# Supplementary material for: Understanding traffic capacity of urban networks
Source: Sci Rep. 2019 Nov 8;9:16283. doi: 10.1038/s41598-019-51539-5 (PMC6841661; doi:10.1038/s41598-019-51539-5)
Supplement: Supplementary file 1 — Supplementary Information [file 41598_2019_51539_MOESM1_ESM.pdf]

# Understanding traffic capacity of urban networks

Allister Loder, Lukas Ambühl, Monica Menendez, Kay W. Axhausen

August 2019

Supplementary information

| No | City        | Country        | Population [1000] | Detectors | Days | Regions |
|----|-------------|----------------|-------------------|-----------|------|---------|
| 1  | Augsburg    | Germany        | 277               | 777       | 20   | 1       |
| 2  | Basel       | Switzerland    | 167               | 83        | 7    | 1       |
| 3  | Bern        | Switzerland    | 129               | 769       | 7    | 1       |
| 4  | Birmingham  | United Kingdom | 1097              | 114       | 6    | 1       |
| 5  | Bolton      | United Kingdom | 128               | 202       | 22   | 1       |
| 6  | Bordeaux    | France         | 754               | 591       | 7    | 4       |
| 7  | Bremen      | Germany        | 549               | 583       | 14   | 2       |
| 8  | Cagliari    | Italy          | 154               | 133       | 50   | 1       |
| 9  | Constance   | Germany        | 81                | 129       | 7    | 1       |
| 10 | Darmstadt   | Germany        | 150               | 393       | 5    | 1       |
| 11 | Duisburg    | Germany        | 487               | 590       | 14   | 1       |
| 12 | Essen       | Germany        | 570               | 38        | 36   | 1       |
| 13 | Frankfurt   | Germany        | 701               | 112       | 1    | 1       |
| 14 | Graz        | Austria        | 270               | 300       | 10   | 1       |
| 15 | Groningen   | Netherlands    | 198               | 55        | 6    | 1       |
| 16 | Hamburg     | Germany        | 1746              | 419       | 105  | 1       |
| 17 | Innsbruck   | Austria        | 125               | 49        | 30   | 1       |
| 18 | Kassel      | Germany        | 194               | 601       | 4    | 3       |
| 19 | London      | United Kingdom | 8478              | 5804      | 22   | 16      |
| 20 | Los Angeles | USA            | 3970              | 4072      | 14   | 3       |
| 21 | Luzern      | Switzerland    | 81                | 159       | 361  | 1       |
| 22 | Madrid      | Spain          | 3142              | 2123      | 20   | 10      |
| 23 | Manchester  | United Kingdom | 517               | 221       | 22   | 1       |
| 24 | Marseille   | France         | 1054              | 178       | 32   | 2       |
| 25 | Melbourne   | Australia      | 4820              | 1649      | 15   | 3       |
| 26 | Munich      | Germany        | 1408              | 548       | 1    | 2       |
| 27 | Paris       | France         | 3236              | 513       | 366  | 4       |
| 28 | Rotterdam   | Netherlands    | 618               | 227       | 6    | 1       |
| 29 | Santander   | Spain          | 176               | 378       | 3    | 2       |
| 30 | Speyer      | Germany        | 50                | 199       | 14   | 1       |
| 31 | Strasbourg  | France         | 228               | 220       | 25   | 1       |
| 32 | Stuttgart   | Germany        | 604               | 298       | 8    | 1       |
| 33 | Taipei      | Taiwan         | 2674              | 445       | 14   | 6       |
| 34 | Tokyo       | Japan          | 9273              | 2111      | 30   | 9       |
| 35 | Torino      | Italy          | 902               | 787       | 21   | 3       |
| 36 | Toronto     | Canada         | 2809              | 298       | 61   | 2       |
| 37 | Toulouse    | France         | 747               | 910       | 7    | 4       |
| 38 | Utrecht     | Netherlands    | 328               | 1072      | 4    | 1       |
| 39 | Vilnius     | Lithuania      | 540               | 581       | 1    | 2       |
| 40 | Wolfsburg   | Germany        | 122               | 405       | 14   | 1       |
| 41 | Zurich      | Switzerland    | 385               | 1225      | 7    | 7       |

Table 1: Sample statistics

|                                         |                                                           | Dependent variables                                    |            |                                                              |            |
|-----------------------------------------|-----------------------------------------------------------|--------------------------------------------------------|------------|--------------------------------------------------------------|------------|
|                                         |                                                           | Critical accumulation $n^*$<br>(veh km <sup>-2</sup> ) |            | Capacity $P^*$<br>(veh-km h <sup>-1</sup> km <sup>-2</sup> ) |            |
| Covariates                              | Unit                                                      | $\beta$                                                | $t$ -value | $\beta$                                                      | $t$ -value |
| Constant                                |                                                           | -269.5                                                 | (-3.23)    | 769.7                                                        | (1.71)     |
| $n^*$                                   | (veh km <sup>-2</sup> )                                   |                                                        |            | 18.80                                                        | (20.77)    |
| $R$                                     | (lane-km km <sup>-2</sup> )                               | 25.63                                                  | (12.85)    |                                                              |            |
| $R \times I$                            | (lane-km km <sup>-2</sup> $\times$ LSA km <sup>-1</sup> ) | -5.748                                                 | (-2.08)    |                                                              |            |
| $b_c$                                   | (-)                                                       | -128.9                                                 | (-3.52)    |                                                              |            |
| $B$                                     | (bus-km h <sup>-1</sup> km <sup>-2</sup> )                | 0.255                                                  | (1.41)     | -5.60                                                        | (-3.71)    |
| $N$                                     |                                                           | 107                                                    |            | 107                                                          |            |
| Adj. $R^2$                              |                                                           | 0.88                                                   |            | 0.93                                                         |            |
|                                         |                                                           |                                                        |            |                                                              |            |
| Elasticity                              |                                                           | $\varepsilon$                                          | $p$ -value | $H_0 : \varepsilon = 1$                                      |            |
| $\partial \log P^* / \partial \log n^*$ |                                                           | 1.00                                                   | 0.989      | not reject                                                   |            |
| $\partial \log n^* / \partial \log R$   |                                                           | 0.85                                                   | 0.000      | reject                                                       |            |

Table 2: Robustness check, critical point model without observation weights.  
The probability that  $n^*$  is exogenous is  $p = 0.0000$ .

|              |                                                           | Dependent variables                                    |            |                                                              |            |
|--------------|-----------------------------------------------------------|--------------------------------------------------------|------------|--------------------------------------------------------------|------------|
|              |                                                           | Critical accumulation $n^*$<br>(veh km <sup>-2</sup> ) |            | Capacity $P^*$<br>(veh-km h <sup>-1</sup> km <sup>-2</sup> ) |            |
| Covariates   | Unit                                                      | $\beta$                                                | $t$ -value | $\beta$                                                      | $t$ -value |
| Constant     |                                                           | 3.359                                                  | (23.53)    | 2.904                                                        | (8.00)     |
| $n^*$        | (veh km <sup>-2</sup> )                                   |                                                        |            | 1.01                                                         | (18.92)    |
| $R$          | (lane-km km <sup>-2</sup> )                               | 0.825                                                  | (25.46)    |                                                              |            |
| $R \times I$ | (lane-km km <sup>-2</sup> $\times$ LSA km <sup>-1</sup> ) | -0.018                                                 | (-0.590)   |                                                              |            |
| $b_c$        | (-)                                                       | -0.183                                                 | (-4.50)    |                                                              |            |
| $B$          | (bus-km h <sup>-1</sup> km <sup>-2</sup> )                | 0.032                                                  | (1.67)     | -0.054                                                       | (-2.87)    |
| $N$          |                                                           | 107                                                    |            | 107                                                          |            |
| Adj. $R^2$   |                                                           | 0.89                                                   |            | 0.91                                                         |            |

  

| Elasticity                              | $\varepsilon$ | $p$ -value | $H_0 : \varepsilon = 1$ |
|-----------------------------------------|---------------|------------|-------------------------|
| $\partial \log P^* / \partial \log n^*$ | 1.01          | 0.876      | not reject              |
| $\partial \log n^* / \partial \log R$   | 0.82          | 0.000      | reject                  |

Table 3: Robustness check, critical point model in log-log specification. Variables  $P^*$ ,  $n^*$ ,  $B$  and  $R$  have been log-transformed, while the others have been left unchanged. The probability that  $n^*$  is exogenous is  $p = 0.0000$ .

|            |                             | Dependent variables                                    |            |                                                        |            |
|------------|-----------------------------|--------------------------------------------------------|------------|--------------------------------------------------------|------------|
|            |                             | Critical density $k^*$<br>(veh lane-km <sup>-1</sup> ) |            | Critical density $k^*$<br>(veh lane-km <sup>-1</sup> ) |            |
|            |                             | with weights                                           |            | without weights                                        |            |
| Covariates | Unit                        | $\beta$                                                | $t$ -value | $\beta$                                                | $t$ -value |
| Constant   |                             | 18.90                                                  | (6.53)     | 20.08                                                  | (7.07)     |
| $R$        | (lane-km km <sup>-2</sup> ) | -0.162                                                 | (-3.53)    | -0.120                                                 | (-2.04)    |
| $b_c$      | (-)                         | -4.928                                                 | (-4.38)    | -4.188                                                 | (-3.62)    |
| $N$        |                             | 107                                                    |            | 107                                                    |            |
| Adj. $R^2$ |                             | 0.25                                                   |            | 0.16                                                   |            |

  

| Elasticity      |                                       | $\varepsilon$ | $p$ -value | $H_0 : \varepsilon = 0$ |
|-----------------|---------------------------------------|---------------|------------|-------------------------|
| With weights    | $\partial \log k^* / \partial \log R$ | -0.143        | 0.001      | reject                  |
| Without weights | $\partial \log k^* / \partial \log R$ | -0.102        | 0.035      | reject                  |

Table 4: Robustness check, critical density equation in veh lane-km<sup>-1</sup> formulation, i.e. not production normalized by unit area. The effects of  $I$  and  $B$  are statistically not significant. Note that the elasticity here is negative as the dependent variable is density, not accumulation, i.e. a sublinear increase in accumulation means that the average density decreases.

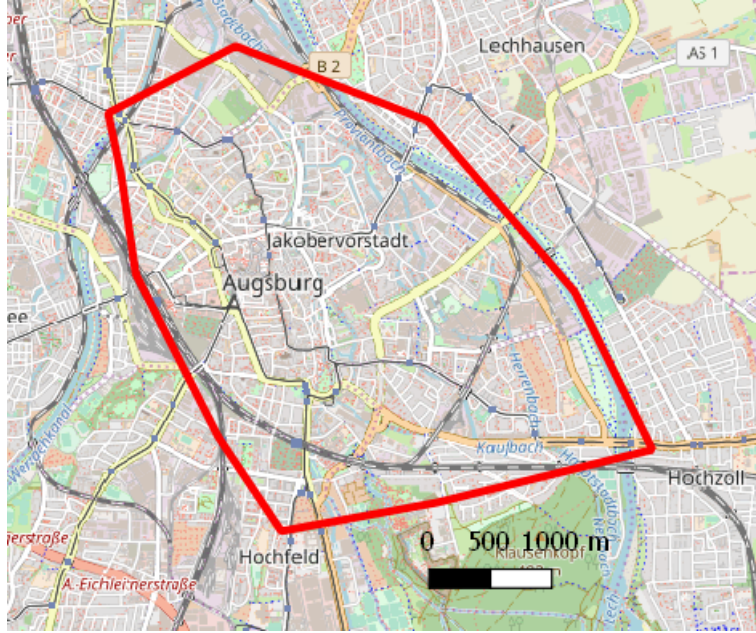

(a) Network exhibit

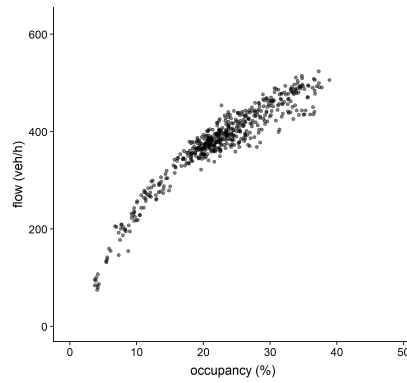

(b) Raw data

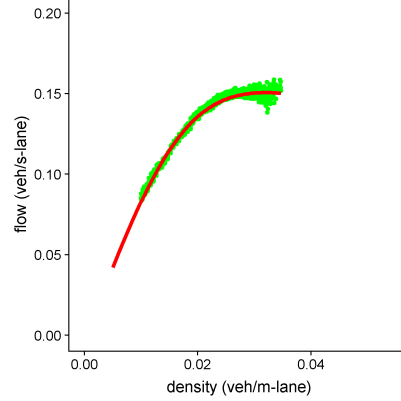

(c) Upper bound and fitted curve

Figure 1: Augsburg Region I. (a) shows the network exhibit used for the MFD estimation and calculation of network topology variables. The map is oriented to the north and is obtained from OpenStreetMap. (b) presents the scatter plot of the raw, i.e., unfiltered, data of the network shown in a. This includes all malfunctioning detectors, oversampling of lanes, detectors on residential roads etc. (c) shows the upper-bound of the estimated MFD and the fitted curve based on the log-exp function by Ambühl et al. (2018). Flow and density are per lane. Occupancy is in the interval 0 to 1 and means the fraction of time in the observation interval a detector is covered by vehicles, i.e., it approximates density.

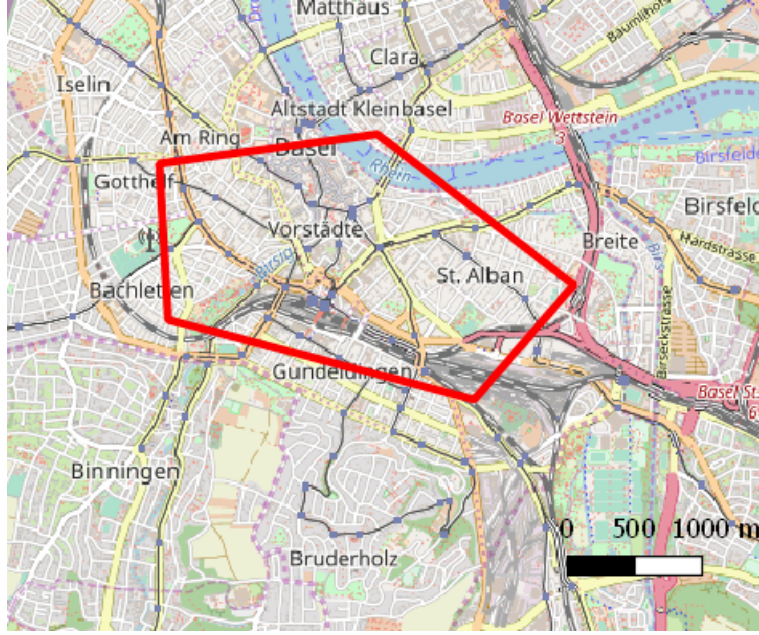

(a) Network exhibit

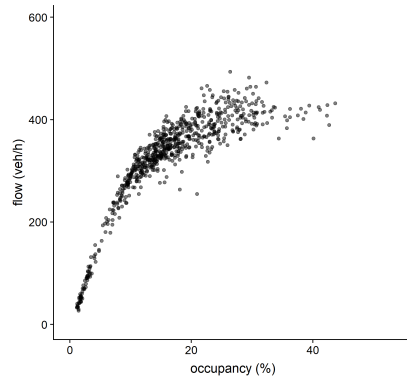

(b) Raw data

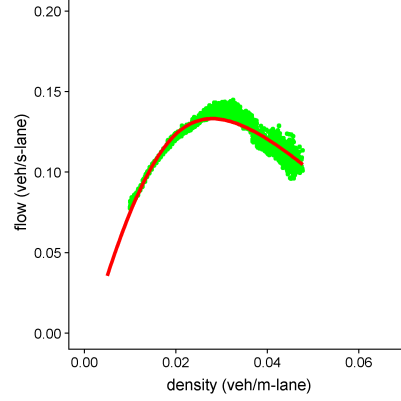

(c) Upper bound and fitted curve

Figure 2: Basel Region I. (a) shows the network exhibit used for the MFD estimation and calculation of network topology variables. The map is oriented to the north and is obtained from OpenStreetMap. (b) presents the scatter plot of the raw, i.e., unfiltered, data of the network shown in a. This includes all malfunctioning detectors, oversampling of lanes, detectors on residential roads etc. (c) shows the upper-bound of the estimated MFD and the fitted curve based on the log-exp function by Ambühl et al. (2018). Flow and density are per lane. Occupancy is in the interval 0 to 1 and means the fraction of time in the observation interval a detector is covered by vehicles, i.e., it approximates density.

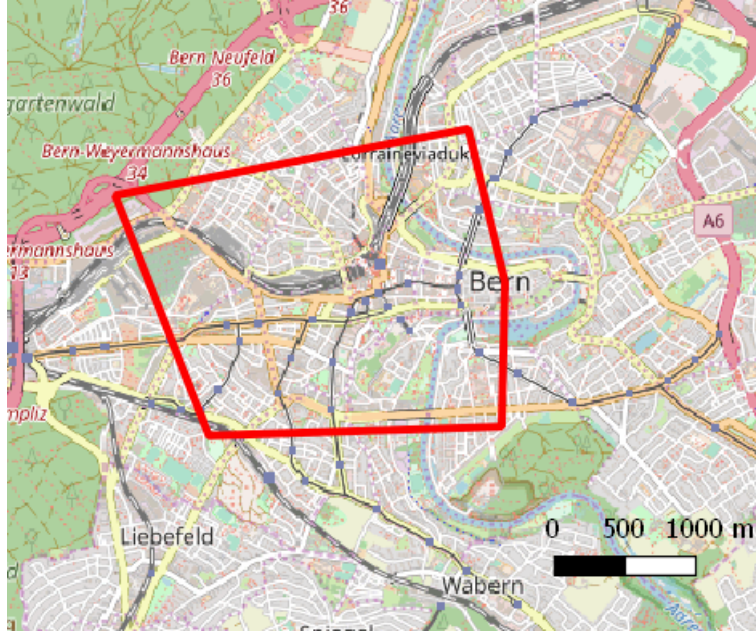

(a) Network exhibit

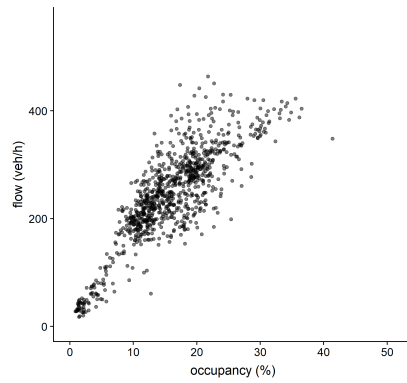

(b) Raw data

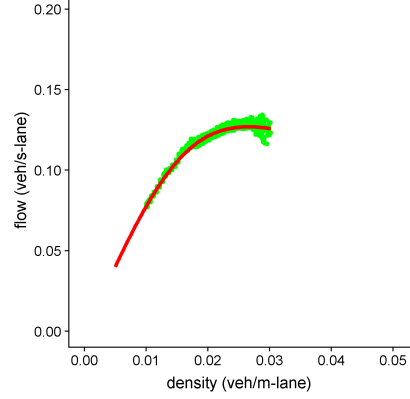

(c) Upper bound and fitted curve

Figure 3: Bern Region I. (a) shows the network exhibit used for the MFD estimation and calculation of network topology variables. The map is oriented to the north and is obtained from OpenStreetMap. (b) presents the scatter plot of the raw, i.e., unfiltered, data of the network shown in a. This includes all malfunctioning detectors, oversampling of lanes, detectors on residential roads etc. (c) shows the upper-bound of the estimated MFD and the fitted curve based on the log-exp function by Ambühl et al. (2018). Flow and density are per lane. Occupancy is in the interval 0 to 1 and means the fraction of time in the observation interval a detector is covered by vehicles, i.e., it approximates density.

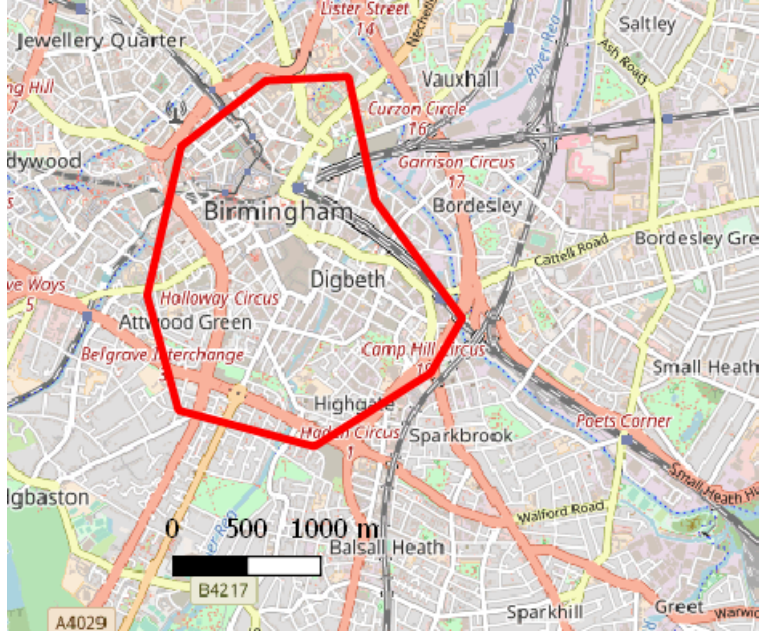

(a) Network exhibit

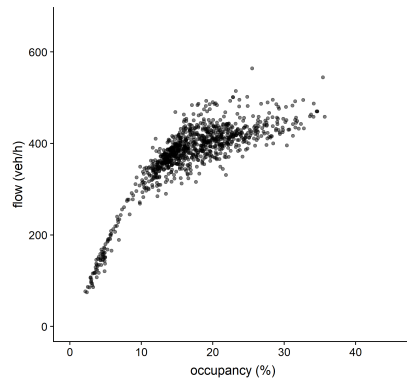

(b) Raw data

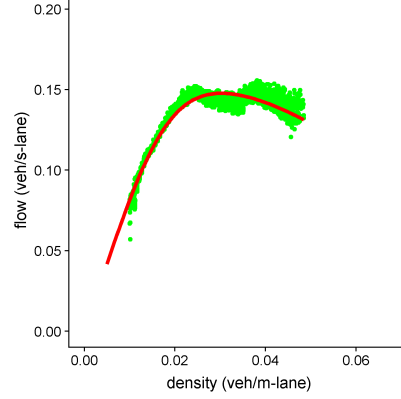

(c) Upper bound and fitted curve

Figure 4: Birmingham Region I. (a) shows the network exhibit used for the MFD estimation and calculation of network topology variables. The map is oriented to the north and is obtained from OpenStreetMap. (b) presents the scatter plot of the raw, i.e., unfiltered, data of the network shown in a. This includes all malfunctioning detectors, oversampling of lanes, detectors on residential roads etc. (c) shows the upper-bound of the estimated MFD and the fitted curve based on the log-exp function by Ambühl et al. (2018). Flow and density are per lane. Occupancy is in the interval 0 to 1 and means the fraction of time in the observation interval a detector is covered by vehicles, i.e., it approximates density.

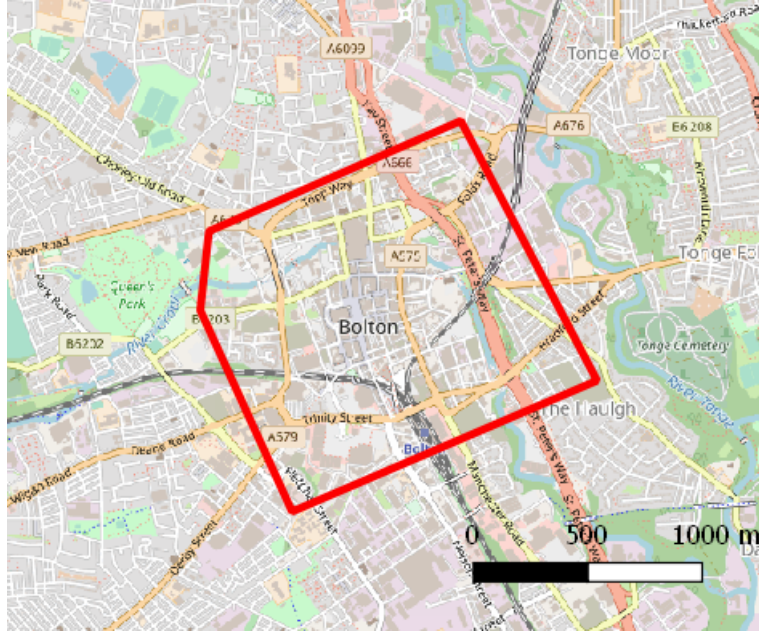

(a) Network exhibit

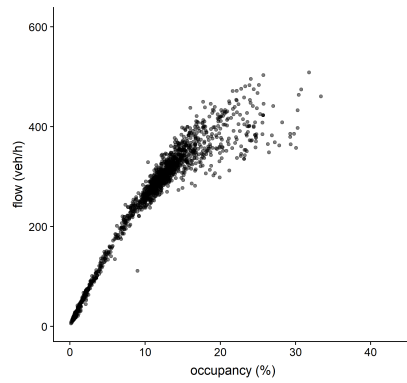

(b) Raw data

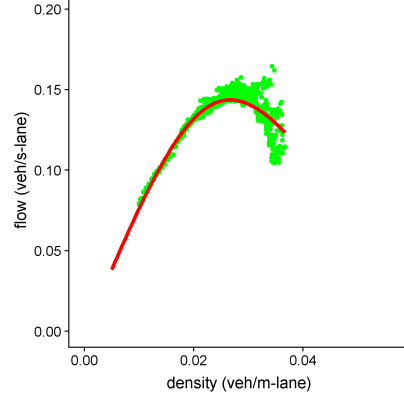

(c) Upper bound and fitted curve

Figure 5: Bolton Region I. (a) shows the network exhibit used for the MFD estimation and calculation of network topology variables. The map is oriented to the north and is obtained from OpenStreetMap. (b) presents the scatter plot of the raw, i.e., unfiltered, data of the network shown in a. This includes all malfunctioning detectors, oversampling of lanes, detectors on residential roads etc. (c) shows the upper-bound of the estimated MFD and the fitted curve based on the log-exp function by Ambühl et al. (2018). Flow and density are per lane. Occupancy is in the interval 0 to 1 and means the fraction of time in the observation interval a detector is covered by vehicles, i.e., it approximates density.

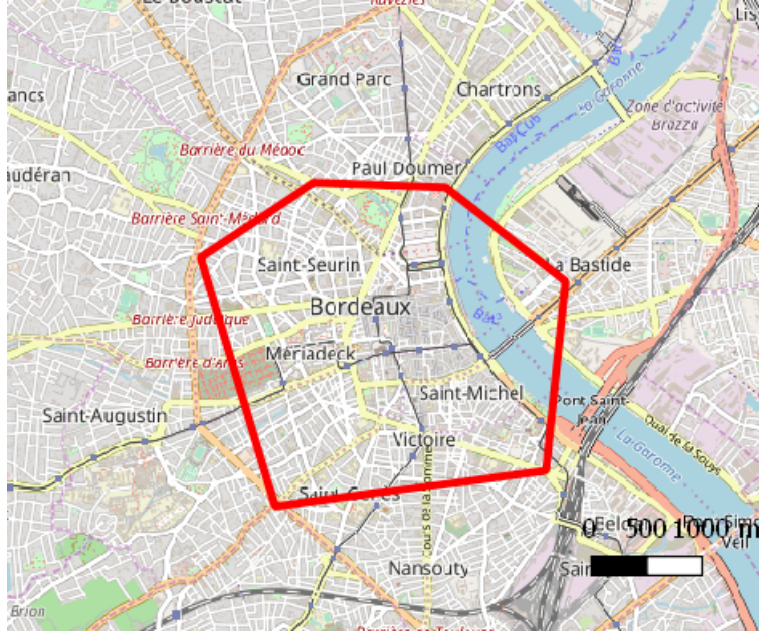

(a) Network exhibit

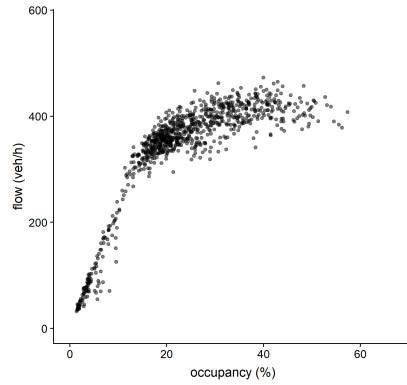

(b) Raw data

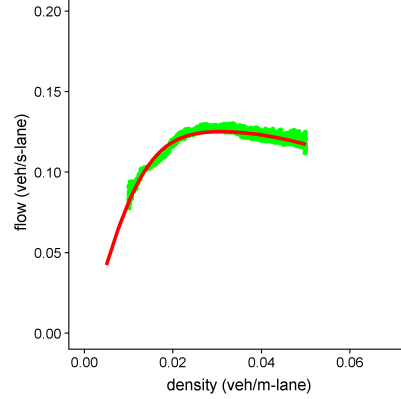

(c) Upper bound and fitted curve

Figure 6: Bordeaux Region I. (a) shows the network exhibit used for the MFD estimation and calculation of network topology variables. The map is oriented to the north and is obtained from OpenStreetMap. (b) presents the scatter plot of the raw, i.e., unfiltered, data of the network shown in a. This includes all malfunctioning detectors, oversampling of lanes, detectors on residential roads etc. (c) shows the upper-bound of the estimated MFD and the fitted curve based on the log-exp function by Ambühl et al. (2018). Flow and density are per lane. Occupancy is in the interval 0 to 1 and means the fraction of time in the observation interval a detector is covered by vehicles, i.e., it approximates density.

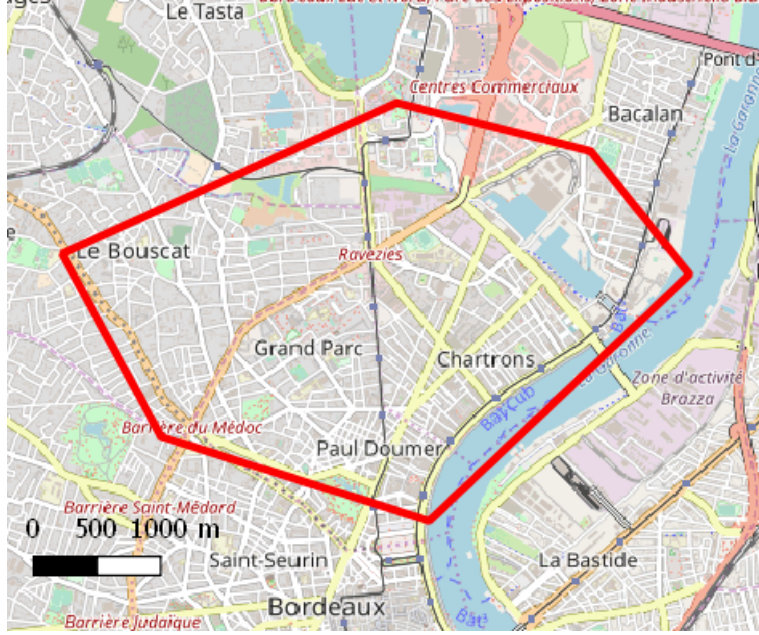

(a) Network exhibit

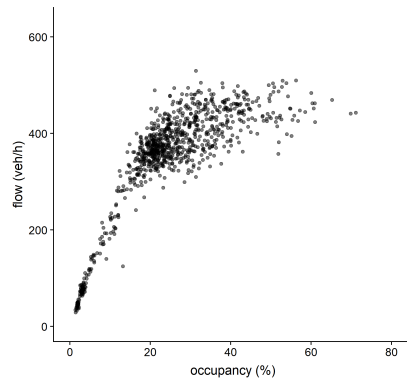

(b) Raw data

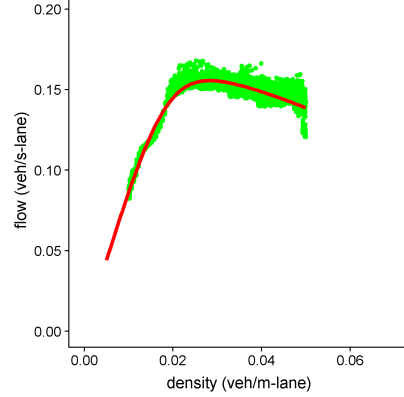

(c) Upper bound and fitted curve

Figure 7: Bordeaux Region II. (a) shows the network exhibit used for the MFD estimation and calculation of network topology variables. The map is oriented to the north and is obtained from OpenStreetMap. (b) presents the scatter plot of the raw, i.e., unfiltered, data of the network shown in a. This includes all malfunctioning detectors, oversampling of lanes, detectors on residential roads etc. (c) shows the upper-bound of the estimated MFD and the fitted curve based on the log-exp function by Ambühl et al. (2018). Flow and density are per lane. Occupancy is in the interval 0 to 1 and means the fraction of time in the observation interval a detector is covered by vehicles, i.e., it approximates density.

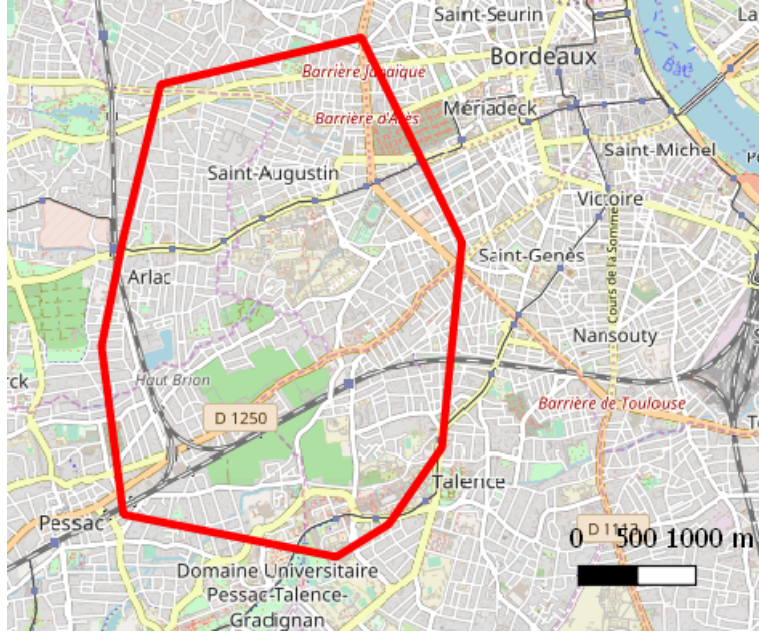

(a) Network exhibit

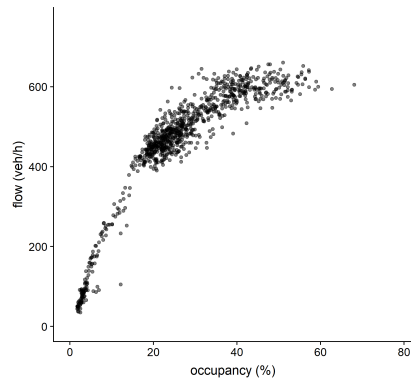

(b) Raw data

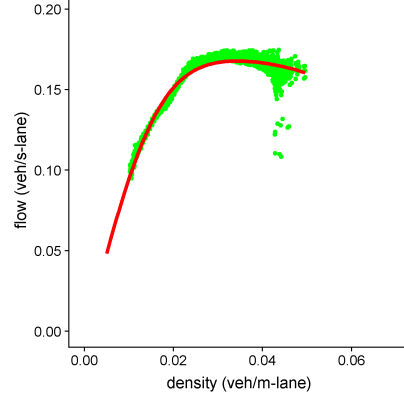

(c) Upper bound and fitted curve

Figure 8: Bordeaux Region III. (a) shows the network exhibit used for the MFD estimation and calculation of network topology variables. The map is oriented to the north and is obtained from OpenStreetMap. (b) presents the scatter plot of the raw, i.e., unfiltered, data of the network shown in a. This includes all malfunctioning detectors, oversampling of lanes, detectors on residential roads etc. (c) shows the upper-bound of the estimated MFD and the fitted curve based on the log-exp function by Ambühl et al. (2018). Flow and density are per lane. Occupancy is in the interval 0 to 1 and means the fraction of time in the observation interval a detector is covered by vehicles, i.e., it approximates density.

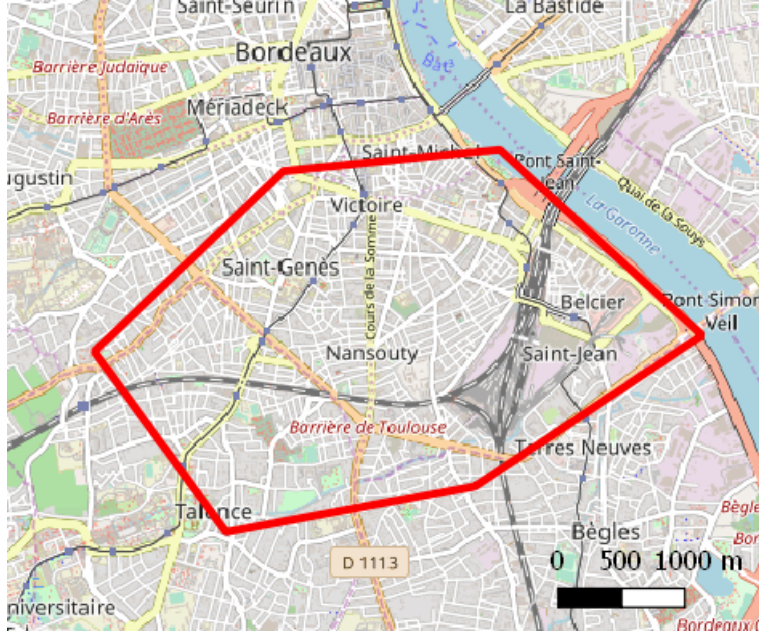

(a) Network exhibit

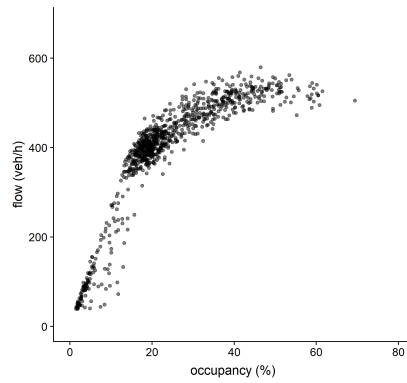

(b) Raw data

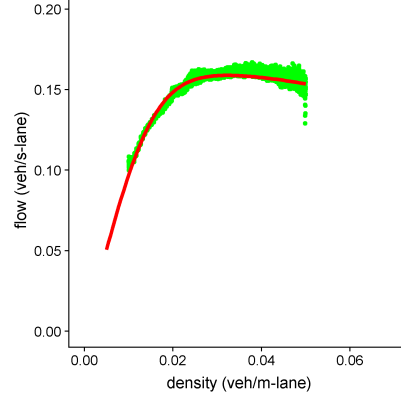

(c) Upper bound and fitted curve

Figure 9: Bordeaux Region IV. (a) shows the network exhibit used for the MFD estimation and calculation of network topology variables. The map is oriented to the north and is obtained from OpenStreetMap. (b) presents the scatter plot of the raw, i.e., unfiltered, data of the network shown in a. This includes all malfunctioning detectors, oversampling of lanes, detectors on residential roads etc. (c) shows the upper-bound of the estimated MFD and the fitted curve based on the log-exp function by Ambühl et al. (2018). Flow and density are per lane. Occupancy is in the interval 0 to 1 and means the fraction of time in the observation interval a detector is covered by vehicles, i.e., it approximates density.

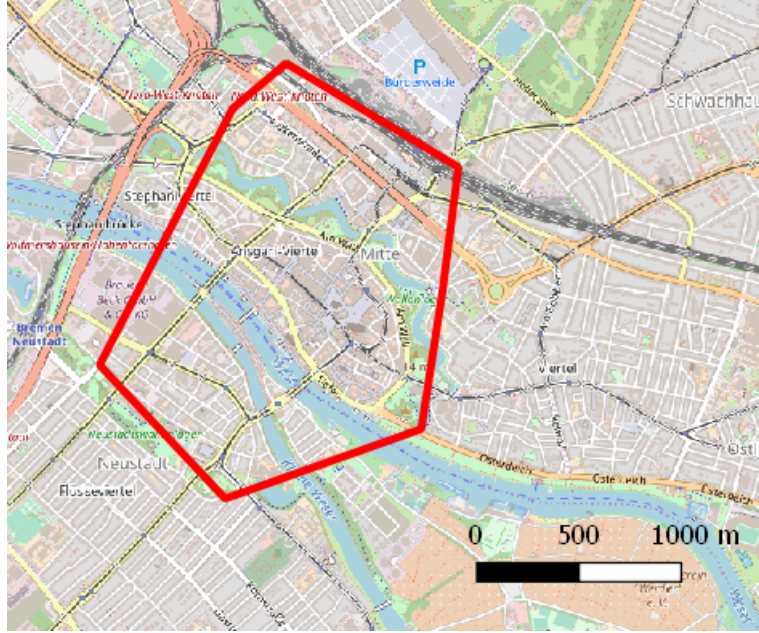

(a) Network exhibit

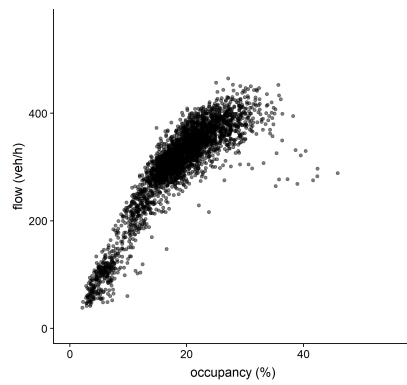

(b) Raw data

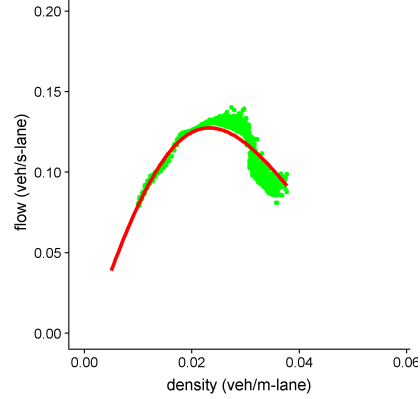

(c) Upper bound and fitted curve

Figure 10: Bremen Region I. (a) shows the network exhibit used for the MFD estimation and calculation of network topology variables. The map is oriented to the north and is obtained from OpenStreetMap. (b) presents the scatter plot of the raw, i.e., unfiltered, data of the network shown in a. This includes all malfunctioning detectors, oversampling of lanes, detectors on residential roads etc. (c) shows the upper-bound of the estimated MFD and the fitted curve based on the log-exp function by Ambühl et al. (2018). Flow and density are per lane. Occupancy is in the interval 0 to 1 and means the fraction of time in the observation interval a detector is covered by vehicles, i.e., it approximates density.

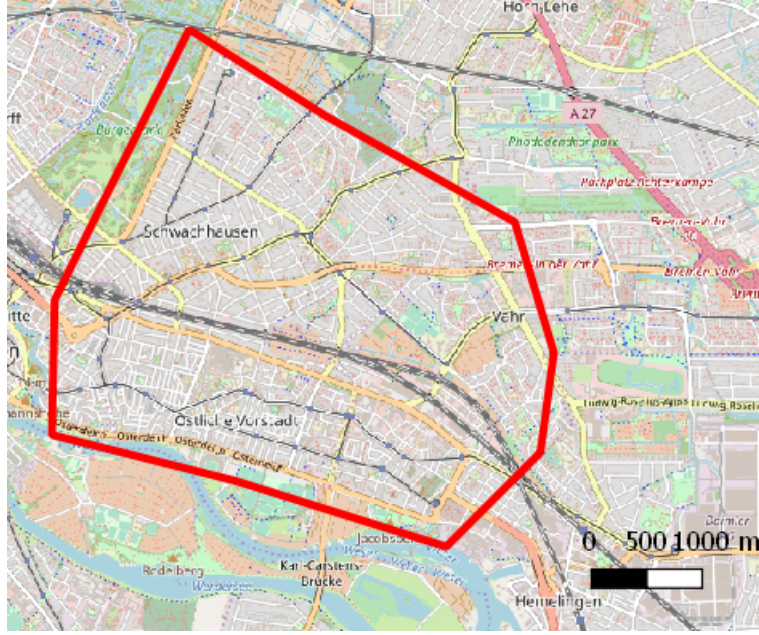

(a) Network exhibit

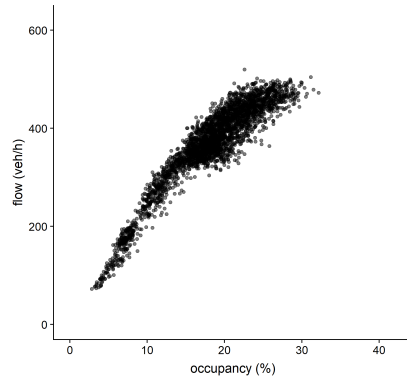

(b) Raw data

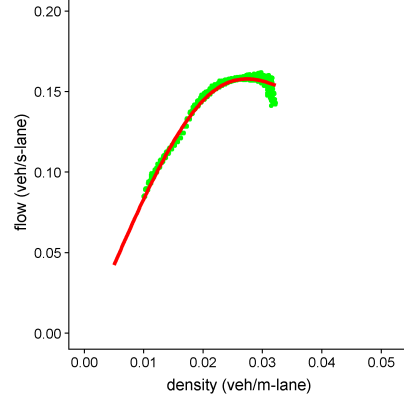

(c) Upper bound and fitted curve

Figure 11: Bremen Region II. (a) shows the network exhibit used for the MFD estimation and calculation of network topology variables. The map is oriented to the north and is obtained from OpenStreetMap. (b) presents the scatter plot of the raw, i.e., unfiltered, data of the network shown in a. This includes all malfunctioning detectors, oversampling of lanes, detectors on residential roads etc. (c) shows the upper-bound of the estimated MFD and the fitted curve based on the log-exp function by Ambühl et al. (2018). Flow and density are per lane. Occupancy is in the interval 0 to 1 and means the fraction of time in the observation interval a detector is covered by vehicles, i.e., it approximates density.

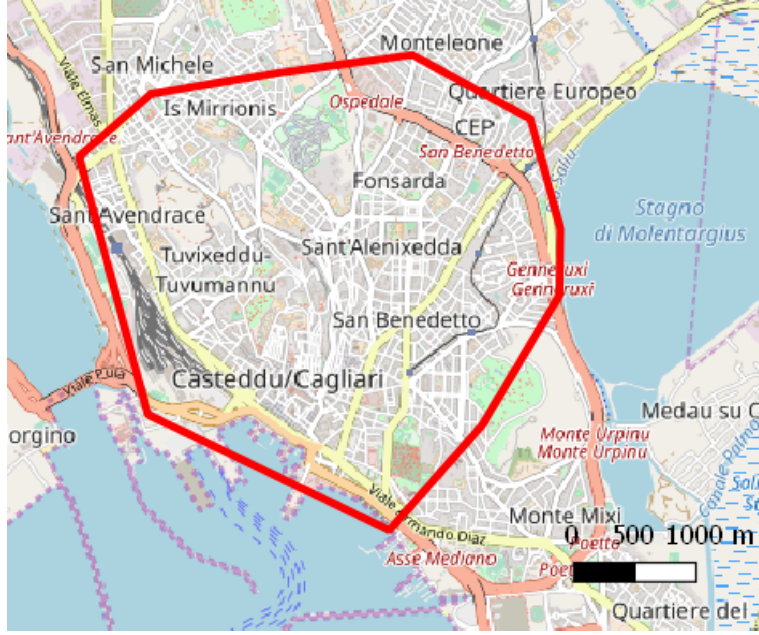

(a) Network exhibit

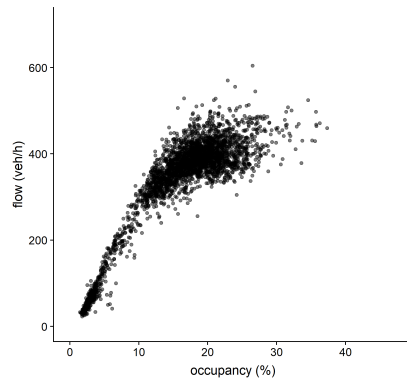

(b) Raw data

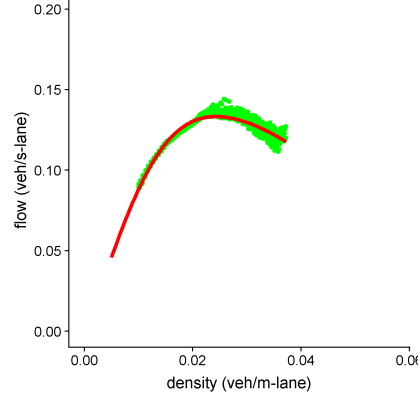

(c) Upper bound and fitted curve

Figure 12: Cagliari Region I. (a) shows the network exhibit used for the MFD estimation and calculation of network topology variables. The map is oriented to the north and is obtained from OpenStreetMap. (b) presents the scatter plot of the raw, i.e., unfiltered, data of the network shown in a. This includes all malfunctioning detectors, oversampling of lanes, detectors on residential roads etc. (c) shows the upper-bound of the estimated MFD and the fitted curve based on the log-exp function by Ambühl et al. (2018). Flow and density are per lane. Occupancy is in the interval 0 to 1 and means the fraction of time in the observation interval a detector is covered by vehicles, i.e., it approximates density.

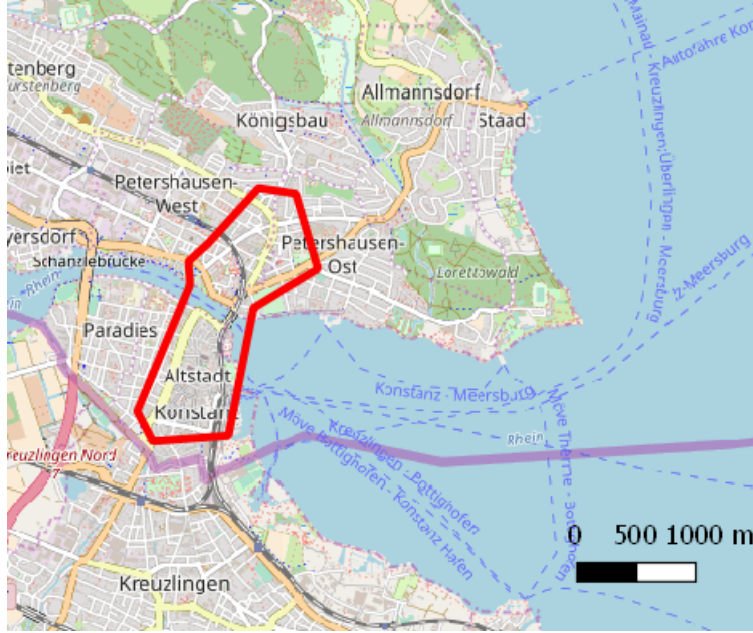

(a) Network exhibit

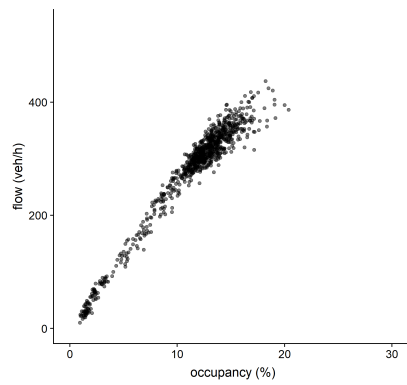

(b) Raw data

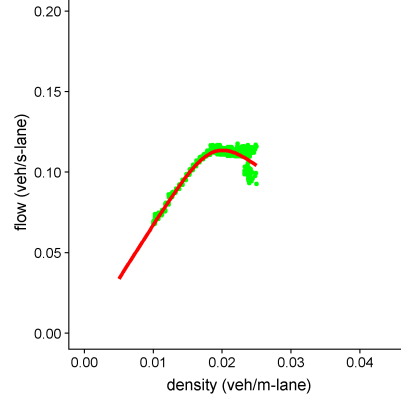

(c) Upper bound and fitted curve

Figure 13: Constance Region I. (a) shows the network exhibit used for the MFD estimation and calculation of network topology variables. The map is oriented to the north and is obtained from OpenStreetMap. (b) presents the scatter plot of the raw, i.e., unfiltered, data of the network shown in a. This includes all malfunctioning detectors, oversampling of lanes, detectors on residential roads etc. (c) shows the upper-bound of the estimated MFD and the fitted curve based on the log-exp function by Ambühl et al. (2018). Flow and density are per lane. Occupancy is in the interval 0 to 1 and means the fraction of time in the observation interval a detector is covered by vehicles, i.e., it approximates density.

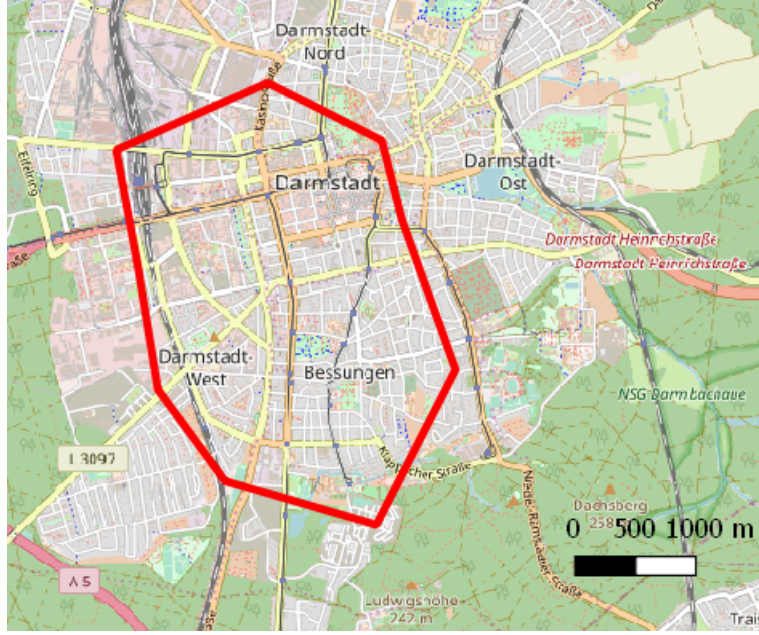

(a) Network exhibit

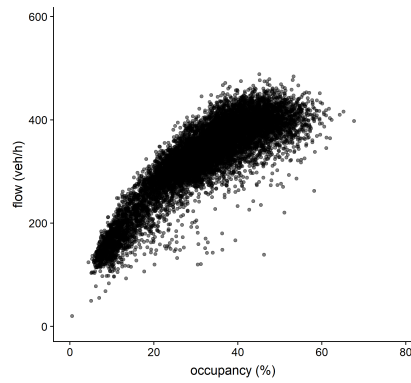

(b) Raw data

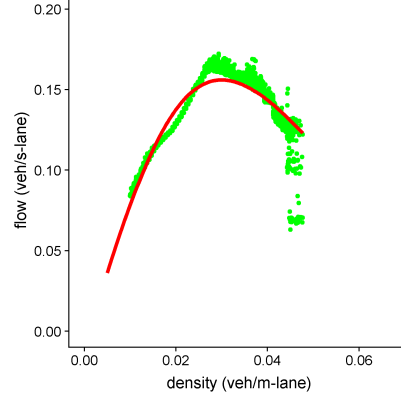

(c) Upper bound and fitted curve

Figure 14: Darmstadt Region I. (a) shows the network exhibit used for the MFD estimation and calculation of network topology variables. The map is oriented to the north and is obtained from OpenStreetMap. (b) presents the scatter plot of the raw, i.e., unfiltered, data of the network shown in a. This includes all malfunctioning detectors, oversampling of lanes, detectors on residential roads etc. (c) shows the upper-bound of the estimated MFD and the fitted curve based on the log-exp function by Ambühl et al. (2018). Flow and density are per lane. Occupancy is in the interval 0 to 1 and means the fraction of time in the observation interval a detector is covered by vehicles, i.e., it approximates density.

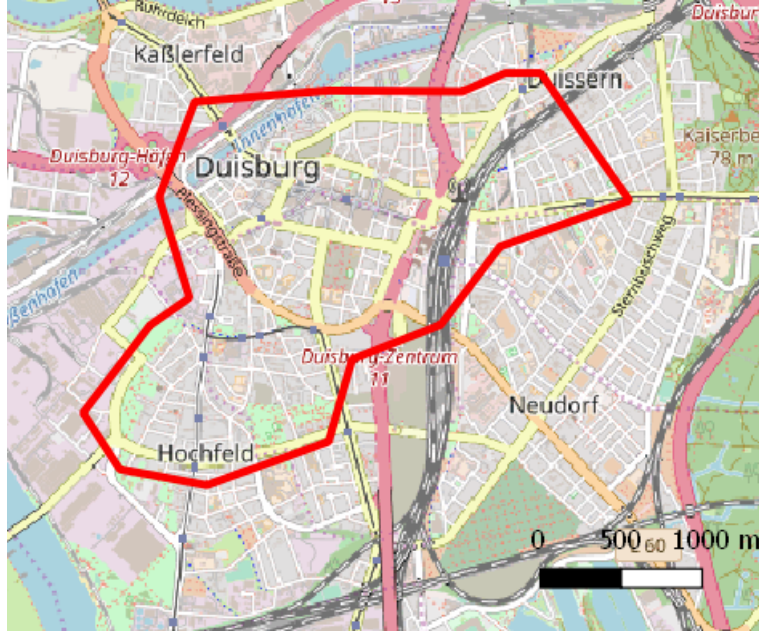

(a) Network exhibit

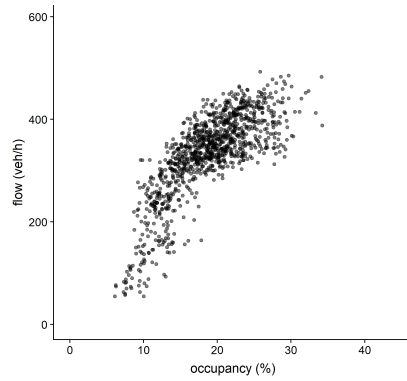

(b) Raw data

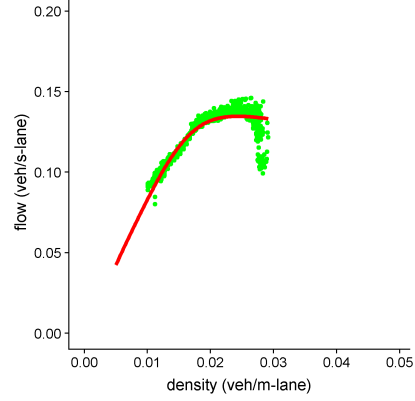

(c) Upper bound and fitted curve

Figure 15: Duisburg Region I. (a) shows the network exhibit used for the MFD estimation and calculation of network topology variables. The map is oriented to the north and is obtained from OpenStreetMap. (b) presents the scatter plot of the raw, i.e., unfiltered, data of the network shown in a. This includes all malfunctioning detectors, oversampling of lanes, detectors on residential roads etc. (c) shows the upper-bound of the estimated MFD and the fitted curve based on the log-exp function by Ambühl et al. (2018). Flow and density are per lane. Occupancy is in the interval 0 to 1 and means the fraction of time in the observation interval a detector is covered by vehicles, i.e., it approximates density.

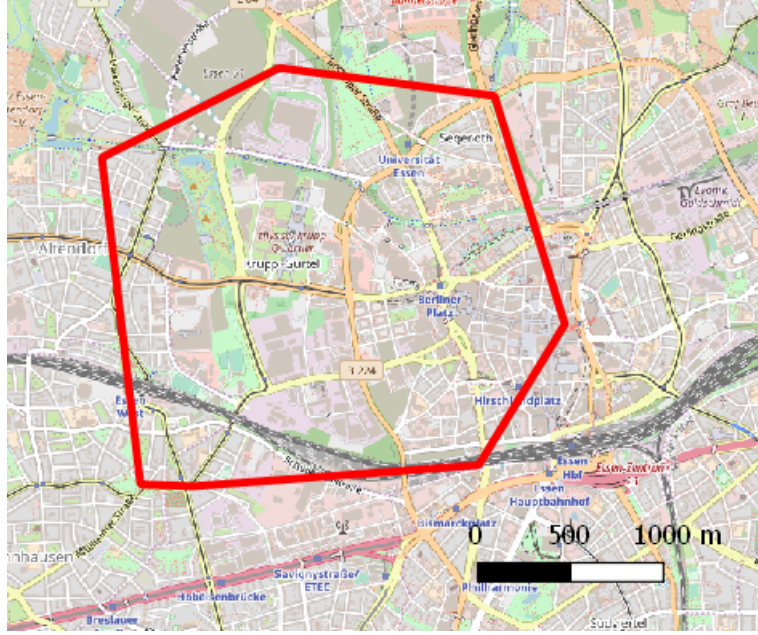

(a) Network exhibit

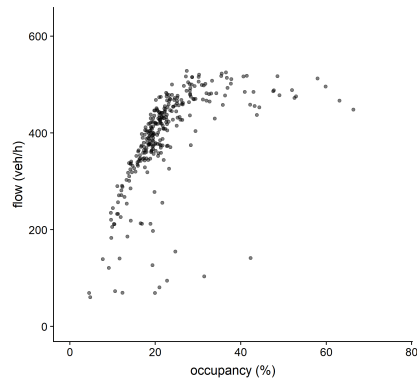

(b) Raw data

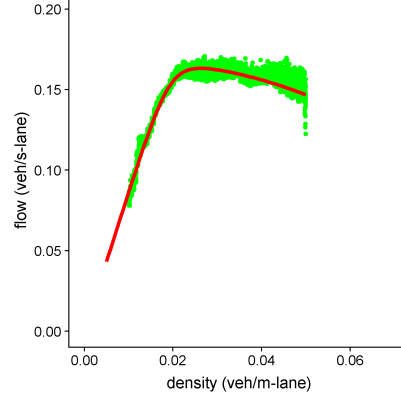

(c) Upper bound and fitted curve

Figure 16: Essen Region I. (a) shows the network exhibit used for the MFD estimation and calculation of network topology variables. The map is oriented to the north and is obtained from OpenStreetMap. (b) presents the scatter plot of the raw, i.e., unfiltered, data of the network shown in a. This includes all malfunctioning detectors, oversampling of lanes, detectors on residential roads etc. (c) shows the upper-bound of the estimated MFD and the fitted curve based on the log-exp function by Ambühl et al. (2018). Flow and density are per lane. Occupancy is in the interval 0 to 1 and means the fraction of time in the observation interval a detector is covered by vehicles, i.e., it approximates density.

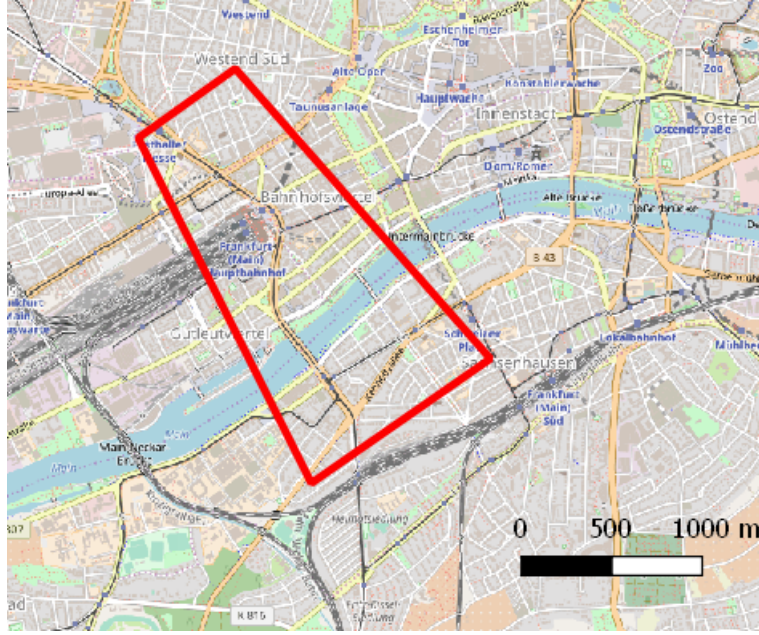

(a) Network exhibit

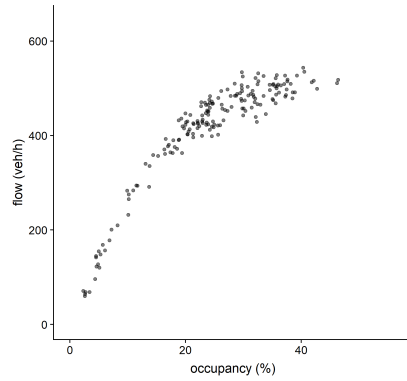

(b) Raw data

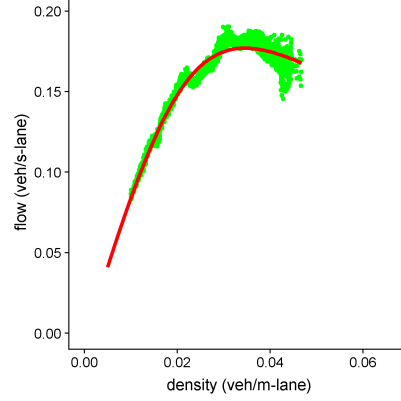

(c) Upper bound and fitted curve

Figure 17: Frankfurt Region I. (a) shows the network exhibit used for the MFD estimation and calculation of network topology variables. The map is oriented to the north and is obtained from OpenStreetMap. (b) presents the scatter plot of the raw, i.e., unfiltered, data of the network shown in a. This includes all malfunctioning detectors, oversampling of lanes, detectors on residential roads etc. (c) shows the upper-bound of the estimated MFD and the fitted curve based on the log-exp function by Ambühl et al. (2018). Flow and density are per lane. Occupancy is in the interval 0 to 1 and means the fraction of time in the observation interval a detector is covered by vehicles, i.e., it approximates density.

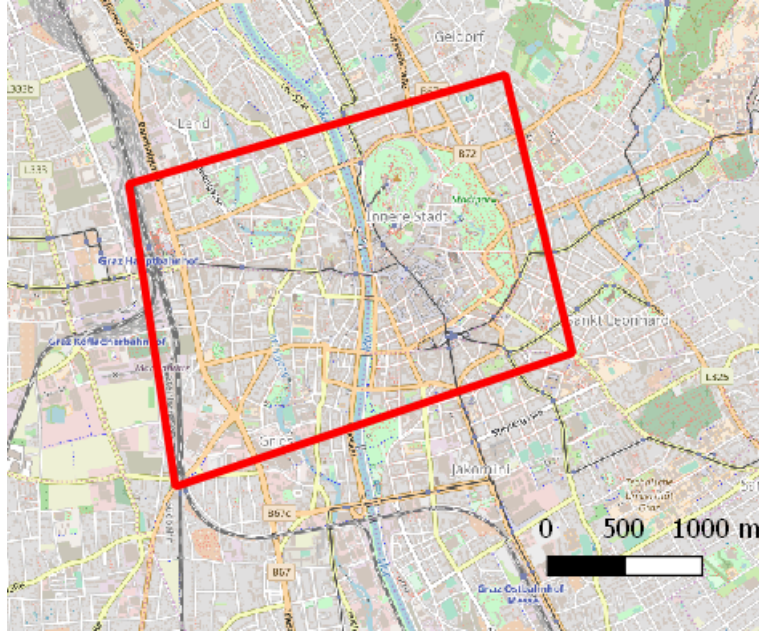

(a) Network exhibit

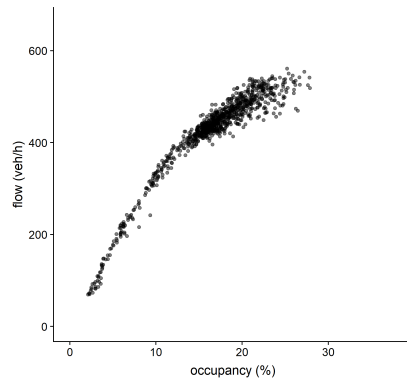

(b) Raw data

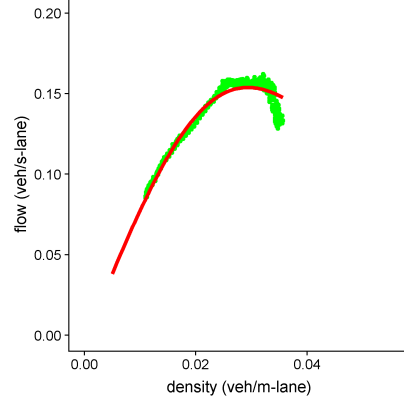

(c) Upper bound and fitted curve

Figure 18: Graz Region I. (a) shows the network exhibit used for the MFD estimation and calculation of network topology variables. The map is oriented to the north and is obtained from OpenStreetMap. (b) presents the scatter plot of the raw, i.e., unfiltered, data of the network shown in a. This includes all malfunctioning detectors, oversampling of lanes, detectors on residential roads etc. (c) shows the upper-bound of the estimated MFD and the fitted curve based on the log-exp function by Ambühl et al. (2018). Flow and density are per lane. Occupancy is in the interval 0 to 1 and means the fraction of time in the observation interval a detector is covered by vehicles, i.e., it approximates density.

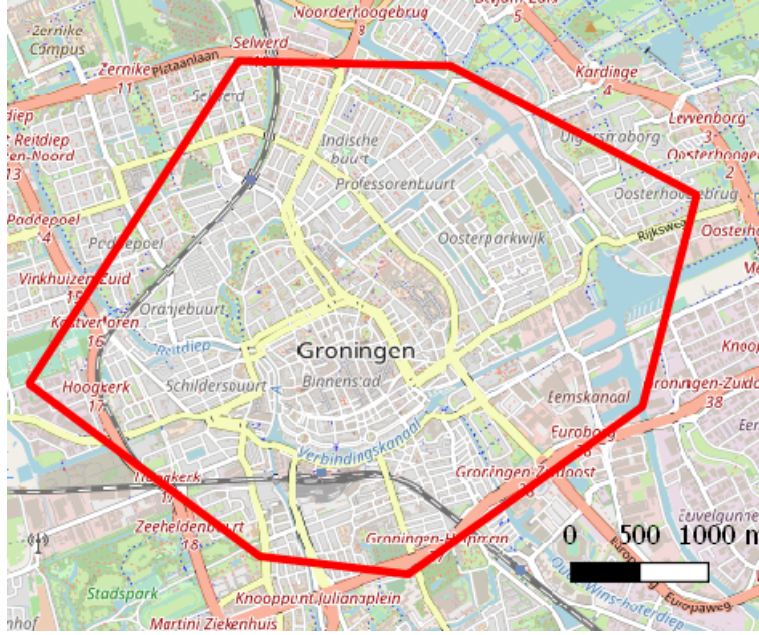

(a) Network exhibit

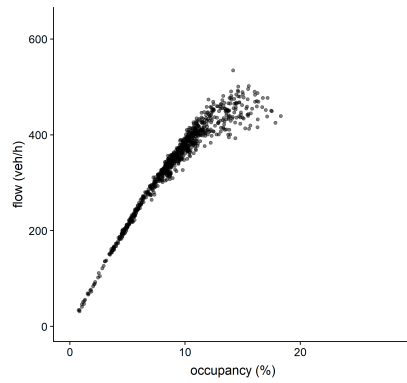

(b) Raw data

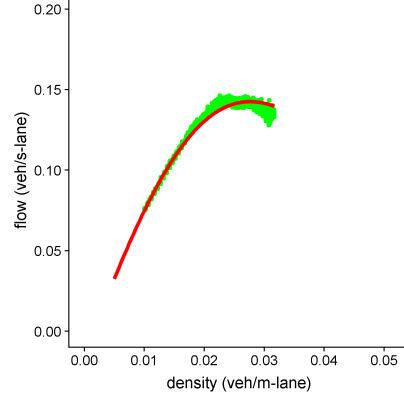

(c) Upper bound and fitted curve

Figure 19: Groningen Region I. (a) shows the network exhibit used for the MFD estimation and calculation of network topology variables. The map is oriented to the north and is obtained from OpenStreetMap. (b) presents the scatter plot of the raw, i.e., unfiltered, data of the network shown in a. This includes all malfunctioning detectors, oversampling of lanes, detectors on residential roads etc. (c) shows the upper-bound of the estimated MFD and the fitted curve based on the log-exp function by Ambühl et al. (2018). Flow and density are per lane. Occupancy is in the interval 0 to 1 and means the fraction of time in the observation interval a detector is covered by vehicles, i.e., it approximates density.

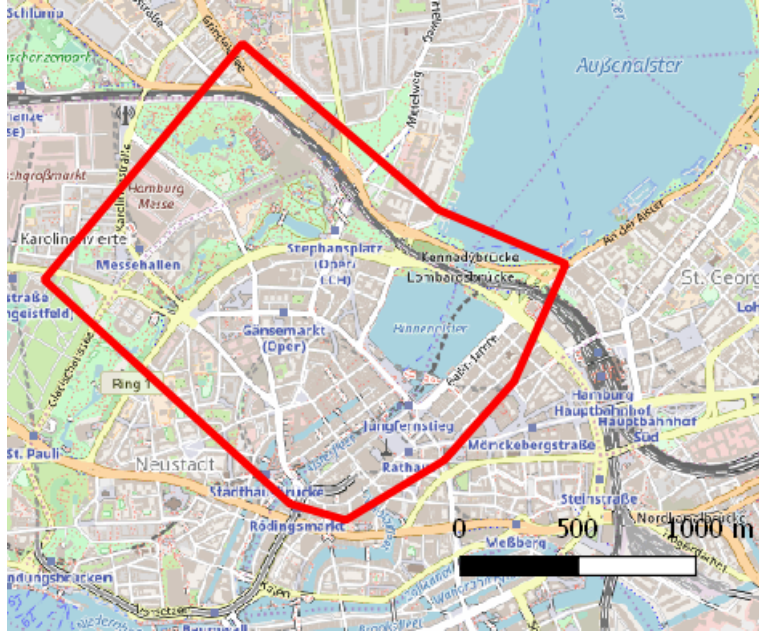

(a) Network exhibit

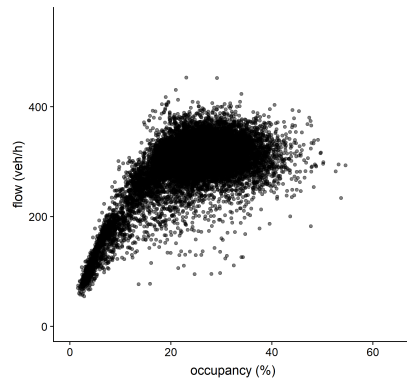

(b) Raw data

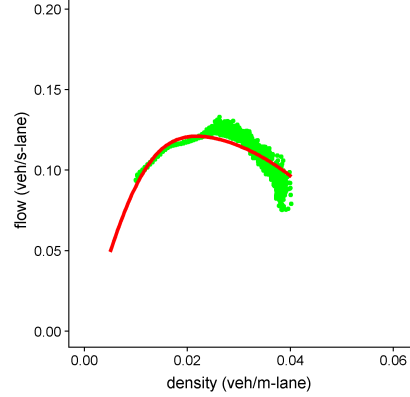

(c) Upper bound and fitted curve

Figure 20: Hamburg Region I. (a) shows the network exhibit used for the MFD estimation and calculation of network topology variables. The map is oriented to the north and is obtained from OpenStreetMap. (b) presents the scatter plot of the raw, i.e., unfiltered, data of the network shown in a. This includes all malfunctioning detectors, oversampling of lanes, detectors on residential roads etc. (c) shows the upper-bound of the estimated MFD and the fitted curve based on the log-exp function by Ambühl et al. (2018). Flow and density are per lane. Occupancy is in the interval 0 to 1 and means the fraction of time in the observation interval a detector is covered by vehicles, i.e., it approximates density.

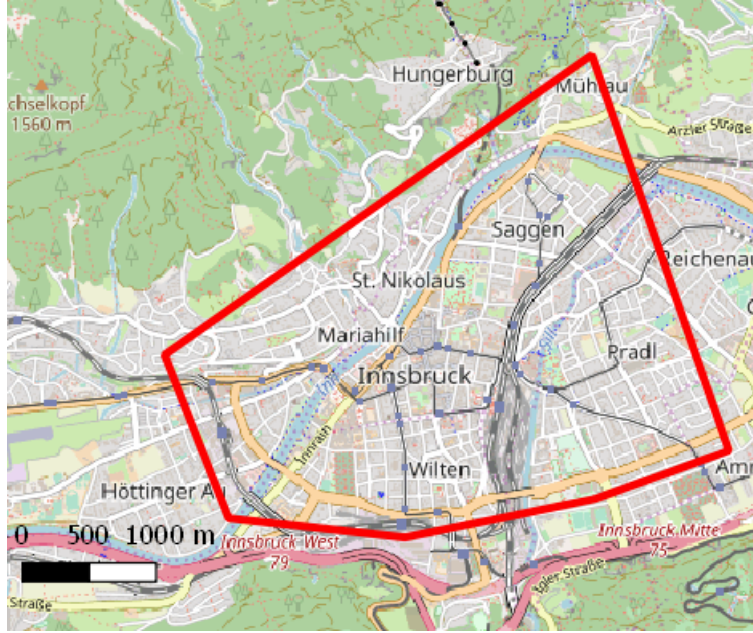

(a) Network exhibit

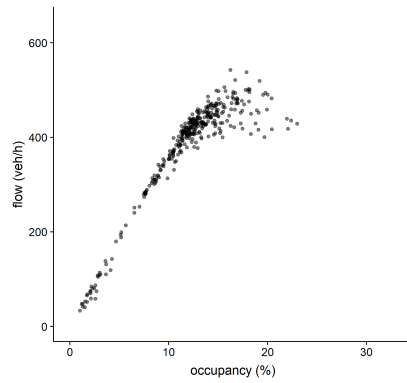

(b) Raw data

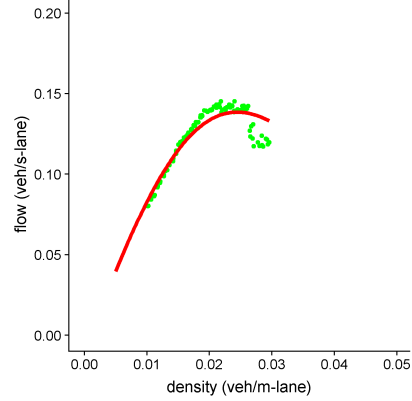

(c) Upper bound and fitted curve

Figure 21: Innsbruck Region I. (a) shows the network exhibit used for the MFD estimation and calculation of network topology variables. The map is oriented to the north and is obtained from OpenStreetMap. (b) presents the scatter plot of the raw, i.e., unfiltered, data of the network shown in a. This includes all malfunctioning detectors, oversampling of lanes, detectors on residential roads etc. (c) shows the upper-bound of the estimated MFD and the fitted curve based on the log-exp function by Ambühl et al. (2018). Flow and density are per lane. Occupancy is in the interval 0 to 1 and means the fraction of time in the observation interval a detector is covered by vehicles, i.e., it approximates density.

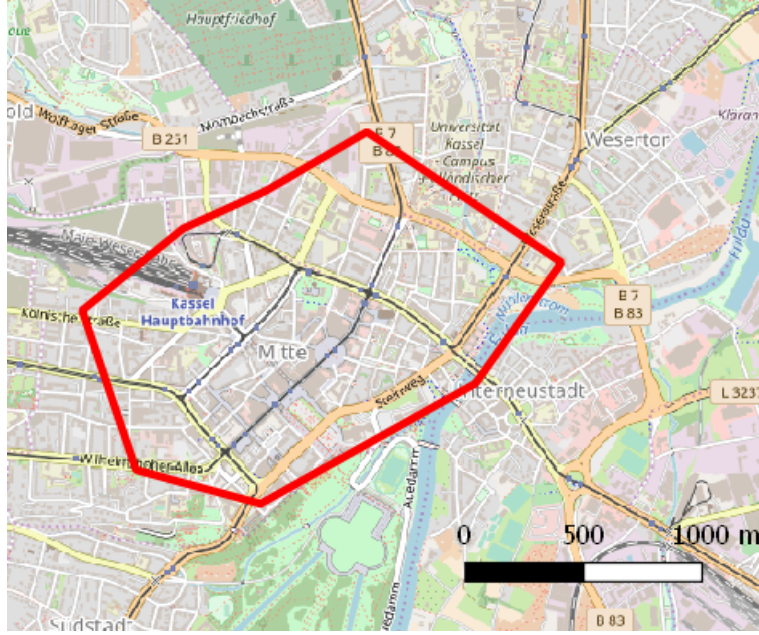

(a) Network exhibit

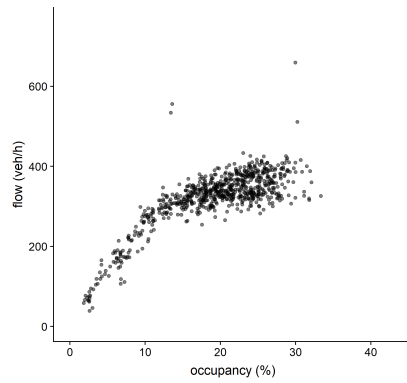

(b) Raw data

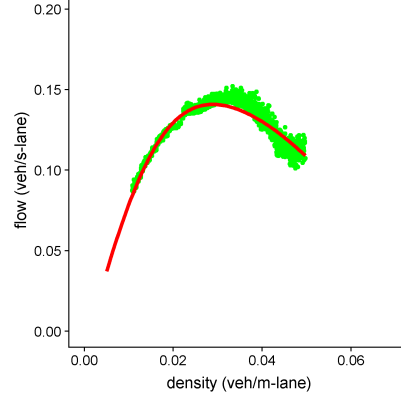

(c) Upper bound and fitted curve

Figure 22: Kassel Region I. (a) shows the network exhibit used for the MFD estimation and calculation of network topology variables. The map is oriented to the north and is obtained from OpenStreetMap. (b) presents the scatter plot of the raw, i.e., unfiltered, data of the network shown in a. This includes all malfunctioning detectors, oversampling of lanes, detectors on residential roads etc. (c) shows the upper-bound of the estimated MFD and the fitted curve based on the log-exp function by Ambühl et al. (2018). Flow and density are per lane. Occupancy is in the interval 0 to 1 and means the fraction of time in the observation interval a detector is covered by vehicles, i.e., it approximates density.

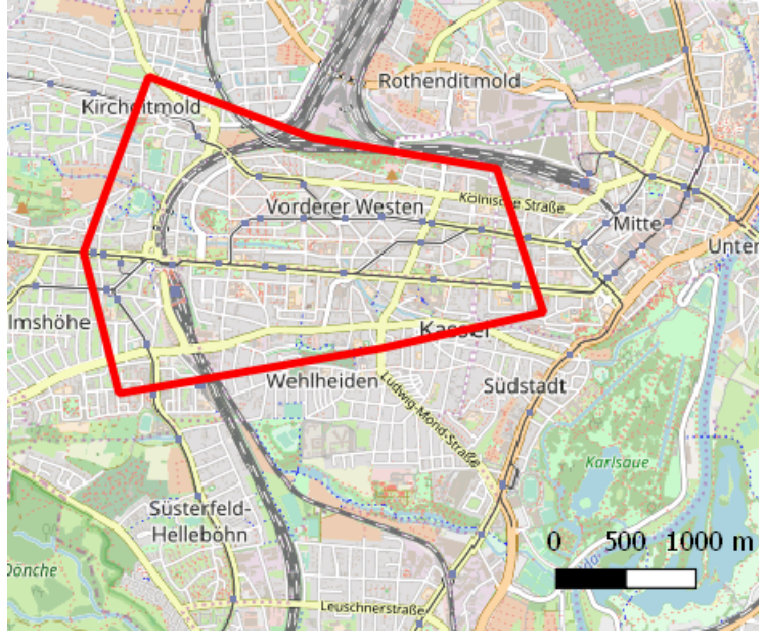

(a) Network exhibit

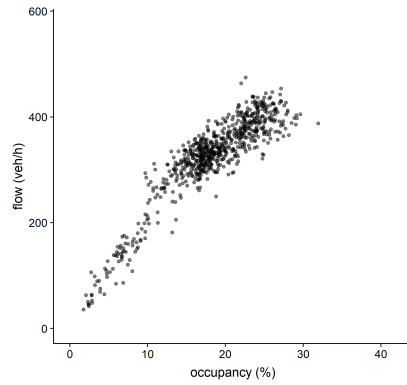

(b) Raw data

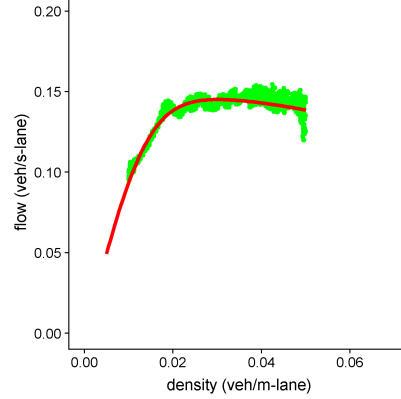

(c) Upper bound and fitted curve

Figure 23: Kassel Region II. (a) shows the network exhibit used for the MFD estimation and calculation of network topology variables. The map is oriented to the north and is obtained from OpenStreetMap. (b) presents the scatter plot of the raw, i.e., unfiltered, data of the network shown in a. This includes all malfunctioning detectors, oversampling of lanes, detectors on residential roads etc. (c) shows the upper-bound of the estimated MFD and the fitted curve based on the log-exp function by Ambühl et al. (2018). Flow and density are per lane. Occupancy is in the interval 0 to 1 and means the fraction of time in the observation interval a detector is covered by vehicles, i.e., it approximates density.

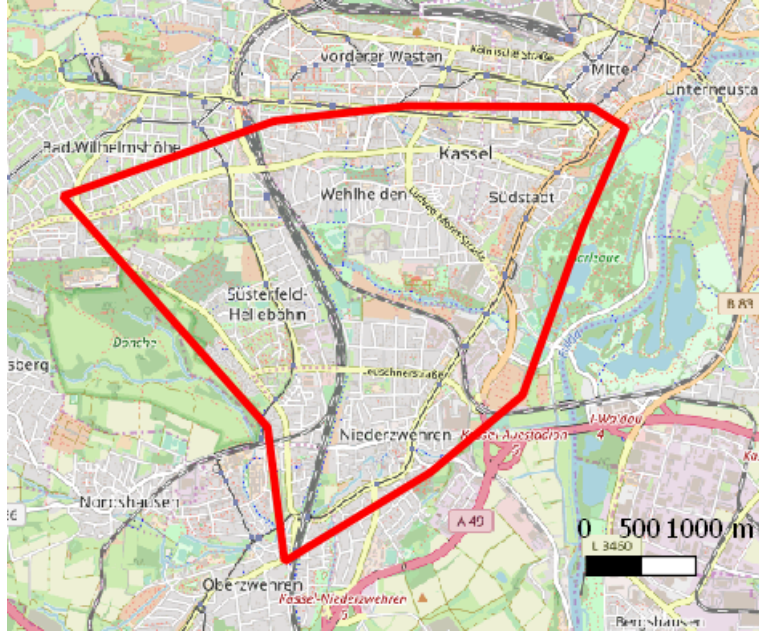

(a) Network exhibit

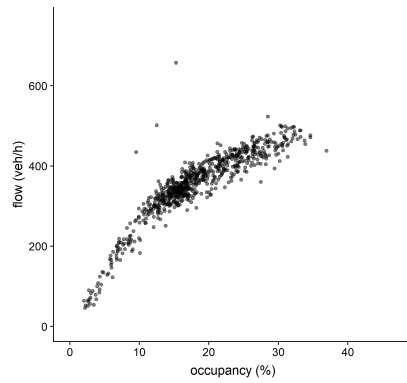

(b) Raw data

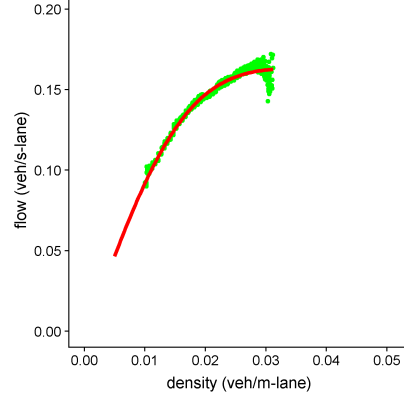

(c) Upper bound and fitted curve

Figure 24: Kassel Region III. (a) shows the network exhibit used for the MFD estimation and calculation of network topology variables. The map is oriented to the north and is obtained from OpenStreetMap. (b) presents the scatter plot of the raw, i.e., unfiltered, data of the network shown in a. This includes all malfunctioning detectors, oversampling of lanes, detectors on residential roads etc. (c) shows the upper-bound of the estimated MFD and the fitted curve based on the log-exp function by Ambühl et al. (2018). Flow and density are per lane. Occupancy is in the interval 0 to 1 and means the fraction of time in the observation interval a detector is covered by vehicles, i.e., it approximates density.

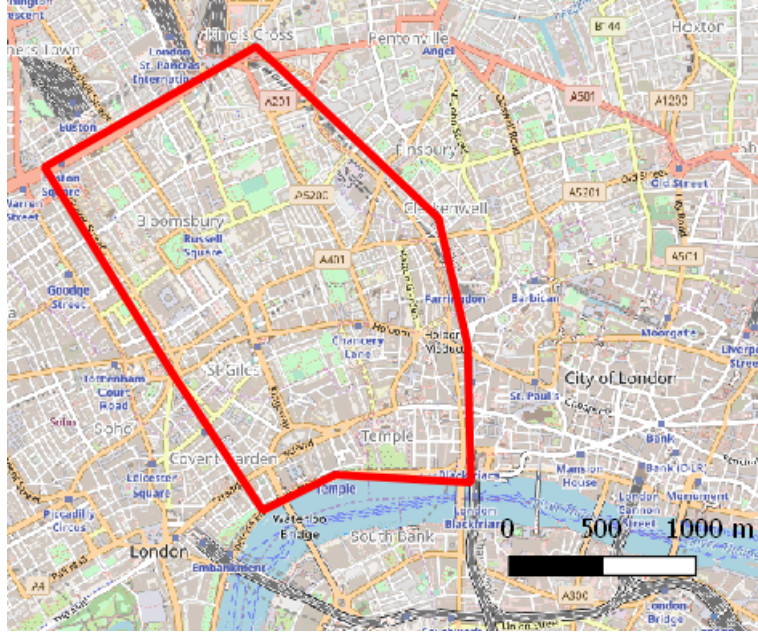

(a) Network exhibit

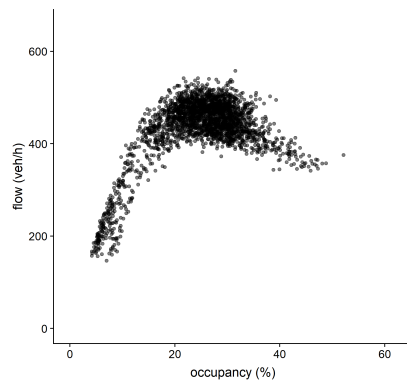

(b) Raw data

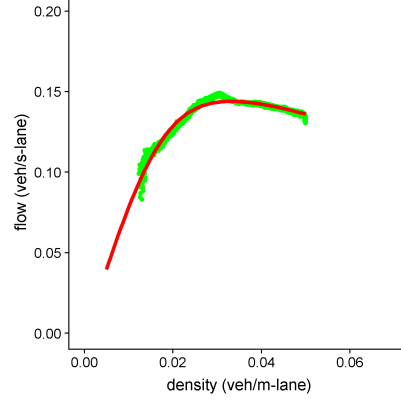

(c) Upper bound and fitted curve

Figure 25: London Region I. (a) shows the network exhibit used for the MFD estimation and calculation of network topology variables. The map is oriented to the north and is obtained from OpenStreetMap. (b) presents the scatter plot of the raw, i.e., unfiltered, data of the network shown in a. This includes all malfunctioning detectors, oversampling of lanes, detectors on residential roads etc. (c) shows the upper-bound of the estimated MFD and the fitted curve based on the log-exp function by Ambühl et al. (2018). Flow and density are per lane. Occupancy is in the interval 0 to 1 and means the fraction of time in the observation interval a detector is covered by vehicles, i.e., it approximates density.

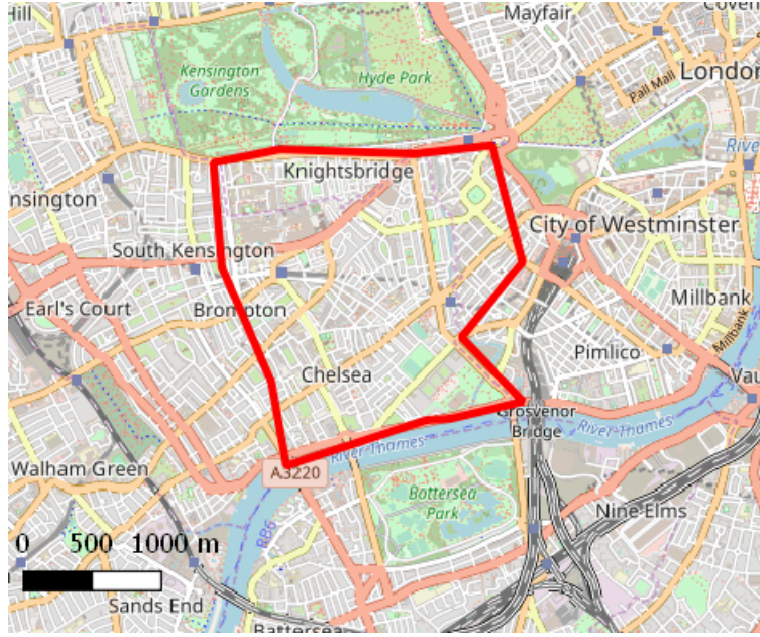

(a) Network exhibit

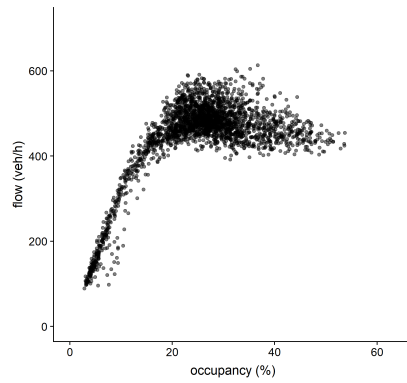

(b) Raw data

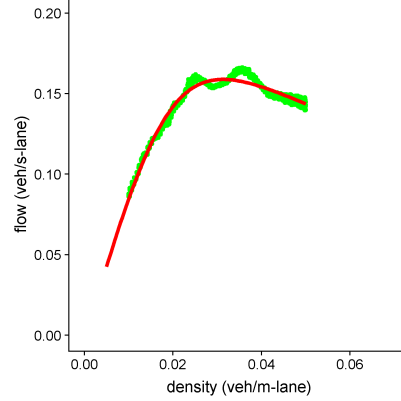

(c) Upper bound and fitted curve

Figure 26: London Region II. (a) shows the network exhibit used for the MFD estimation and calculation of network topology variables. The map is oriented to the north and is obtained from OpenStreetMap. (b) presents the scatter plot of the raw, i.e., unfiltered, data of the network shown in a. This includes all malfunctioning detectors, oversampling of lanes, detectors on residential roads etc. (c) shows the upper-bound of the estimated MFD and the fitted curve based on the log-exp function by Ambühl et al. (2018). Flow and density are per lane. Occupancy is in the interval 0 to 1 and means the fraction of time in the observation interval a detector is covered by vehicles, i.e., it approximates density.

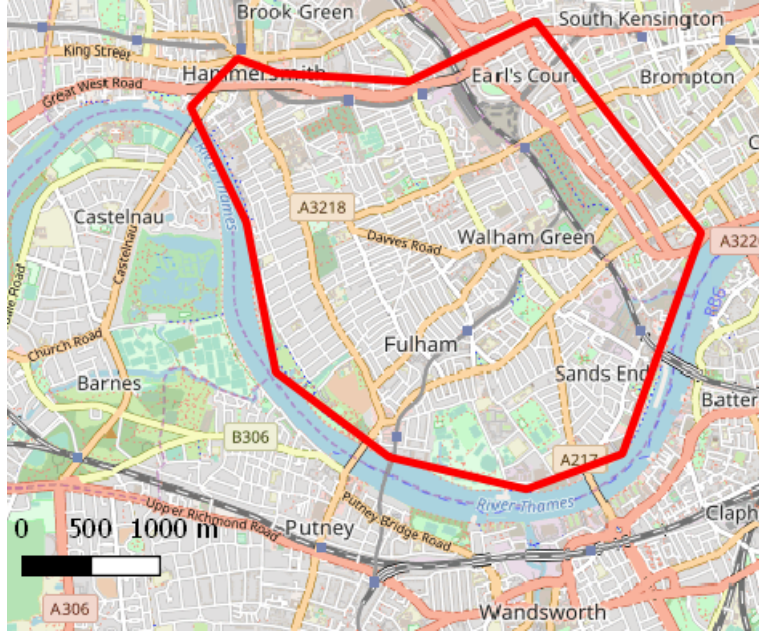

(a) Network exhibit

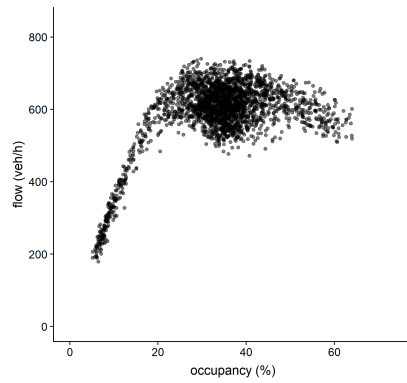

(b) Raw data

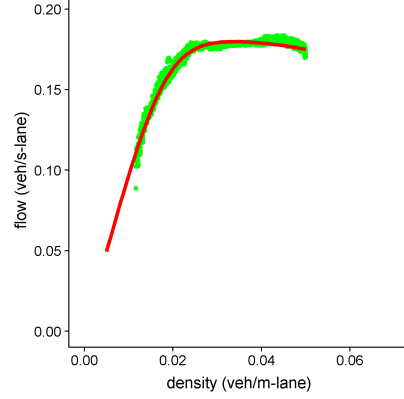

(c) Upper bound and fitted curve

Figure 27: London Region II. (a) shows the network exhibit used for the MFD estimation and calculation of network topology variables. The map is oriented to the north and is obtained from OpenStreetMap. (b) presents the scatter plot of the raw, i.e., unfiltered, data of the network shown in a. This includes all malfunctioning detectors, oversampling of lanes, detectors on residential roads etc. (c) shows the upper-bound of the estimated MFD and the fitted curve based on the log-exp function by Ambühl et al. (2018). Flow and density are per lane. Occupancy is in the interval 0 to 1 and means the fraction of time in the observation interval a detector is covered by vehicles, i.e., it approximates density.

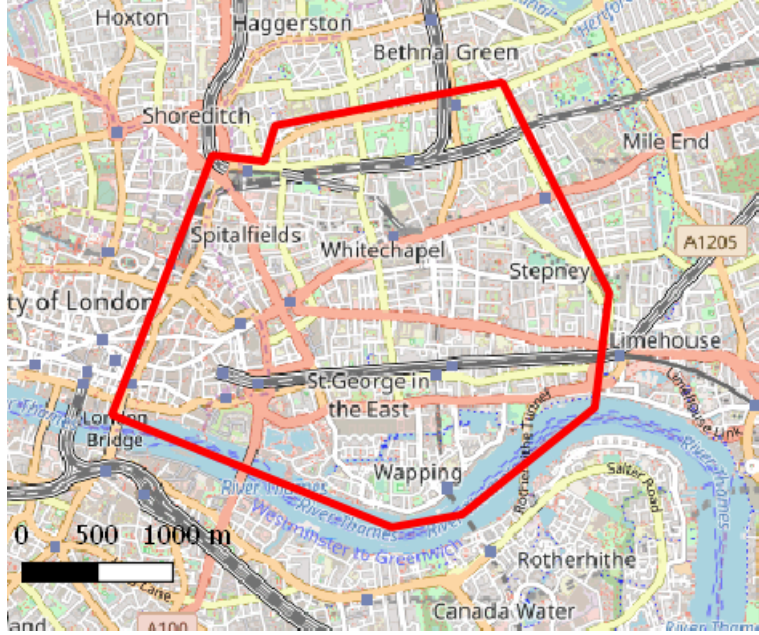

(a) Network exhibit

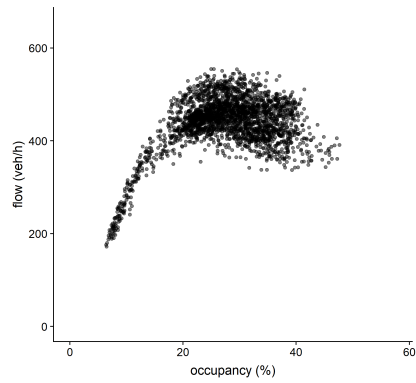

(b) Raw data

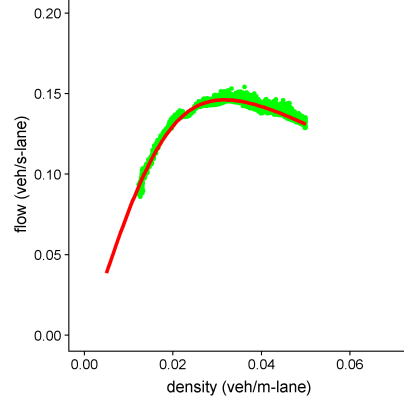

(c) Upper bound and fitted curve

Figure 28: London Region III. (a) shows the network exhibit used for the MFD estimation and calculation of network topology variables. The map is oriented to the north and is obtained from OpenStreetMap. (b) presents the scatter plot of the raw, i.e., unfiltered, data of the network shown in a. This includes all malfunctioning detectors, oversampling of lanes, detectors on residential roads etc. (c) shows the upper-bound of the estimated MFD and the fitted curve based on the log-exp function by Ambühl et al. (2018). Flow and density are per lane. Occupancy is in the interval 0 to 1 and means the fraction of time in the observation interval a detector is covered by vehicles, i.e., it approximates density.

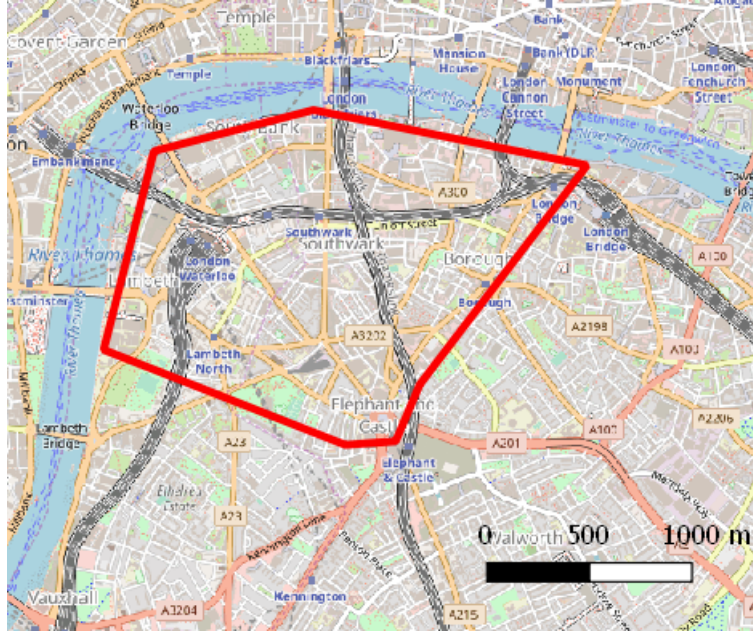

(a) Network exhibit

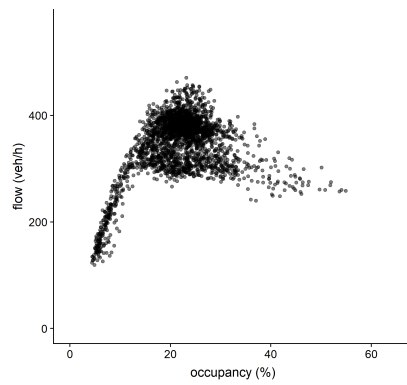

(b) Raw data

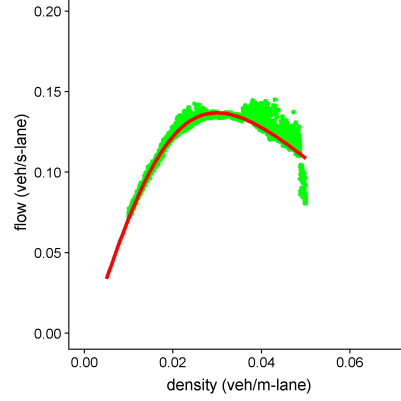

(c) Upper bound and fitted curve

Figure 29: London Region IV. (a) shows the network exhibit used for the MFD estimation and calculation of network topology variables. The map is oriented to the north and is obtained from OpenStreetMap. (b) presents the scatter plot of the raw, i.e., unfiltered, data of the network shown in a. This includes all malfunctioning detectors, oversampling of lanes, detectors on residential roads etc. (c) shows the upper-bound of the estimated MFD and the fitted curve based on the log-exp function by Ambühl et al. (2018). Flow and density are per lane. Occupancy is in the interval 0 to 1 and means the fraction of time in the observation interval a detector is covered by vehicles, i.e., it approximates density.

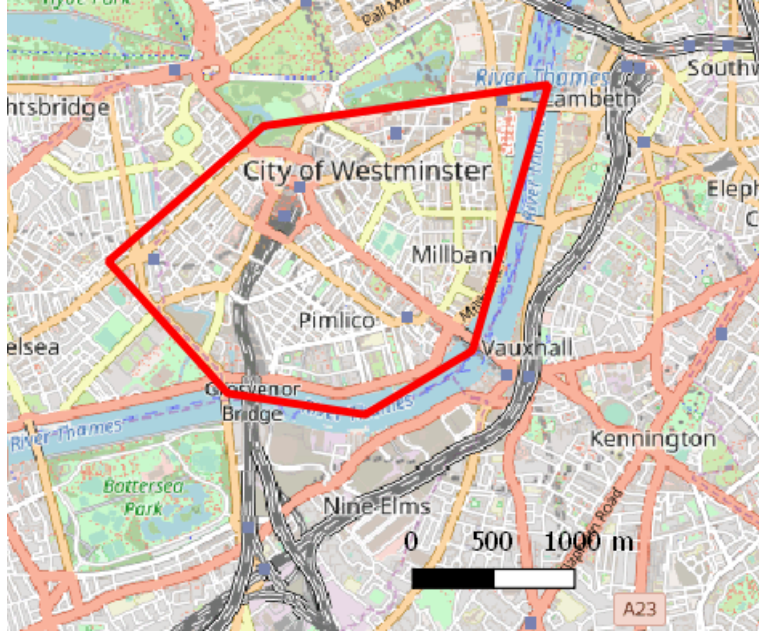

(a) Network exhibit

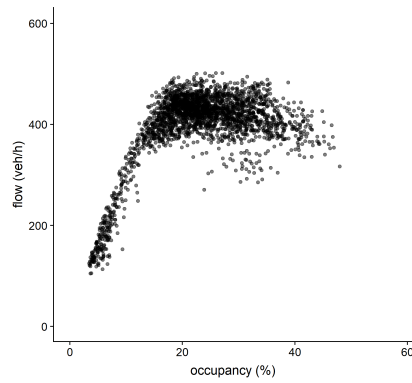

(b) Raw data

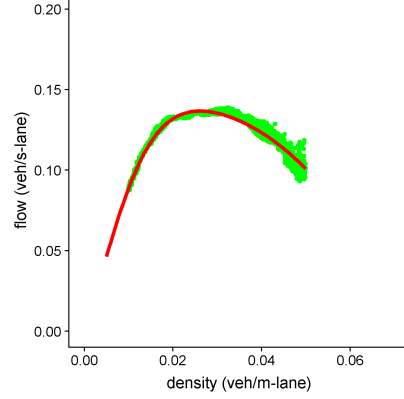

(c) Upper bound and fitted curve

Figure 30: London Region V. (a) shows the network exhibit used for the MFD estimation and calculation of network topology variables. The map is oriented to the north and is obtained from OpenStreetMap. (b) presents the scatter plot of the raw, i.e., unfiltered, data of the network shown in a. This includes all malfunctioning detectors, oversampling of lanes, detectors on residential roads etc. (c) shows the upper-bound of the estimated MFD and the fitted curve based on the log-exp function by Ambühl et al. (2018). Flow and density are per lane. Occupancy is in the interval 0 to 1 and means the fraction of time in the observation interval a detector is covered by vehicles, i.e., it approximates density.

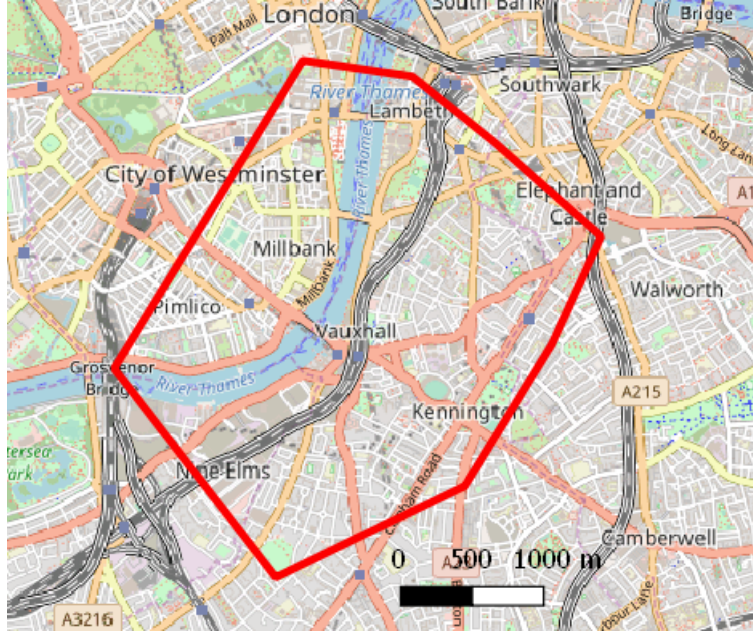

(a) Network exhibit

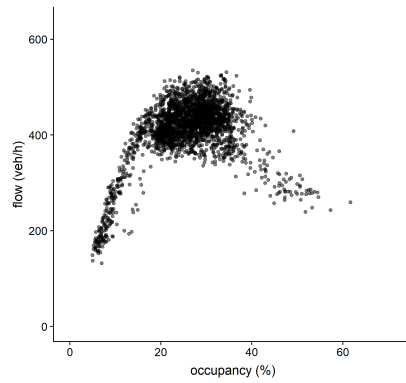

(b) Raw data

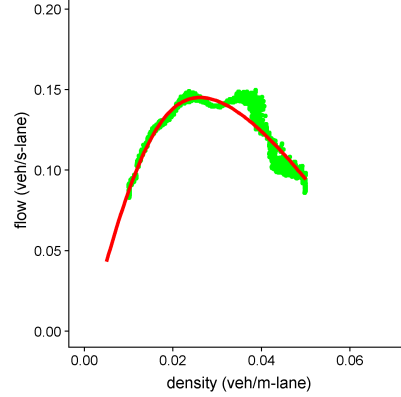

(c) Upper bound and fitted curve

Figure 31: London Region VI. (a) shows the network exhibit used for the MFD estimation and calculation of network topology variables. The map is oriented to the north and is obtained from OpenStreetMap. (b) presents the scatter plot of the raw, i.e., unfiltered, data of the network shown in a. This includes all malfunctioning detectors, oversampling of lanes, detectors on residential roads etc. (c) shows the upper-bound of the estimated MFD and the fitted curve based on the log-exp function by Ambühl et al. (2018). Flow and density are per lane. Occupancy is in the interval 0 to 1 and means the fraction of time in the observation interval a detector is covered by vehicles, i.e., it approximates density.

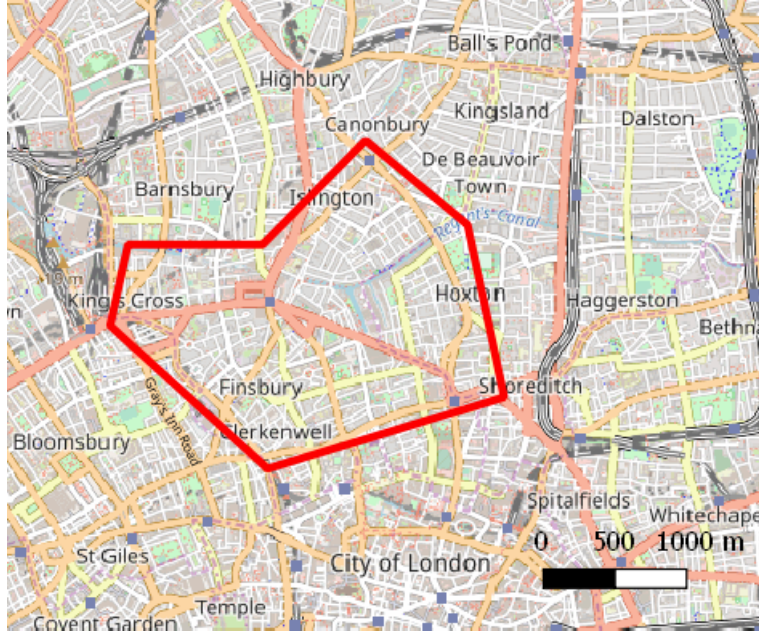

(a) Network exhibit

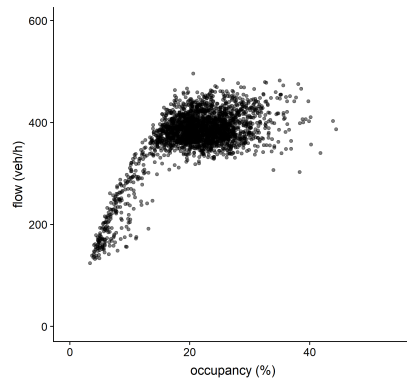

(b) Raw data

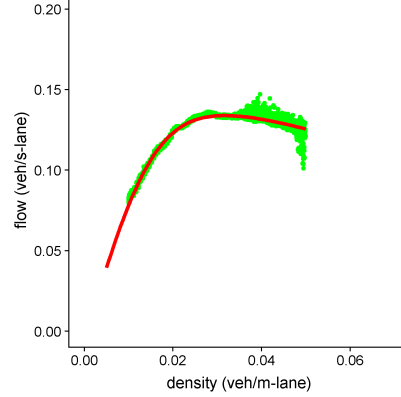

(c) Upper bound and fitted curve

Figure 32: London Region VII. (a) shows the network exhibit used for the MFD estimation and calculation of network topology variables. The map is oriented to the north and is obtained from OpenStreetMap. (b) presents the scatter plot of the raw, i.e., unfiltered, data of the network shown in a. This includes all malfunctioning detectors, oversampling of lanes, detectors on residential roads etc. (c) shows the upper-bound of the estimated MFD and the fitted curve based on the log-exp function by Ambühl et al. (2018). Flow and density are per lane. Occupancy is in the interval 0 to 1 and means the fraction of time in the observation interval a detector is covered by vehicles, i.e., it approximates density.

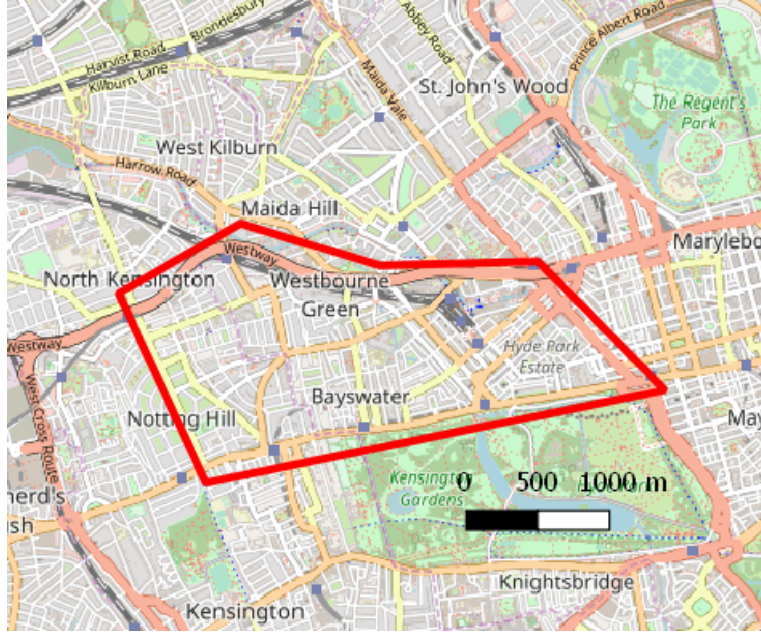

(a) Network exhibit

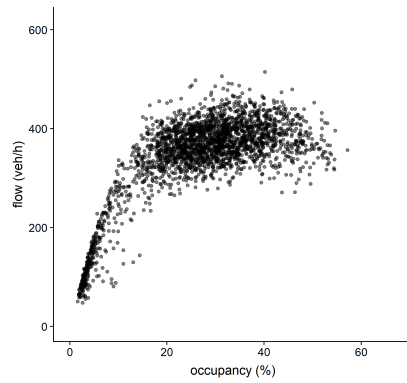

(b) Raw data

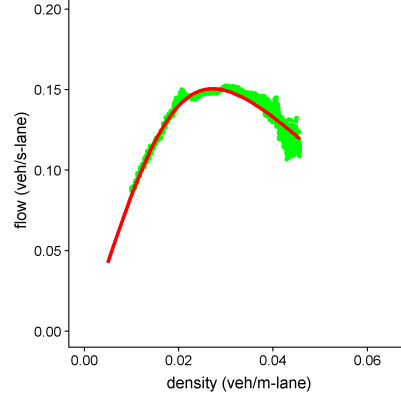

(c) Upper bound and fitted curve

Figure 33: London Region VIII. (a) shows the network exhibit used for the MFD estimation and calculation of network topology variables. The map is oriented to the north and is obtained from OpenStreetMap. (b) presents the scatter plot of the raw, i.e., unfiltered, data of the network shown in a. This includes all malfunctioning detectors, oversampling of lanes, detectors on residential roads etc. (c) shows the upper-bound of the estimated MFD and the fitted curve based on the log-exp function by Ambühl et al. (2018). Flow and density are per lane. Occupancy is in the interval 0 to 1 and means the fraction of time in the observation interval a detector is covered by vehicles, i.e., it approximates density.

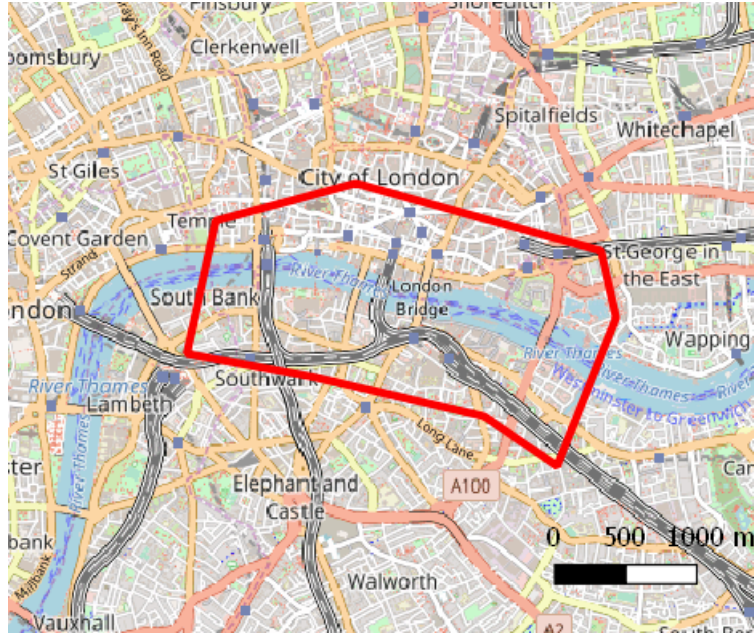

(a) Network exhibit

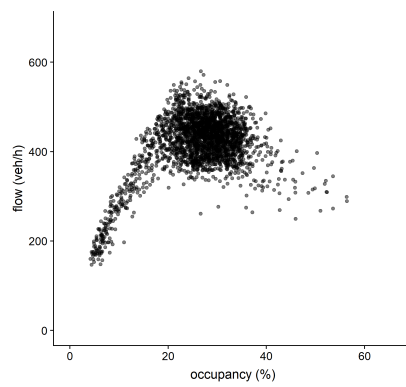

(b) Raw data

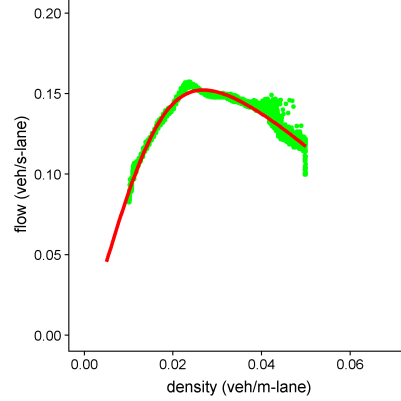

(c) Upper bound and fitted curve

Figure 34: London Region IX. (a) shows the network exhibit used for the MFD estimation and calculation of network topology variables. The map is oriented to the north and is obtained from OpenStreetMap. (b) presents the scatter plot of the raw, i.e., unfiltered, data of the network shown in a. This includes all malfunctioning detectors, oversampling of lanes, detectors on residential roads etc. (c) shows the upper-bound of the estimated MFD and the fitted curve based on the log-exp function by Ambühl et al. (2018). Flow and density are per lane. Occupancy is in the interval 0 to 1 and means the fraction of time in the observation interval a detector is covered by vehicles, i.e., it approximates density.

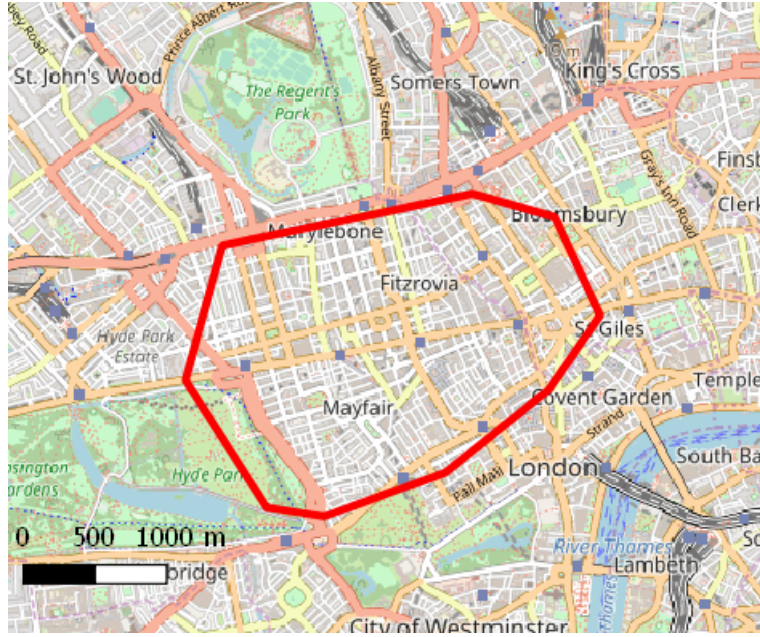

(a) Network exhibit

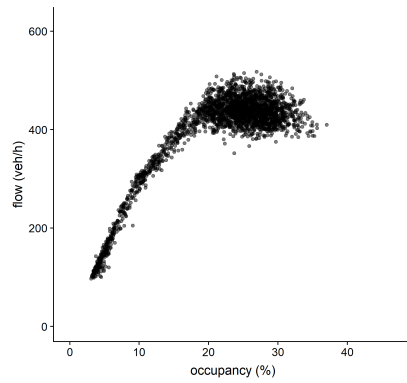

(b) Raw data

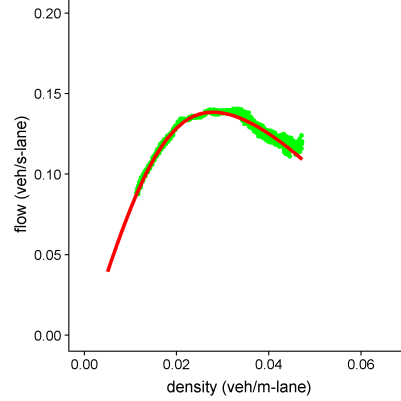

(c) Upper bound and fitted curve

Figure 35: London Region X. (a) shows the network exhibit used for the MFD estimation and calculation of network topology variables. The map is oriented to the north and is obtained from OpenStreetMap. (b) presents the scatter plot of the raw, i.e., unfiltered, data of the network shown in a. This includes all malfunctioning detectors, oversampling of lanes, detectors on residential roads etc. (c) shows the upper-bound of the estimated MFD and the fitted curve based on the log-exp function by Ambühl et al. (2018). Flow and density are per lane. Occupancy is in the interval 0 to 1 and means the fraction of time in the observation interval a detector is covered by vehicles, i.e., it approximates density.

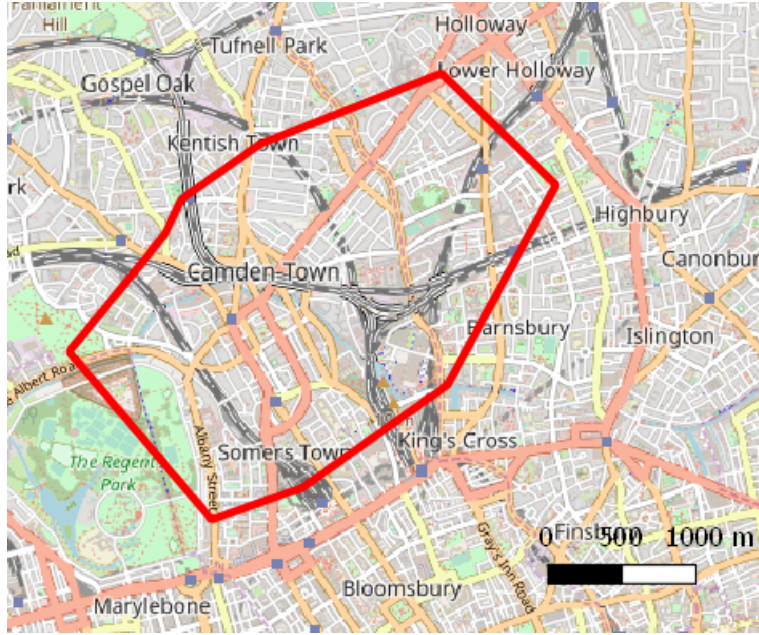

(a) Network exhibit

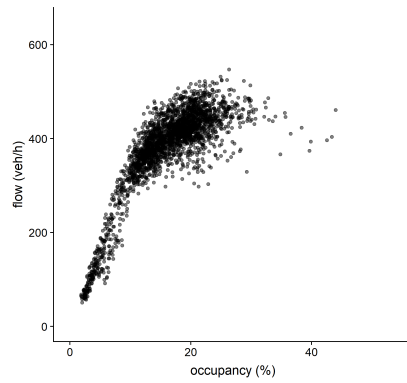

(b) Raw data

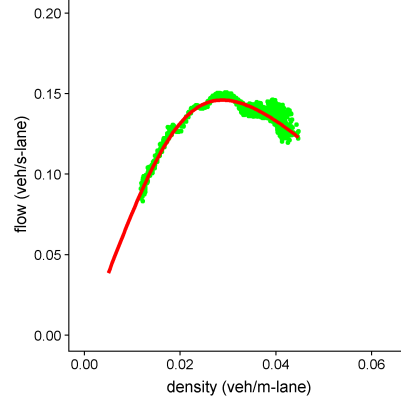

(c) Upper bound and fitted curve

Figure 36: London Region XI. (a) shows the network exhibit used for the MFD estimation and calculation of network topology variables. The map is oriented to the north and is obtained from OpenStreetMap. (b) presents the scatter plot of the raw, i.e., unfiltered, data of the network shown in a. This includes all malfunctioning detectors, oversampling of lanes, detectors on residential roads etc. (c) shows the upper-bound of the estimated MFD and the fitted curve based on the log-exp function by Ambühl et al. (2018). Flow and density are per lane. Occupancy is in the interval 0 to 1 and means the fraction of time in the observation interval a detector is covered by vehicles, i.e., it approximates density.

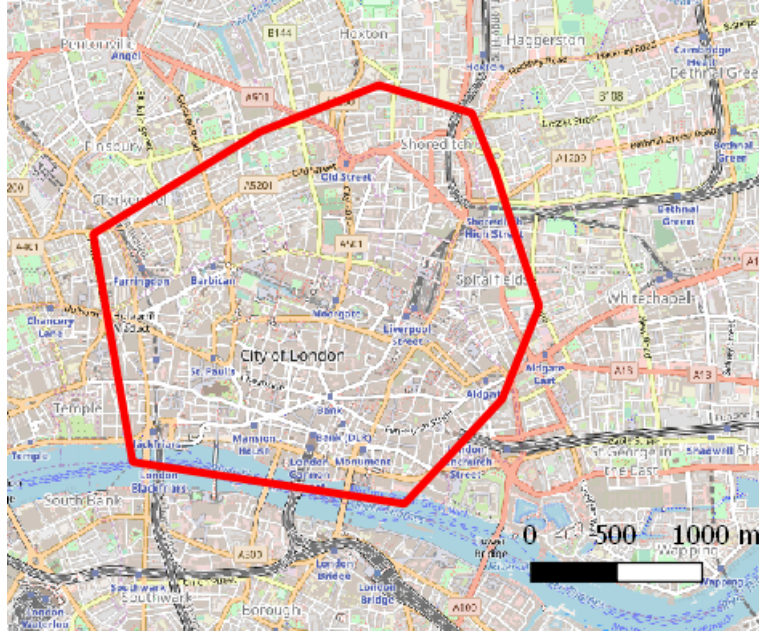

(a) Network exhibit

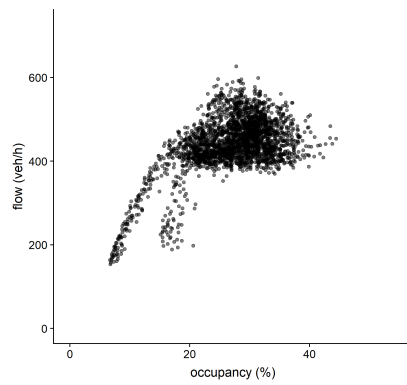

(b) Raw data

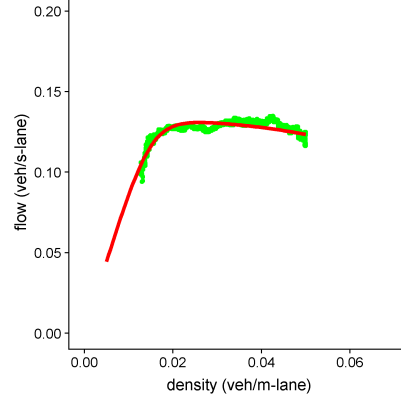

(c) Upper bound and fitted curve

Figure 37: London Region XII. (a) shows the network exhibit used for the MFD estimation and calculation of network topology variables. The map is oriented to the north and is obtained from OpenStreetMap. (b) presents the scatter plot of the raw, i.e., unfiltered, data of the network shown in a. This includes all malfunctioning detectors, oversampling of lanes, detectors on residential roads etc. (c) shows the upper-bound of the estimated MFD and the fitted curve based on the log-exp function by Ambühl et al. (2018). Flow and density are per lane. Occupancy is in the interval 0 to 1 and means the fraction of time in the observation interval a detector is covered by vehicles, i.e., it approximates density.

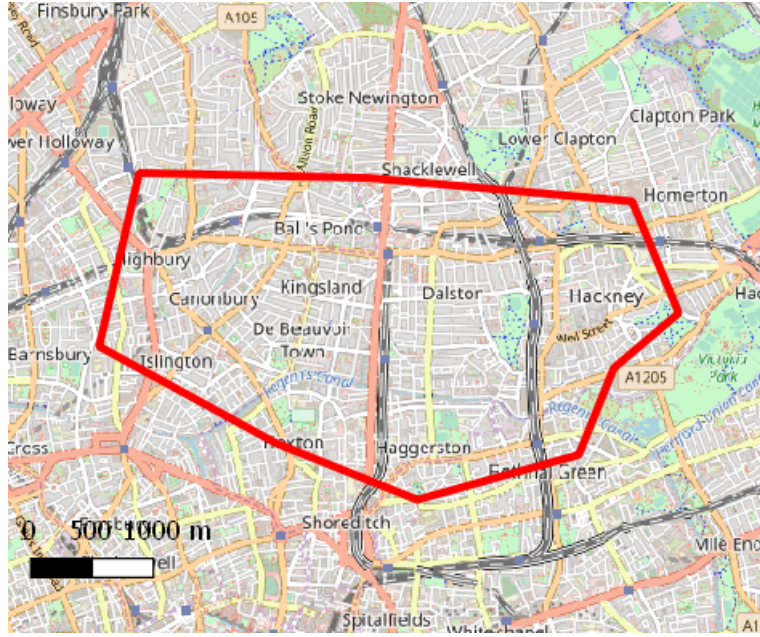

(a) Network exhibit

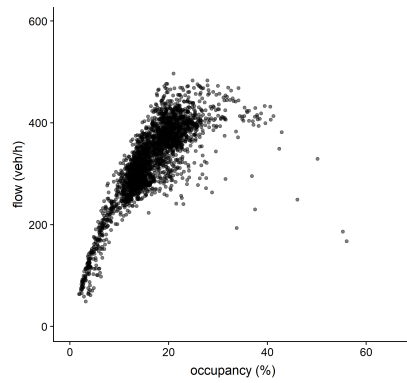

(b) Raw data

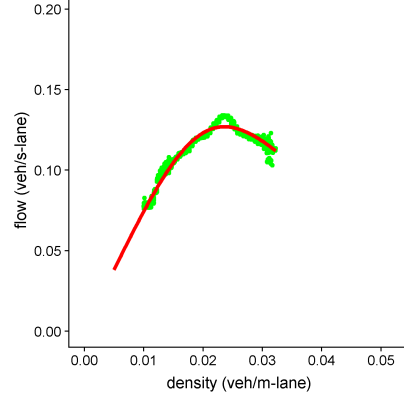

(c) Upper bound and fitted curve

Figure 38: London Region XIII. (a) shows the network exhibit used for the MFD estimation and calculation of network topology variables. The map is oriented to the north and is obtained from OpenStreetMap. (b) presents the scatter plot of the raw, i.e., unfiltered, data of the network shown in a. This includes all malfunctioning detectors, oversampling of lanes, detectors on residential roads etc. (c) shows the upper-bound of the estimated MFD and the fitted curve based on the log-exp function by Ambühl et al. (2018). Flow and density are per lane. Occupancy is in the interval 0 to 1 and means the fraction of time in the observation interval a detector is covered by vehicles, i.e., it approximates density.

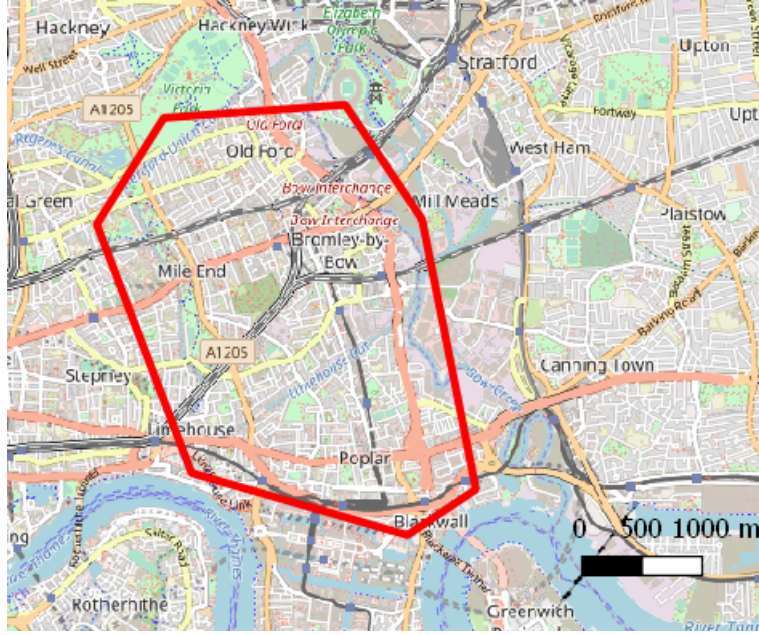

(a) Network exhibit

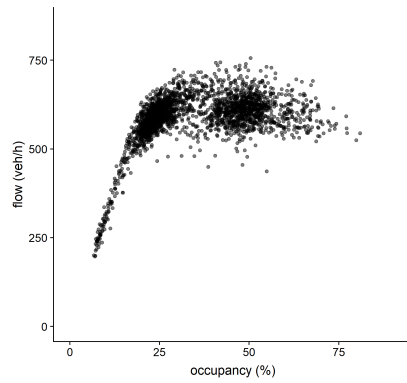

(b) Raw data

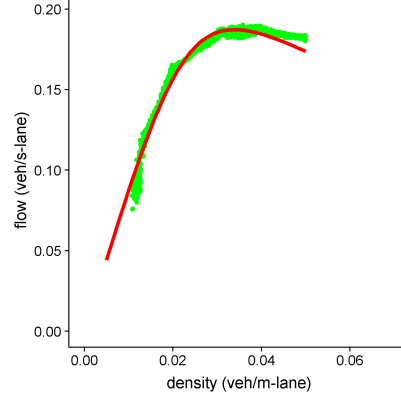

(c) Upper bound and fitted curve

Figure 39: London Region XIV. (a) shows the network exhibit used for the MFD estimation and calculation of network topology variables. The map is oriented to the north and is obtained from OpenStreetMap. (b) presents the scatter plot of the raw, i.e., unfiltered, data of the network shown in a. This includes all malfunctioning detectors, oversampling of lanes, detectors on residential roads etc. (c) shows the upper-bound of the estimated MFD and the fitted curve based on the log-exp function by Ambühl et al. (2018). Flow and density are per lane. Occupancy is in the interval 0 to 1 and means the fraction of time in the observation interval a detector is covered by vehicles, i.e., it approximates density.

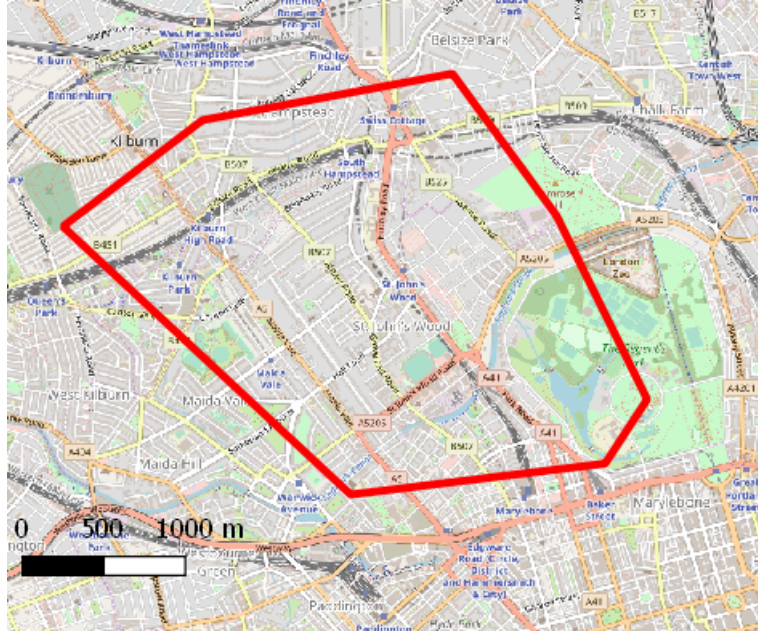

(a) Network exhibit

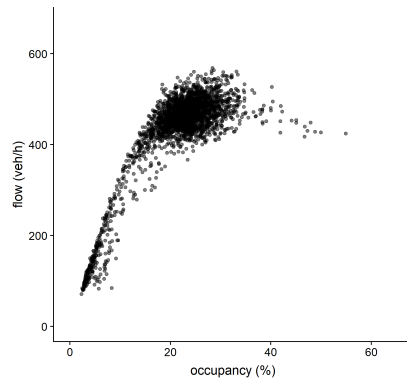

(b) Raw data

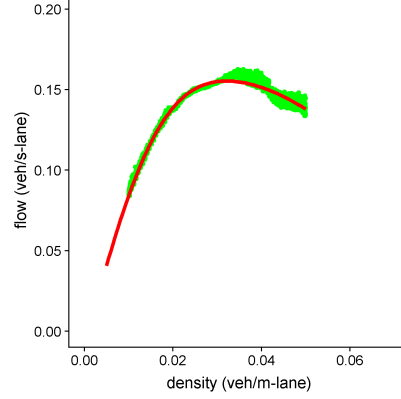

(c) Upper bound and fitted curve

Figure 40: London Region XV. (a) shows the network exhibit used for the MFD estimation and calculation of network topology variables. The map is oriented to the north and is obtained from OpenStreetMap. (b) presents the scatter plot of the raw, i.e., unfiltered, data of the network shown in a. This includes all malfunctioning detectors, oversampling of lanes, detectors on residential roads etc. (c) shows the upper-bound of the estimated MFD and the fitted curve based on the log-exp function by Ambühl et al. (2018). Flow and density are per lane. Occupancy is in the interval 0 to 1 and means the fraction of time in the observation interval a detector is covered by vehicles, i.e., it approximates density.

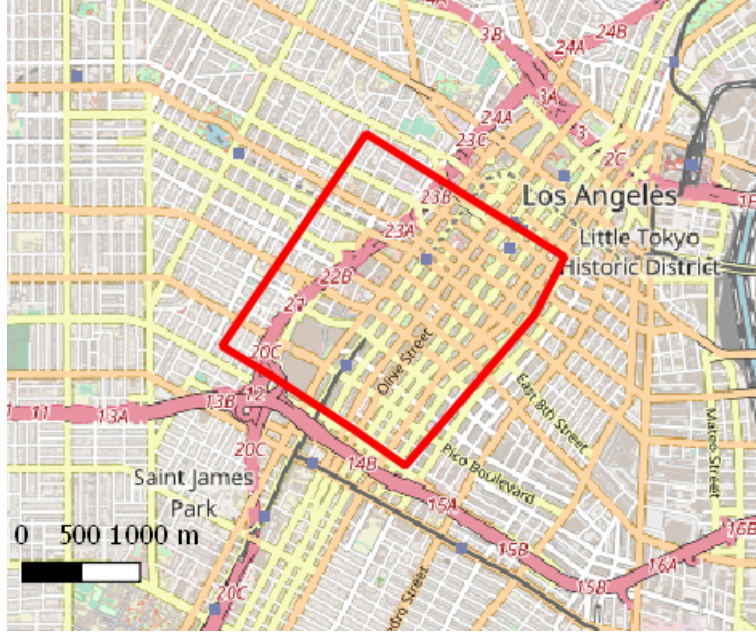

(a) Network exhibit

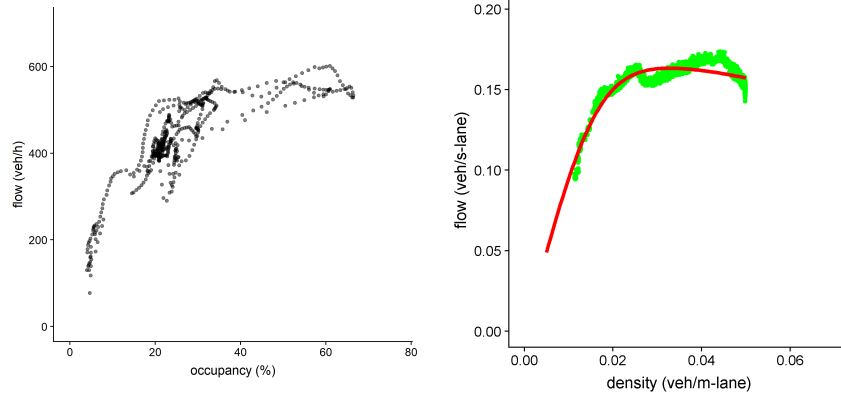

(b) Raw data

(c) Upper bound and fitted curve

Figure 41: Los Angeles Region I. (a) shows the network exhibit used for the MFD estimation and calculation of network topology variables. The map is oriented to the north and is obtained from OpenStreetMap. (b) presents the scatter plot of the raw, i.e., unfiltered, data of the network shown in a. This includes all malfunctioning detectors, oversampling of lanes, detectors on residential roads etc. (c) shows the upper-bound of the estimated MFD and the fitted curve based on the log-exp function by Ambühl et al. (2018). Flow and density are per lane. Occupancy is in the interval 0 to 1 and means the fraction of time in the observation interval a detector is covered by vehicles, i.e., it approximates density.

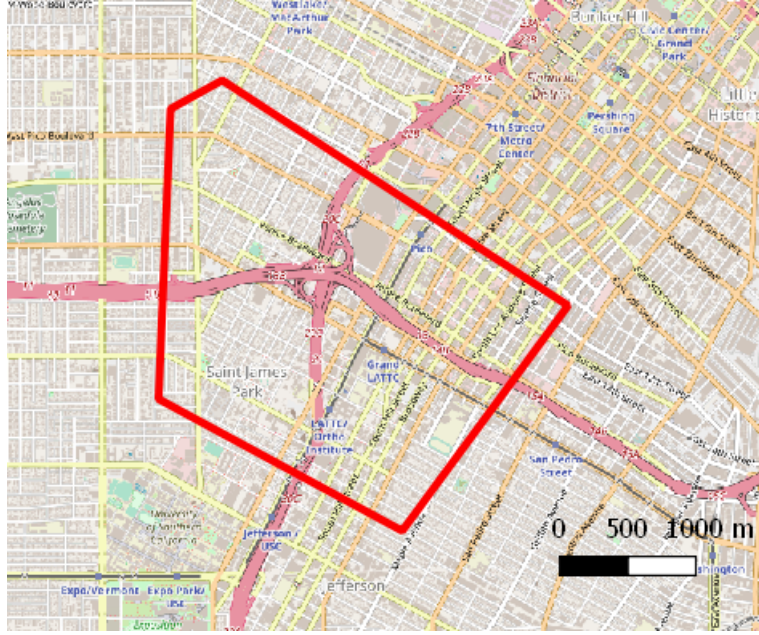

(a) Network exhibit

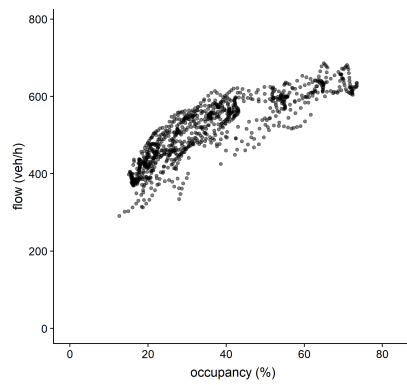

(b) Raw data

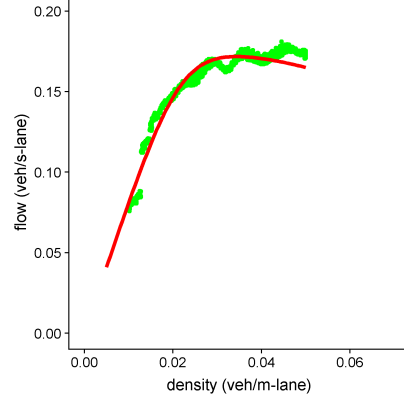

(c) Upper bound and fitted curve

Figure 42: Los Angeles Region II. (a) shows the network exhibit used for the MFD estimation and calculation of network topology variables. The map is oriented to the north and is obtained from OpenStreetMap. (b) presents the scatter plot of the raw, i.e., unfiltered, data of the network shown in a. This includes all malfunctioning detectors, oversampling of lanes, detectors on residential roads etc. (c) shows the upper-bound of the estimated MFD and the fitted curve based on the log-exp function by Ambühl et al. (2018). Flow and density are per lane. Occupancy is in the interval 0 to 1 and means the fraction of time in the observation interval a detector is covered by vehicles, i.e., it approximates density.

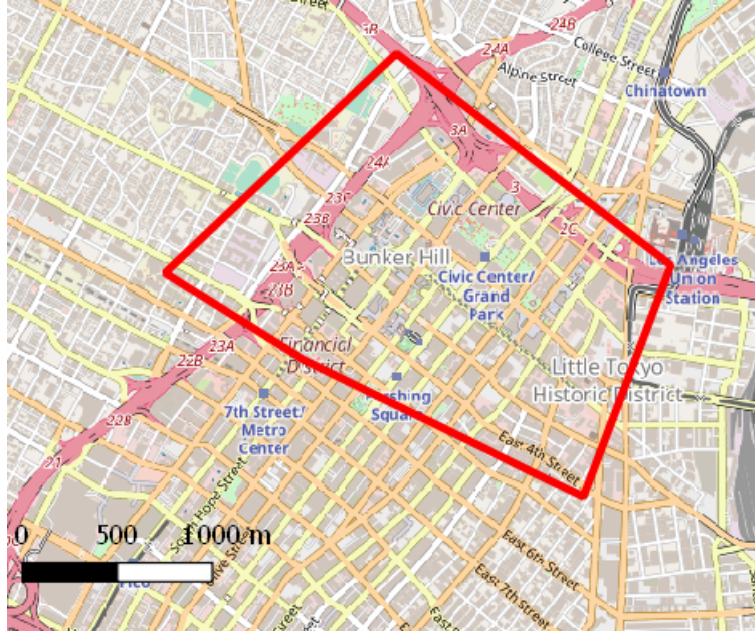

(a) Network exhibit

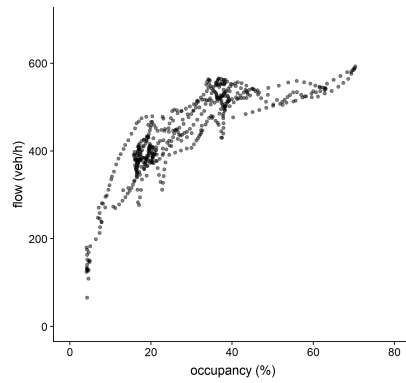

(b) Raw data

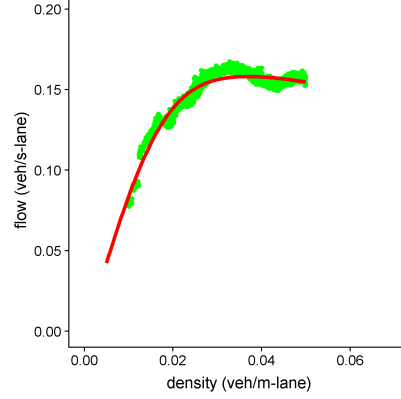

(c) Upper bound and fitted curve

Figure 43: Los Angeles Region III. (a) shows the network exhibit used for the MFD estimation and calculation of network topology variables. The map is oriented to the north and is obtained from OpenStreetMap. (b) presents the scatter plot of the raw, i.e., unfiltered, data of the network shown in a. This includes all malfunctioning detectors, oversampling of lanes, detectors on residential roads etc. (c) shows the upper-bound of the estimated MFD and the fitted curve based on the log-exp function by Ambühl et al. (2018). Flow and density are per lane. Occupancy is in the interval 0 to 1 and means the fraction of time in the observation interval a detector is covered by vehicles, i.e., it approximates density.

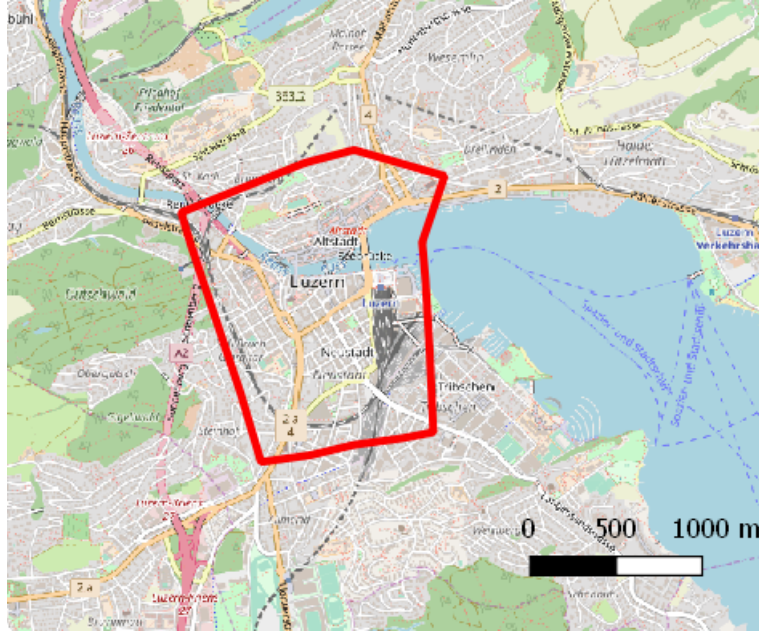

(a) Network exhibit

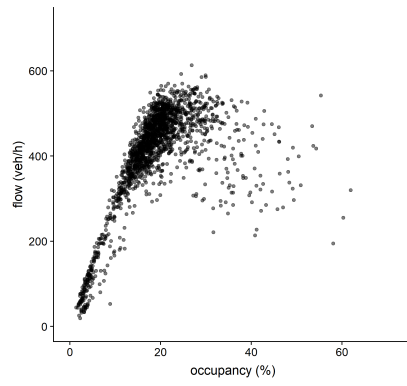

(b) Raw data

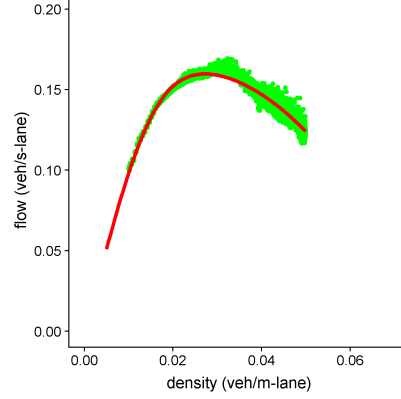

(c) Upper bound and fitted curve

Figure 44: Lucerne Region I. (a) shows the network exhibit used for the MFD estimation and calculation of network topology variables. The map is oriented to the north and is obtained from OpenStreetMap. (b) presents the scatter plot of the raw, i.e., unfiltered, data of the network shown in a. This includes all malfunctioning detectors, oversampling of lanes, detectors on residential roads etc. (c) shows the upper-bound of the estimated MFD and the fitted curve based on the log-exp function by Ambühl et al. (2018). Flow and density are per lane. Occupancy is in the interval 0 to 1 and means the fraction of time in the observation interval a detector is covered by vehicles, i.e., it approximates density.

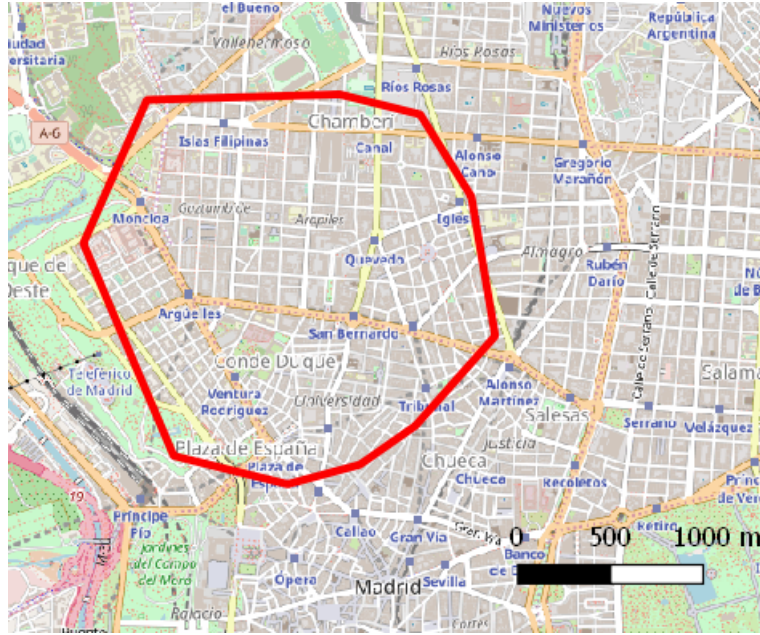

(a) Network exhibit

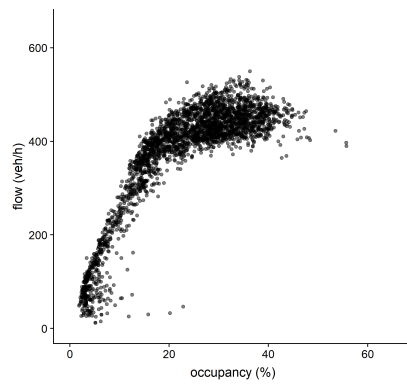

(b) Raw data

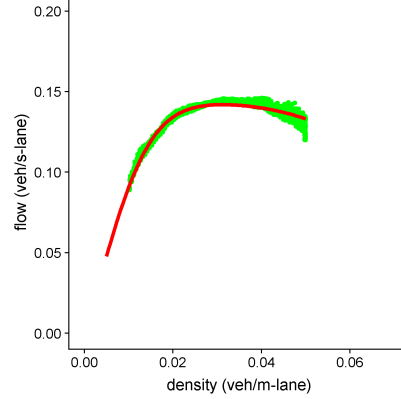

(c) Upper bound and fitted curve

Figure 45: Madrid Region I. (a) shows the network exhibit used for the MFD estimation and calculation of network topology variables. The map is oriented to the north and is obtained from OpenStreetMap. (b) presents the scatter plot of the raw, i.e., unfiltered, data of the network shown in a. This includes all malfunctioning detectors, oversampling of lanes, detectors on residential roads etc. (c) shows the upper-bound of the estimated MFD and the fitted curve based on the log-exp function by Ambühl et al. (2018). Flow and density are per lane. Occupancy is in the interval 0 to 1 and means the fraction of time in the observation interval a detector is covered by vehicles, i.e., it approximates density.

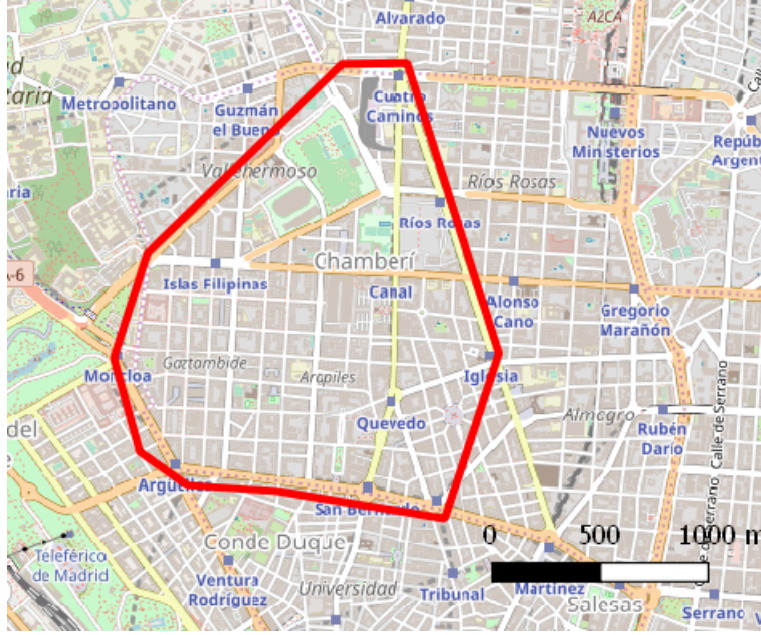

(a) Network exhibit

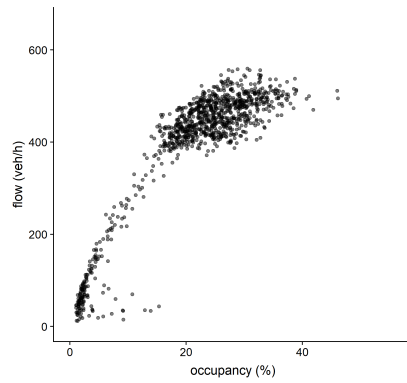

(b) Raw data

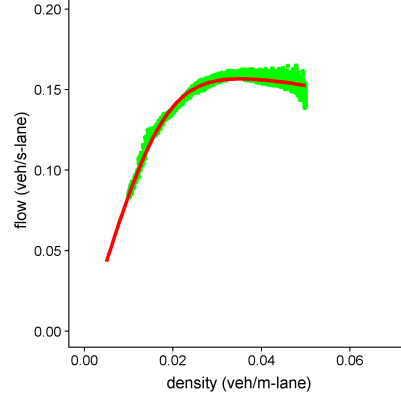

(c) Upper bound and fitted curve

Figure 46: Madrid Region II. (a) shows the network exhibit used for the MFD estimation and calculation of network topology variables. The map is oriented to the north and is obtained from OpenStreetMap. (b) presents the scatter plot of the raw, i.e., unfiltered, data of the network shown in a. This includes all malfunctioning detectors, oversampling of lanes, detectors on residential roads etc. (c) shows the upper-bound of the estimated MFD and the fitted curve based on the log-exp function by Ambühl et al. (2018). Flow and density are per lane. Occupancy is in the interval 0 to 1 and means the fraction of time in the observation interval a detector is covered by vehicles, i.e., it approximates density.

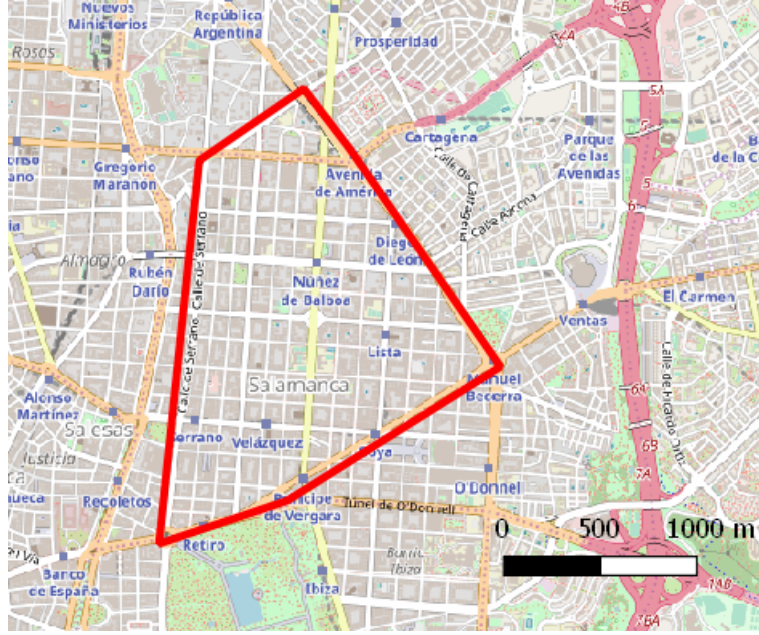

(a) Network exhibit

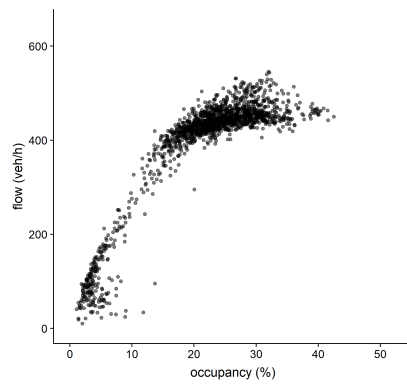

(b) Raw data

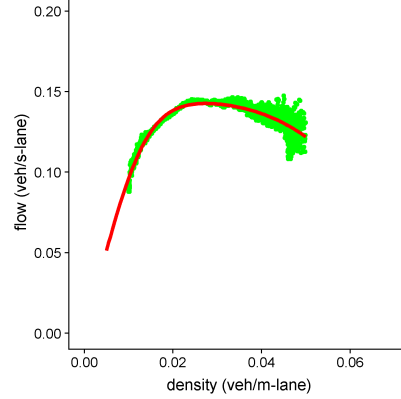

(c) Upper bound and fitted curve

Figure 47: Madrid Region III. (a) shows the network exhibit used for the MFD estimation and calculation of network topology variables. The map is oriented to the north and is obtained from OpenStreetMap. (b) presents the scatter plot of the raw, i.e., unfiltered, data of the network shown in a. This includes all malfunctioning detectors, oversampling of lanes, detectors on residential roads etc. (c) shows the upper-bound of the estimated MFD and the fitted curve based on the log-exp function by Ambühl et al. (2018). Flow and density are per lane. Occupancy is in the interval 0 to 1 and means the fraction of time in the observation interval a detector is covered by vehicles, i.e., it approximates density.

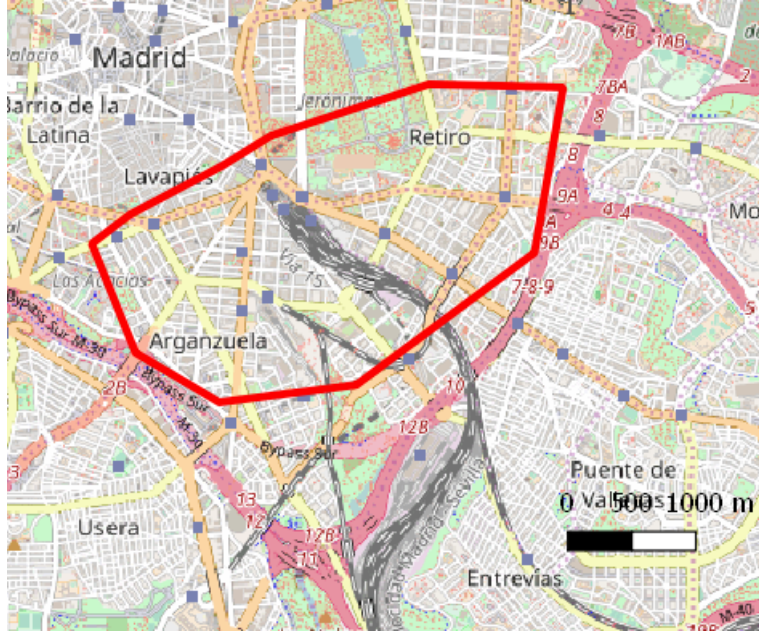

(a) Network exhibit

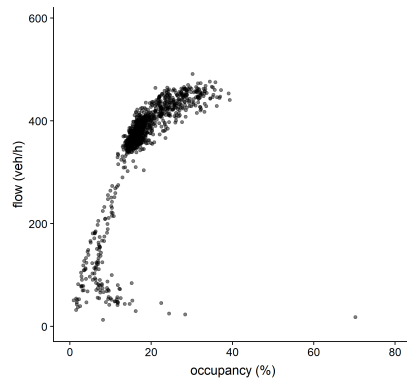

(b) Raw data

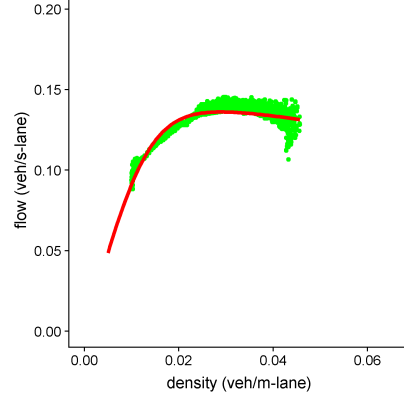

(c) Upper bound and fitted curve

Figure 48: Madrid Region IV. (a) shows the network exhibit used for the MFD estimation and calculation of network topology variables. The map is oriented to the north and is obtained from OpenStreetMap. (b) presents the scatter plot of the raw, i.e., unfiltered, data of the network shown in a. This includes all malfunctioning detectors, oversampling of lanes, detectors on residential roads etc. (c) shows the upper-bound of the estimated MFD and the fitted curve based on the log-exp function by Ambühl et al. (2018). Flow and density are per lane. Occupancy is in the interval 0 to 1 and means the fraction of time in the observation interval a detector is covered by vehicles, i.e., it approximates density.

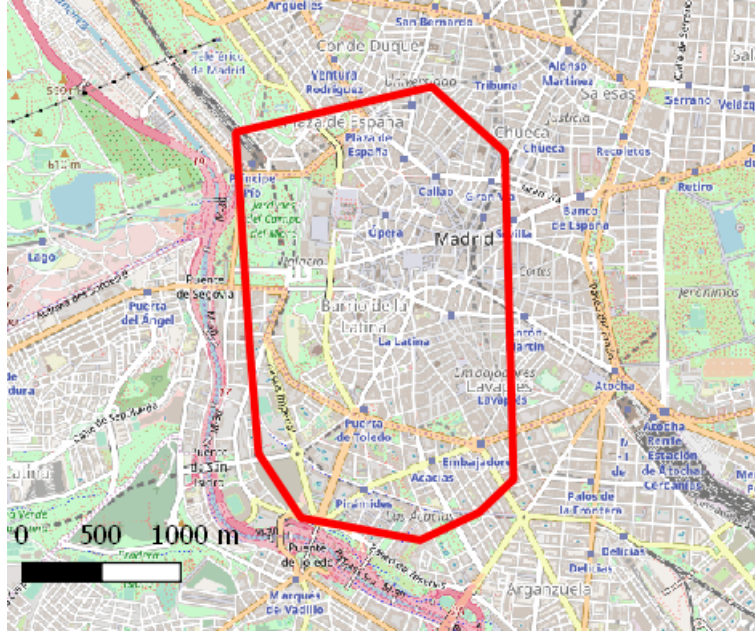

(a) Network exhibit

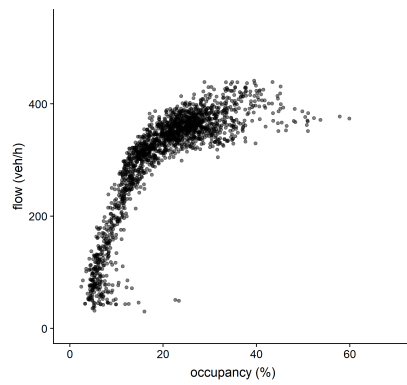

(b) Raw data

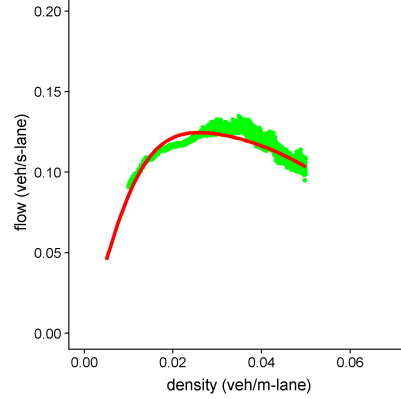

(c) Upper bound and fitted curve

Figure 49: Madrid Region V. (a) shows the network exhibit used for the MFD estimation and calculation of network topology variables. The map is oriented to the north and is obtained from OpenStreetMap. (b) presents the scatter plot of the raw, i.e., unfiltered, data of the network shown in a. This includes all malfunctioning detectors, oversampling of lanes, detectors on residential roads etc. (c) shows the upper-bound of the estimated MFD and the fitted curve based on the log-exp function by Ambühl et al. (2018). Flow and density are per lane. Occupancy is in the interval 0 to 1 and means the fraction of time in the observation interval a detector is covered by vehicles, i.e., it approximates density.

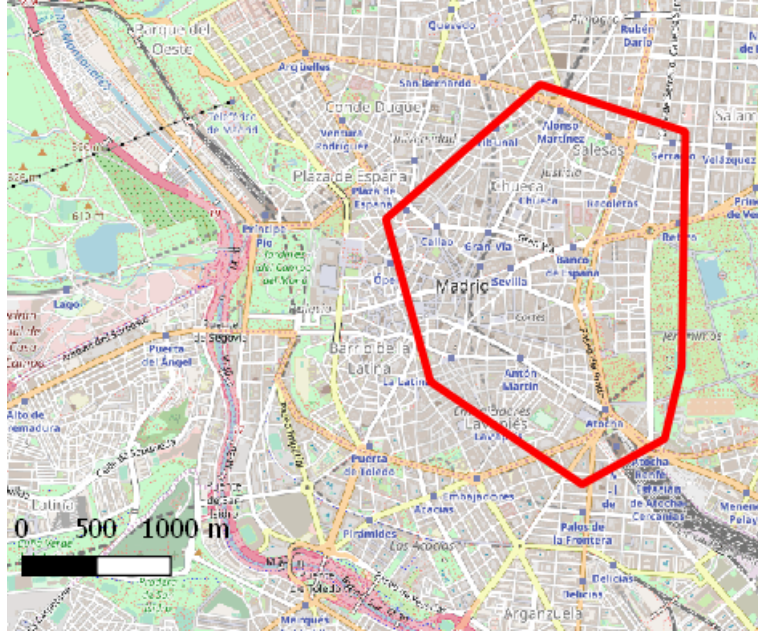

(a) Network exhibit

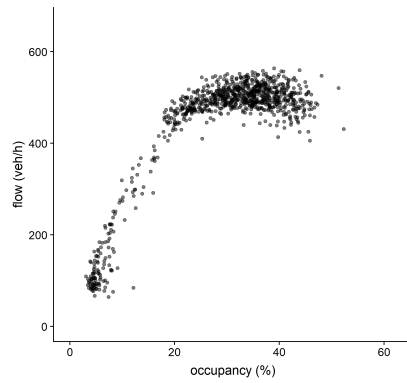

(b) Raw data

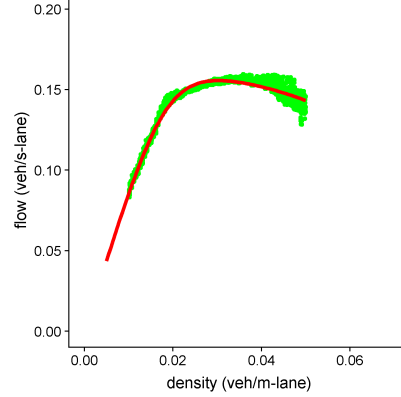

(c) Upper bound and fitted curve

Figure 50: Madrid Region VI. (a) shows the network exhibit used for the MFD estimation and calculation of network topology variables. The map is oriented to the north and is obtained from OpenStreetMap. (b) presents the scatter plot of the raw, i.e., unfiltered, data of the network shown in a. This includes all malfunctioning detectors, oversampling of lanes, detectors on residential roads etc. (c) shows the upper-bound of the estimated MFD and the fitted curve based on the log-exp function by Ambühl et al. (2018). Flow and density are per lane. Occupancy is in the interval 0 to 1 and means the fraction of time in the observation interval a detector is covered by vehicles, i.e., it approximates density.

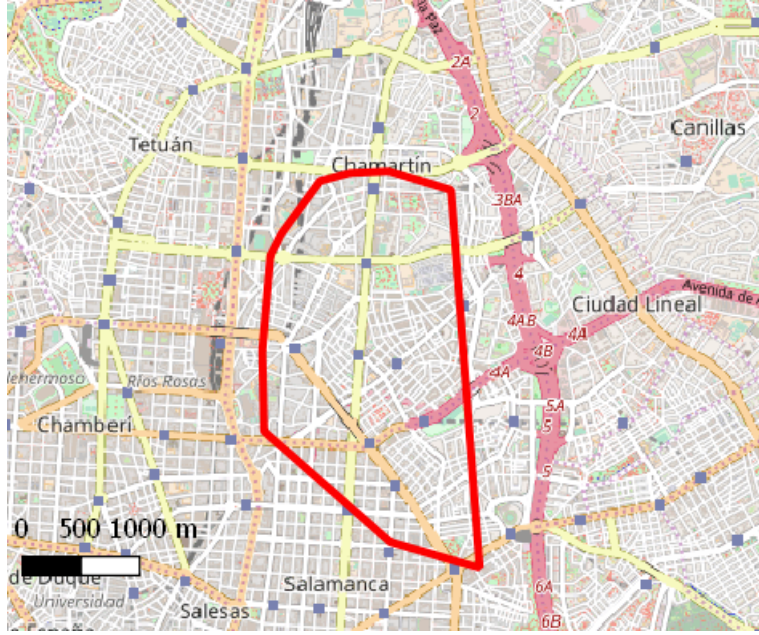

(a) Network exhibit

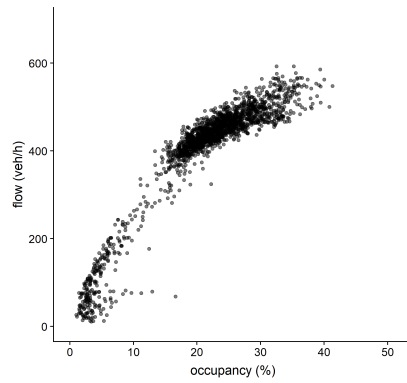

(b) Raw data

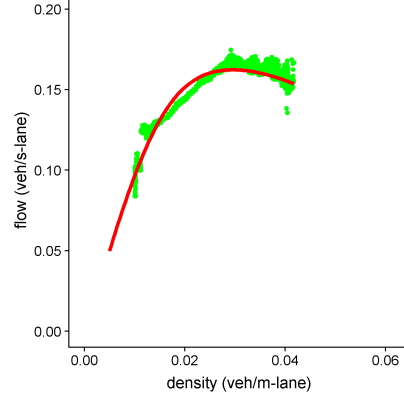

(c) Upper bound and fitted curve

Figure 51: Madrid Region VII. (a) shows the network exhibit used for the MFD estimation and calculation of network topology variables. The map is oriented to the north and is obtained from OpenStreetMap. (b) presents the scatter plot of the raw, i.e., unfiltered, data of the network shown in a. This includes all malfunctioning detectors, oversampling of lanes, detectors on residential roads etc. (c) shows the upper-bound of the estimated MFD and the fitted curve based on the log-exp function by Ambühl et al. (2018). Flow and density are per lane. Occupancy is in the interval 0 to 1 and means the fraction of time in the observation interval a detector is covered by vehicles, i.e., it approximates density.

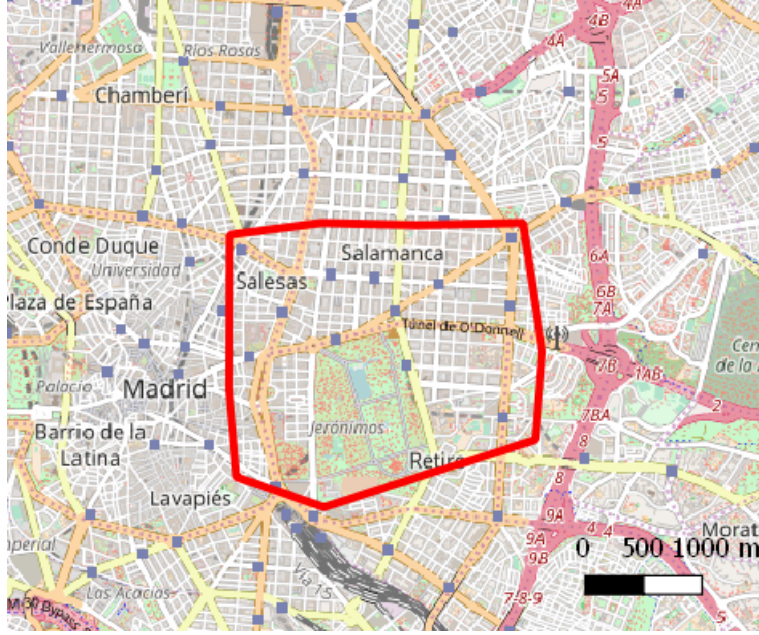

(a) Network exhibit

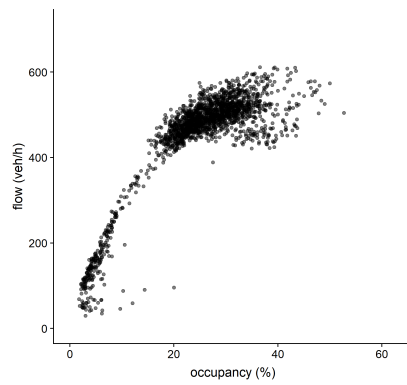

(b) Raw data

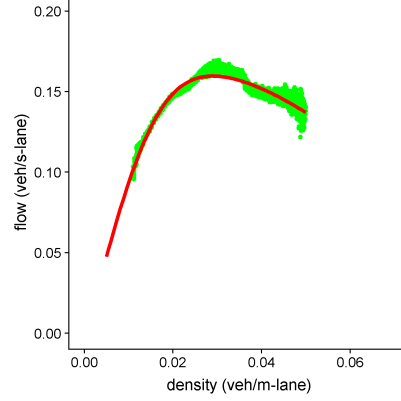

(c) Upper bound and fitted curve

Figure 52: Madrid Region VIII. (a) shows the network exhibit used for the MFD estimation and calculation of network topology variables. The map is oriented to the north and is obtained from OpenStreetMap. (b) presents the scatter plot of the raw, i.e., unfiltered, data of the network shown in a. This includes all malfunctioning detectors, oversampling of lanes, detectors on residential roads etc. (c) shows the upper-bound of the estimated MFD and the fitted curve based on the log-exp function by Ambühl et al. (2018). Flow and density are per lane. Occupancy is in the interval 0 to 1 and means the fraction of time in the observation interval a detector is covered by vehicles, i.e., it approximates density.

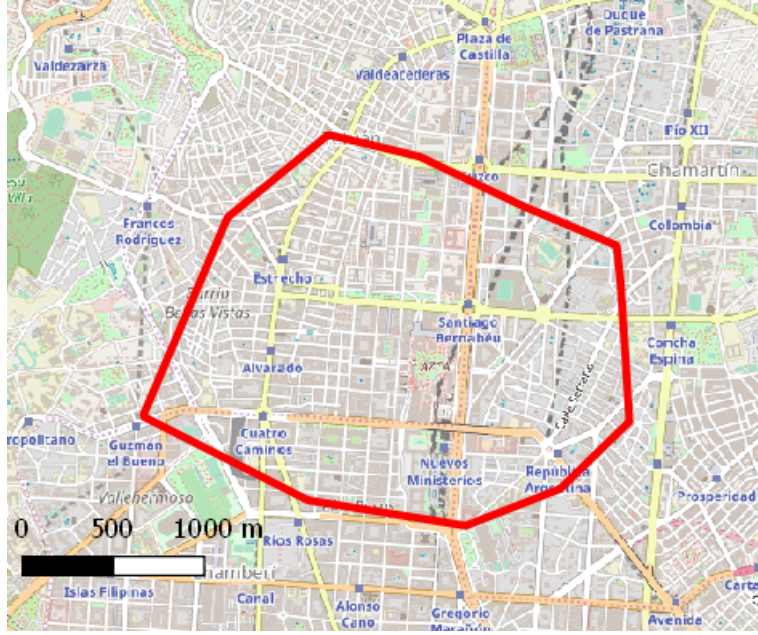

(a) Network exhibit

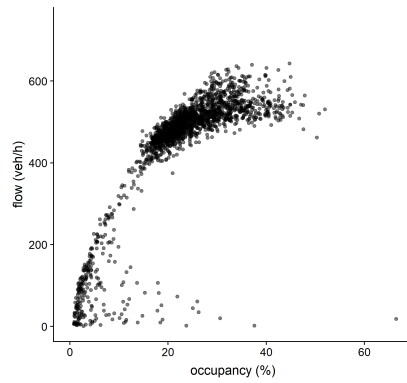

(b) Raw data

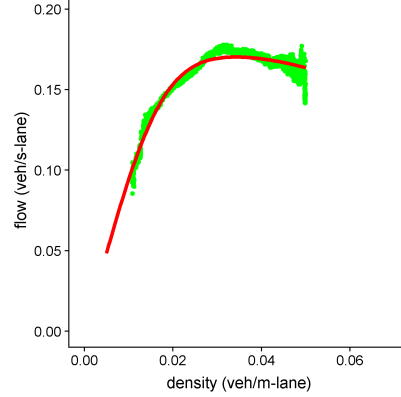

(c) Upper bound and fitted curve

Figure 53: Madrid Region IX. (a) shows the network exhibit used for the MFD estimation and calculation of network topology variables. The map is oriented to the north and is obtained from OpenStreetMap. (b) presents the scatter plot of the raw, i.e., unfiltered, data of the network shown in a. This includes all malfunctioning detectors, oversampling of lanes, detectors on residential roads etc. (c) shows the upper-bound of the estimated MFD and the fitted curve based on the log-exp function by Ambühl et al. (2018). Flow and density are per lane. Occupancy is in the interval 0 to 1 and means the fraction of time in the observation interval a detector is covered by vehicles, i.e., it approximates density.

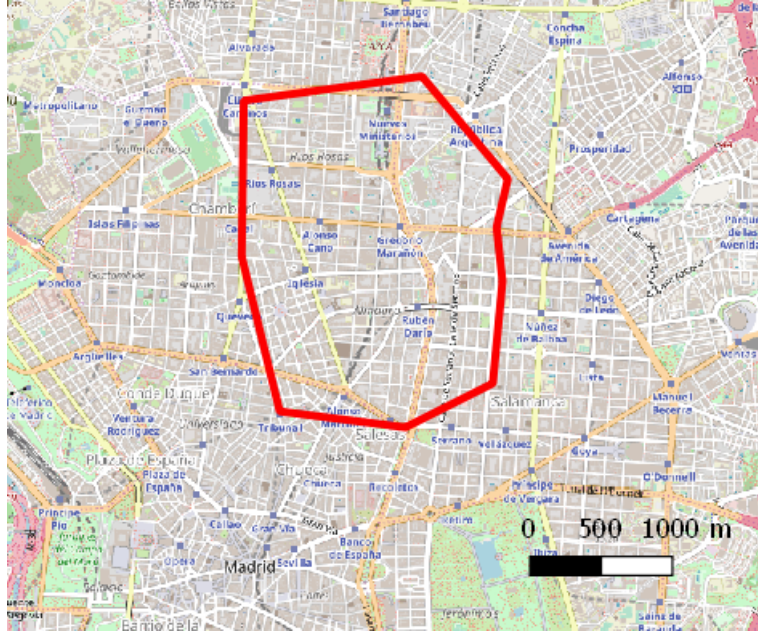

(a) Network exhibit

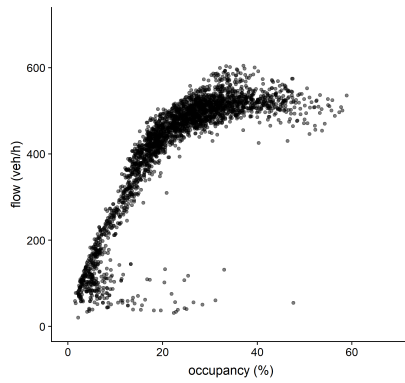

(b) Raw data

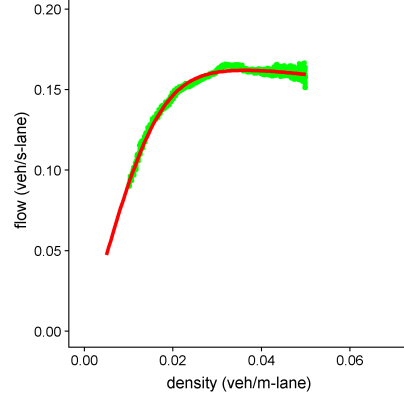

(c) Upper bound and fitted curve

Figure 54: Madrid Region X. (a) shows the network exhibit used for the MFD estimation and calculation of network topology variables. The map is oriented to the north and is obtained from OpenStreetMap. (b) presents the scatter plot of the raw, i.e., unfiltered, data of the network shown in a. This includes all malfunctioning detectors, oversampling of lanes, detectors on residential roads etc. (c) shows the upper-bound of the estimated MFD and the fitted curve based on the log-exp function by Ambühl et al. (2018). Flow and density are per lane. Occupancy is in the interval 0 to 1 and means the fraction of time in the observation interval a detector is covered by vehicles, i.e., it approximates density.

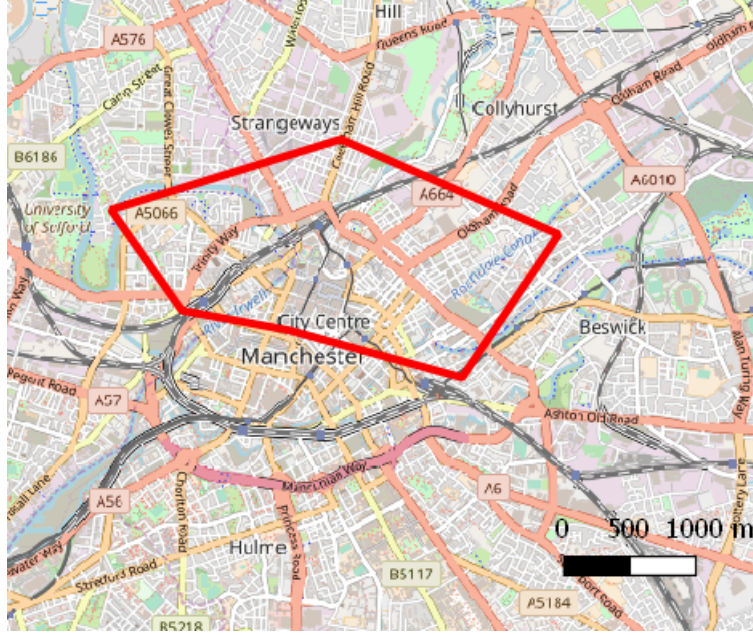

(a) Network exhibit

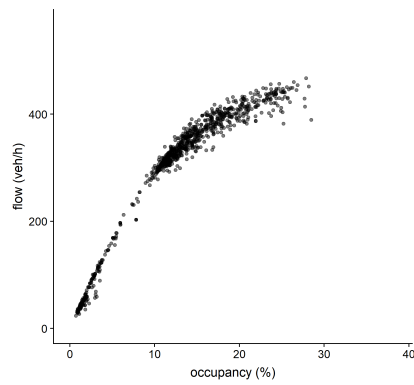

(b) Raw data

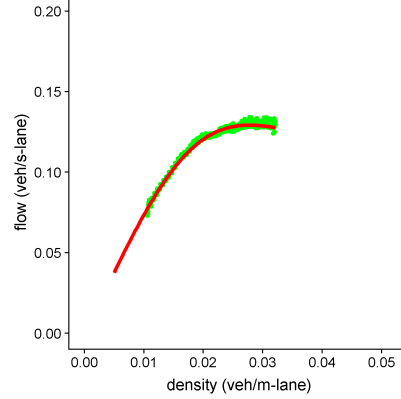

(c) Upper bound and fitted curve

Figure 55: Manchester Region I. (a) shows the network exhibit used for the MFD estimation and calculation of network topology variables. The map is oriented to the north and is obtained from OpenStreetMap. (b) presents the scatter plot of the raw, i.e., unfiltered, data of the network shown in a. This includes all malfunctioning detectors, oversampling of lanes, detectors on residential roads etc. (c) shows the upper-bound of the estimated MFD and the fitted curve based on the log-exp function by Ambühl et al. (2018). Flow and density are per lane. Occupancy is in the interval 0 to 1 and means the fraction of time in the observation interval a detector is covered by vehicles, i.e., it approximates density.

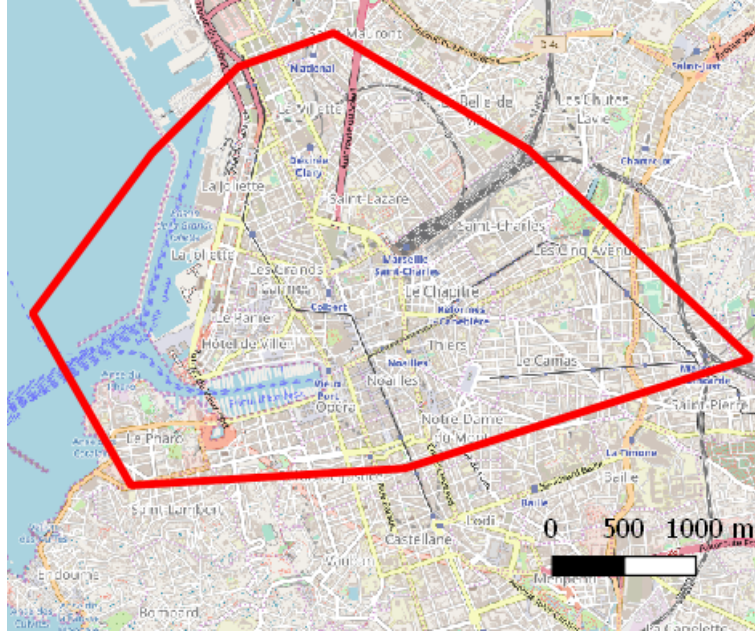

(a) Network exhibit

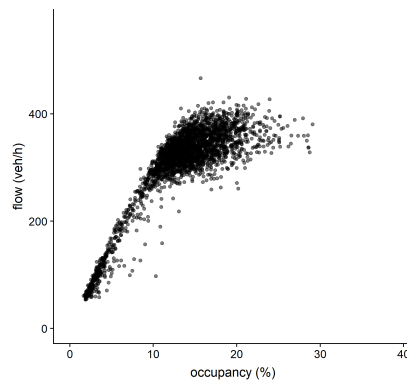

(b) Raw data

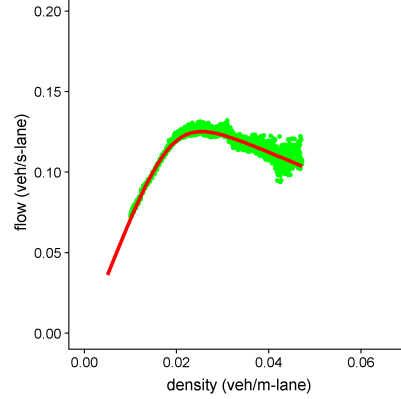

(c) Upper bound and fitted curve

Figure 56: Marseille Region I. (a) shows the network exhibit used for the MFD estimation and calculation of network topology variables. The map is oriented to the north and is obtained from OpenStreetMap. (b) presents the scatter plot of the raw, i.e., unfiltered, data of the network shown in a. This includes all malfunctioning detectors, oversampling of lanes, detectors on residential roads etc. (c) shows the upper-bound of the estimated MFD and the fitted curve based on the log-exp function by Ambühl et al. (2018). Flow and density are per lane. Occupancy is in the interval 0 to 1 and means the fraction of time in the observation interval a detector is covered by vehicles, i.e., it approximates density.

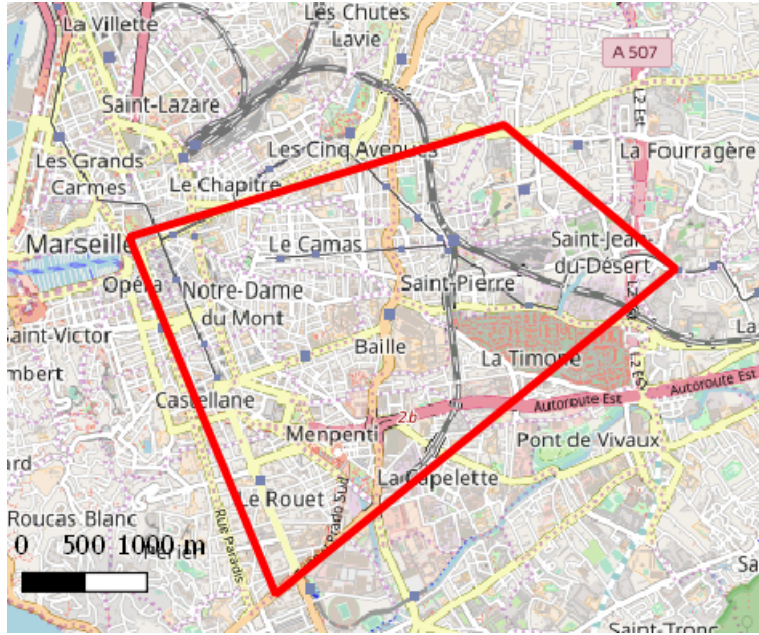

(a) Network exhibit

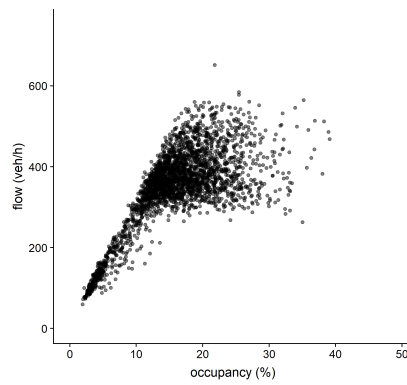

(b) Raw data

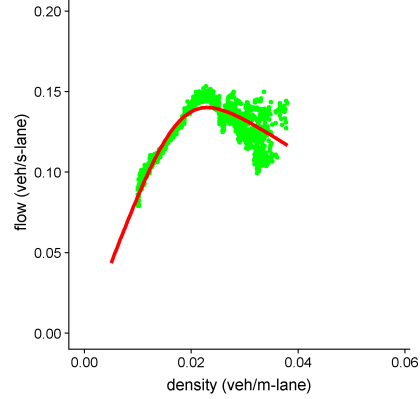

(c) Upper bound and fitted curve

Figure 57: Marseille Region II. (a) shows the network exhibit used for the MFD estimation and calculation of network topology variables. The map is oriented to the north and is obtained from OpenStreetMap. (b) presents the scatter plot of the raw, i.e., unfiltered, data of the network shown in a. This includes all malfunctioning detectors, oversampling of lanes, detectors on residential roads etc. (c) shows the upper-bound of the estimated MFD and the fitted curve based on the log-exp function by Ambühl et al. (2018). Flow and density are per lane. Occupancy is in the interval 0 to 1 and means the fraction of time in the observation interval a detector is covered by vehicles, i.e., it approximates density.

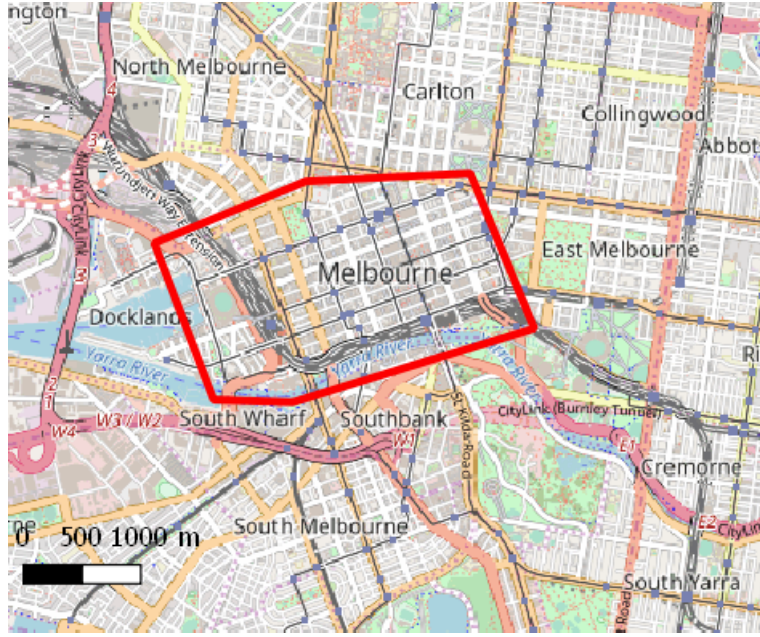

(a) Network exhibit

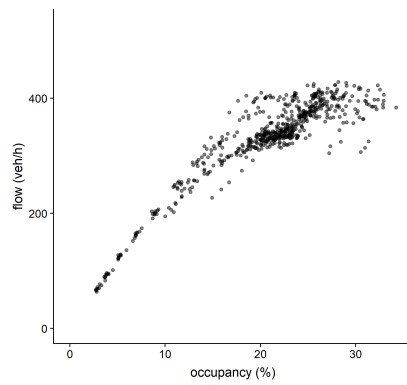

(b) Raw data

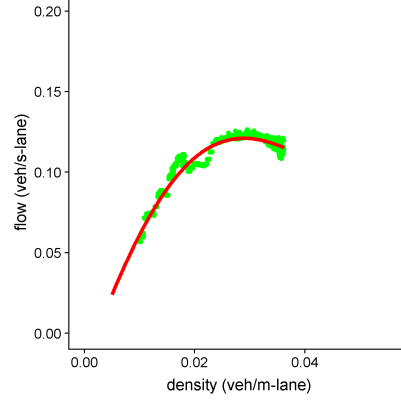

(c) Upper bound and fitted curve

Figure 58: Melbourne Region I. (a) shows the network exhibit used for the MFD estimation and calculation of network topology variables. The map is oriented to the north and is obtained from OpenStreetMap. (b) presents the scatter plot of the raw, i.e., unfiltered, data of the network shown in a. This includes all malfunctioning detectors, oversampling of lanes, detectors on residential roads etc. (c) shows the upper-bound of the estimated MFD and the fitted curve based on the log-exp function by Ambühl et al. (2018). Flow and density are per lane. Occupancy is in the interval 0 to 1 and means the fraction of time in the observation interval a detector is covered by vehicles, i.e., it approximates density.

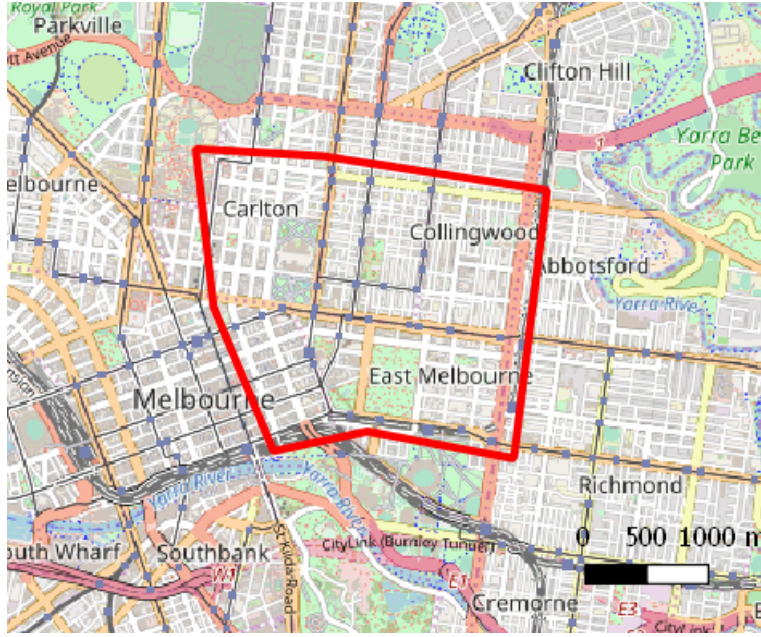

(a) Network exhibit

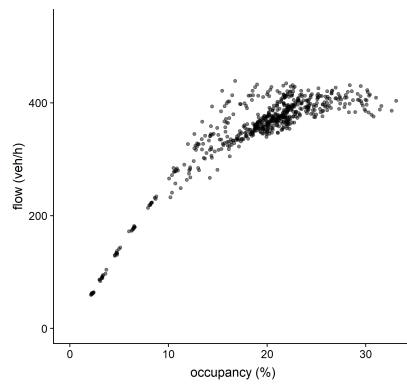

(b) Raw data

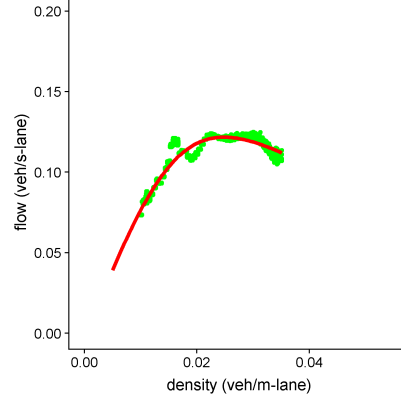

(c) Upper bound and fitted curve

Figure 59: Melbourne Region II. (a) shows the network exhibit used for the MFD estimation and calculation of network topology variables. The map is oriented to the north and is obtained from OpenStreetMap. (b) presents the scatter plot of the raw, i.e., unfiltered, data of the network shown in a. This includes all malfunctioning detectors, oversampling of lanes, detectors on residential roads etc. (c) shows the upper-bound of the estimated MFD and the fitted curve based on the log-exp function by Ambühl et al. (2018). Flow and density are per lane. Occupancy is in the interval 0 to 1 and means the fraction of time in the observation interval a detector is covered by vehicles, i.e., it approximates density.

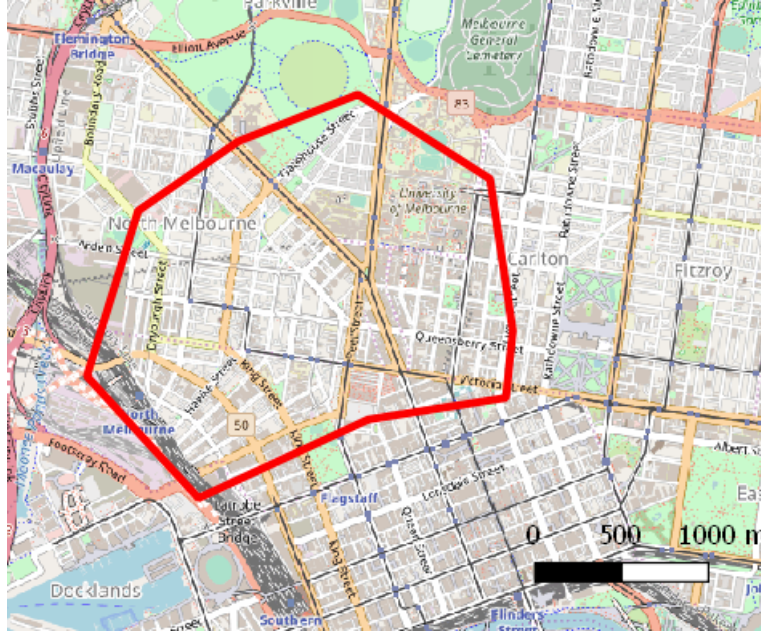

(a) Network exhibit

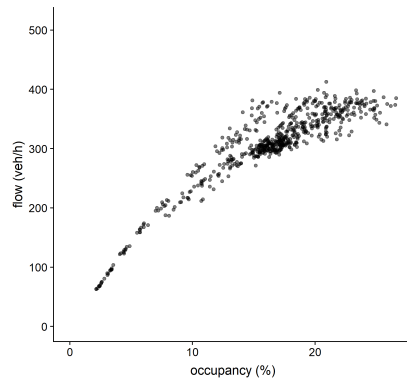

(b) Raw data

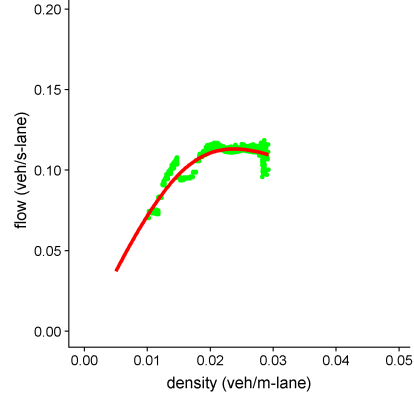

(c) Upper bound and fitted curve

Figure 60: Melbourne Region III. (a) shows the network exhibit used for the MFD estimation and calculation of network topology variables. The map is oriented to the north and is obtained from OpenStreetMap. (b) presents the scatter plot of the raw, i.e., unfiltered, data of the network shown in a. This includes all malfunctioning detectors, oversampling of lanes, detectors on residential roads etc. (c) shows the upper-bound of the estimated MFD and the fitted curve based on the log-exp function by Ambühl et al. (2018). Flow and density are per lane. Occupancy is in the interval 0 to 1 and means the fraction of time in the observation interval a detector is covered by vehicles, i.e., it approximates density.

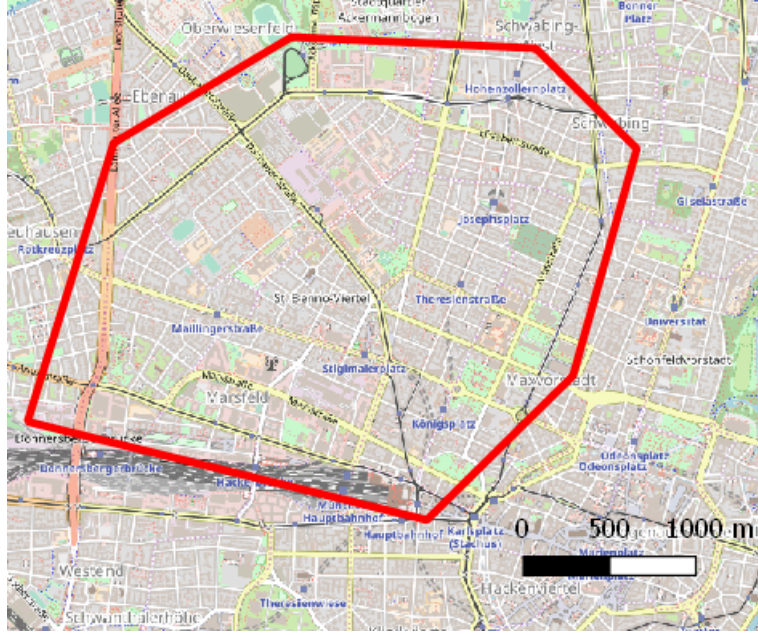

(a) Network exhibit

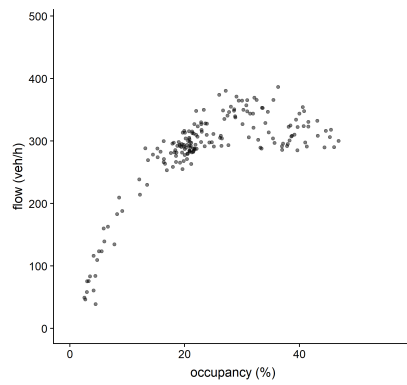

(b) Raw data

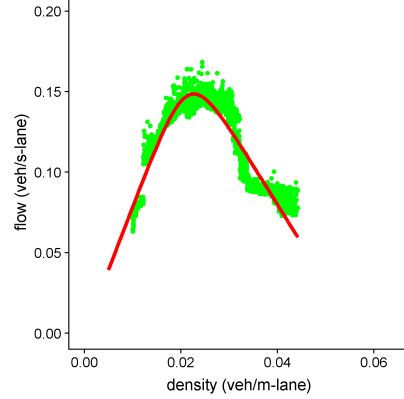

(c) Upper bound and fitted curve

Figure 61: Munich Region I. (a) shows the network exhibit used for the MFD estimation and calculation of network topology variables. The map is oriented to the north and is obtained from OpenStreetMap. (b) presents the scatter plot of the raw, i.e., unfiltered, data of the network shown in a. This includes all malfunctioning detectors, oversampling of lanes, detectors on residential roads etc. (c) shows the upper-bound of the estimated MFD and the fitted curve based on the log-exp function by Ambühl et al. (2018). Flow and density are per lane. Occupancy is in the interval 0 to 1 and means the fraction of time in the observation interval a detector is covered by vehicles, i.e., it approximates density.

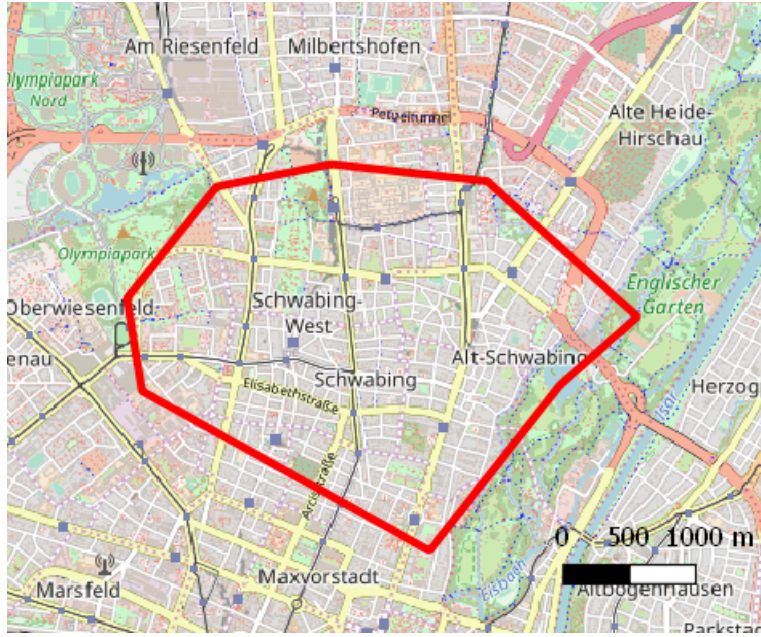

(a) Network exhibit

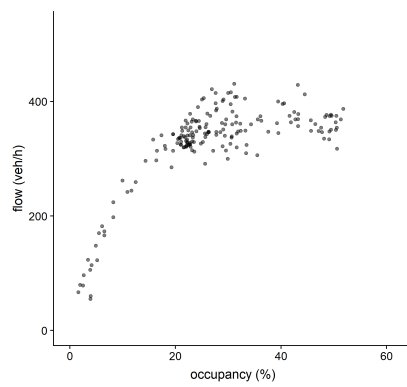

(b) Raw data

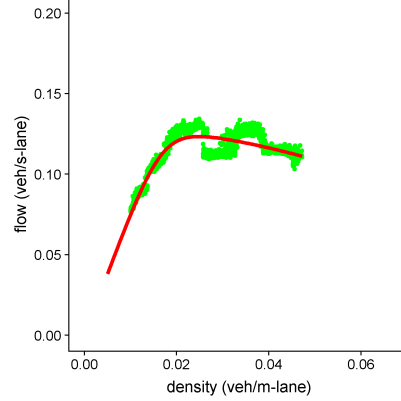

(c) Upper bound and fitted curve

Figure 62: Munich Region II. (a) shows the network exhibit used for the MFD estimation and calculation of network topology variables. The map is oriented to the north and is obtained from OpenStreetMap. (b) presents the scatter plot of the raw, i.e., unfiltered, data of the network shown in a. This includes all malfunctioning detectors, oversampling of lanes, detectors on residential roads etc. (c) shows the upper-bound of the estimated MFD and the fitted curve based on the log-exp function by Ambühl et al. (2018). Flow and density are per lane. Occupancy is in the interval 0 to 1 and means the fraction of time in the observation interval a detector is covered by vehicles, i.e., it approximates density.

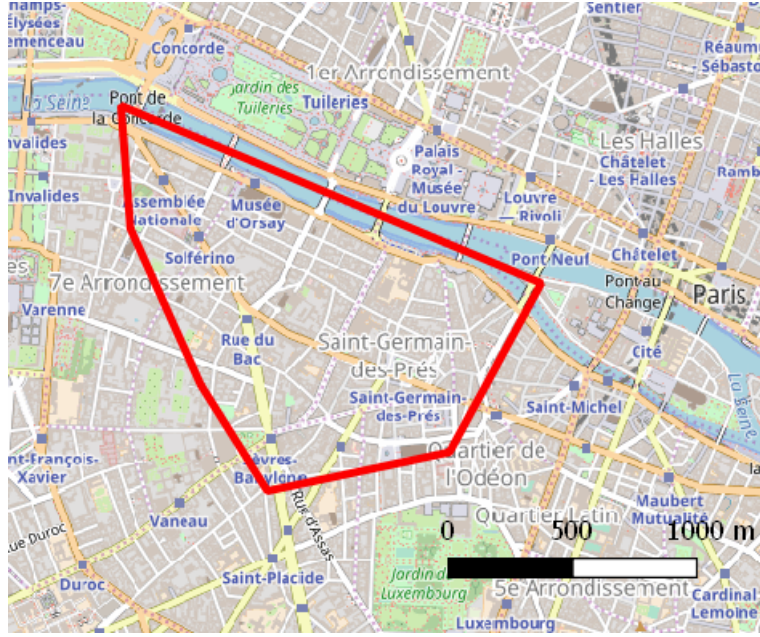

(a) Network exhibit

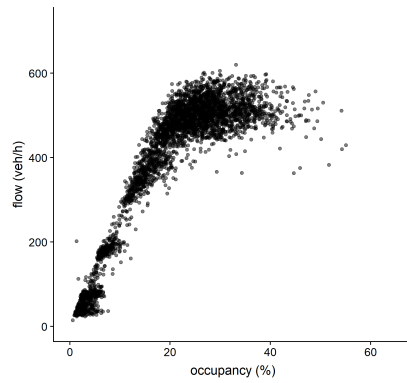

(b) Raw data

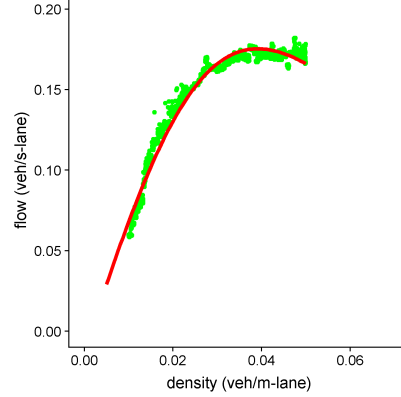

(c) Upper bound and fitted curve

Figure 63: Paris Region I. (a) shows the network exhibit used for the MFD estimation and calculation of network topology variables. The map is oriented to the north and is obtained from OpenStreetMap. (b) presents the scatter plot of the raw, i.e., unfiltered, data of the network shown in a. This includes all malfunctioning detectors, oversampling of lanes, detectors on residential roads etc. (c) shows the upper-bound of the estimated MFD and the fitted curve based on the log-exp function by Ambühl et al. (2018). Flow and density are per lane. Occupancy is in the interval 0 to 1 and means the fraction of time in the observation interval a detector is covered by vehicles, i.e., it approximates density.

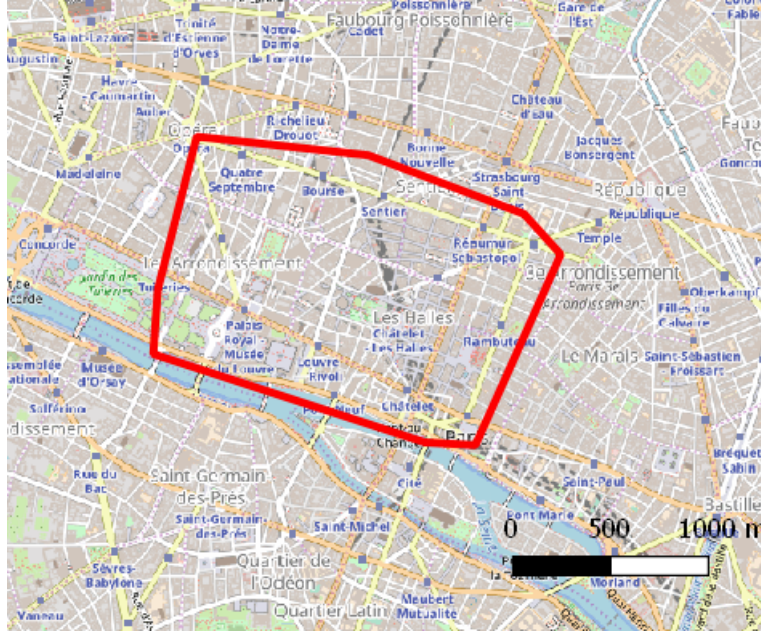

(a) Network exhibit

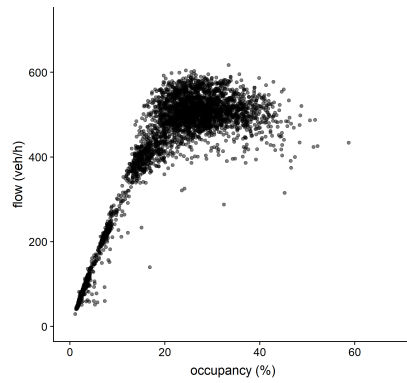

(b) Raw data

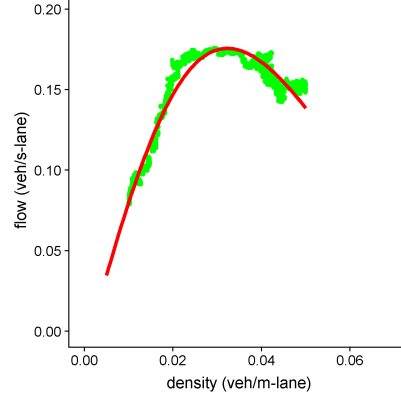

(c) Upper bound and fitted curve

Figure 64: Paris Region II. (a) shows the network exhibit used for the MFD estimation and calculation of network topology variables. The map is oriented to the north and is obtained from OpenStreetMap. (b) presents the scatter plot of the raw, i.e., unfiltered, data of the network shown in a. This includes all malfunctioning detectors, oversampling of lanes, detectors on residential roads etc. (c) shows the upper-bound of the estimated MFD and the fitted curve based on the log-exp function by Ambühl et al. (2018). Flow and density are per lane. Occupancy is in the interval 0 to 1 and means the fraction of time in the observation interval a detector is covered by vehicles, i.e., it approximates density.

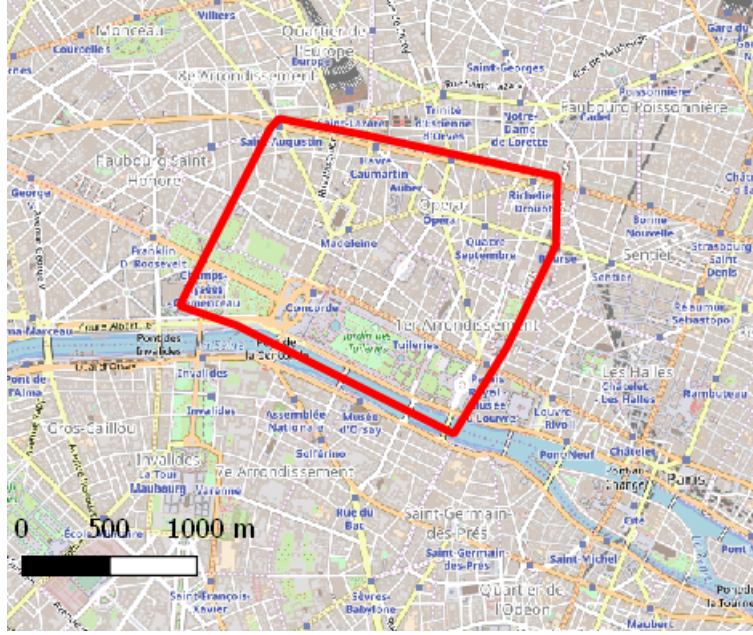

(a) Network exhibit

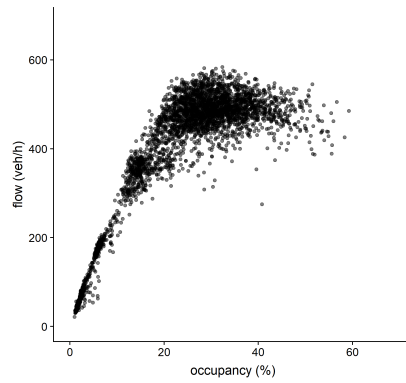

(b) Raw data

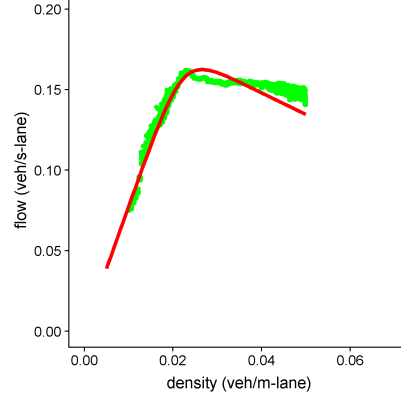

(c) Upper bound and fitted curve

Figure 65: Paris Region III. (a) shows the network exhibit used for the MFD estimation and calculation of network topology variables. The map is oriented to the north and is obtained from OpenStreetMap. (b) presents the scatter plot of the raw, i.e., unfiltered, data of the network shown in a. This includes all malfunctioning detectors, oversampling of lanes, detectors on residential roads etc. (c) shows the upper-bound of the estimated MFD and the fitted curve based on the log-exp function by Ambühl et al. (2018). Flow and density are per lane. Occupancy is in the interval 0 to 1 and means the fraction of time in the observation interval a detector is covered by vehicles, i.e., it approximates density.

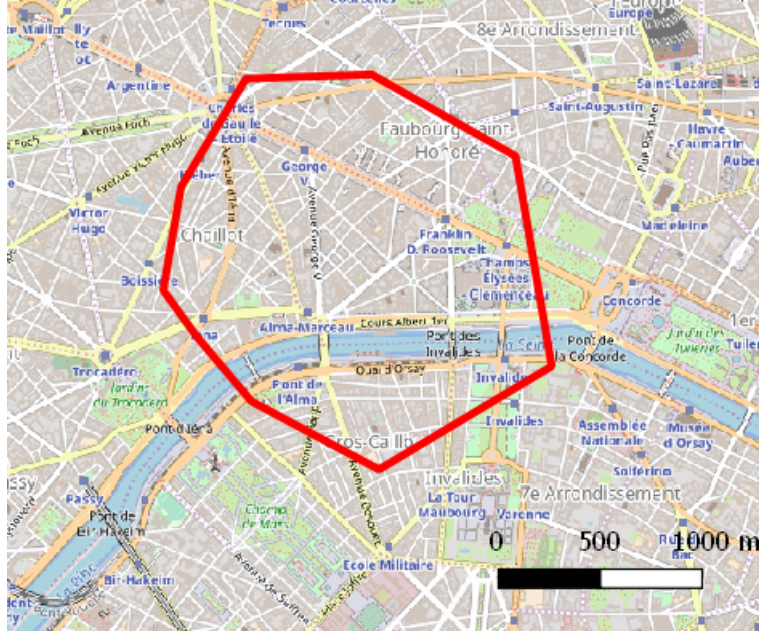

(a) Network exhibit

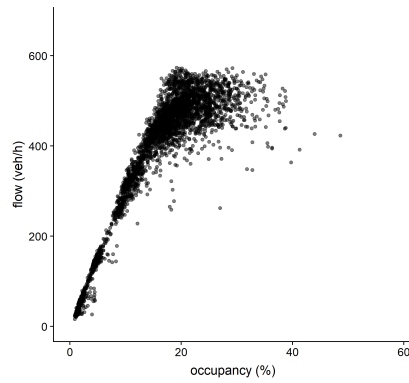

(b) Raw data

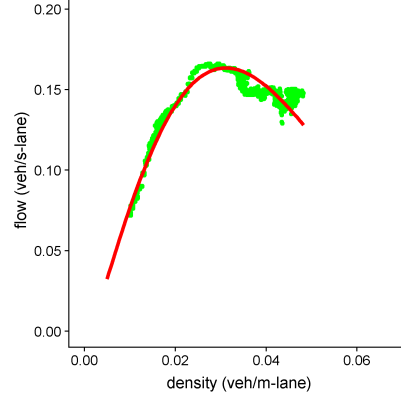

(c) Upper bound and fitted curve

Figure 66: Paris Region IV. (a) shows the network exhibit used for the MFD estimation and calculation of network topology variables. The map is oriented to the north and is obtained from OpenStreetMap. (b) presents the scatter plot of the raw, i.e., unfiltered, data of the network shown in a. This includes all malfunctioning detectors, oversampling of lanes, detectors on residential roads etc. (c) shows the upper-bound of the estimated MFD and the fitted curve based on the log-exp function by Ambühl et al. (2018). Flow and density are per lane. Occupancy is in the interval 0 to 1 and means the fraction of time in the observation interval a detector is covered by vehicles, i.e., it approximates density.

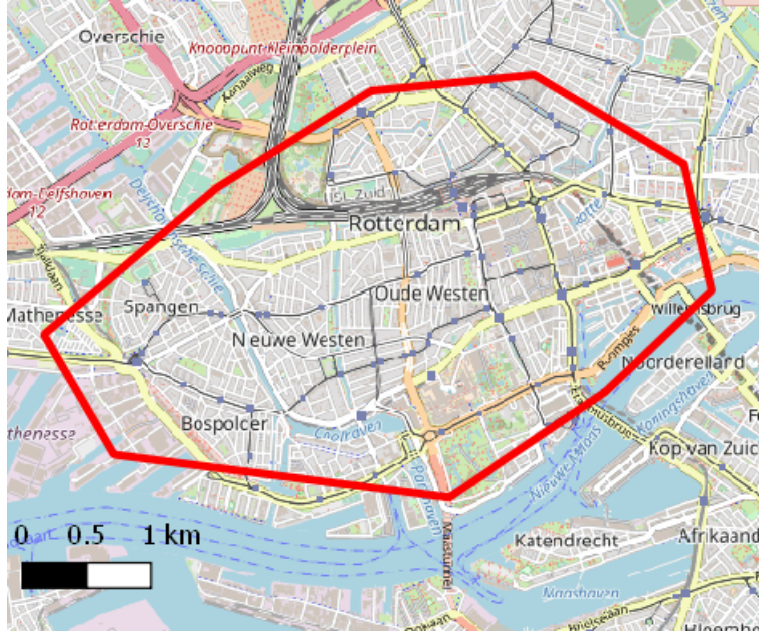

(a) Network exhibit



(b) Raw data

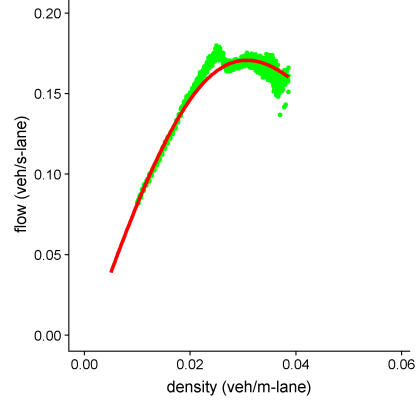

(c) Upper bound and fitted curve

Figure 67: Rotterdam Region I. (a) shows the network exhibit used for the MFD estimation and calculation of network topology variables. The map is oriented to the north and is obtained from OpenStreetMap. (b) presents the scatter plot of the raw, i.e., unfiltered, data of the network shown in a. This includes all malfunctioning detectors, oversampling of lanes, detectors on residential roads etc. (c) shows the upper-bound of the estimated MFD and the fitted curve based on the log-exp function by Ambühl et al. (2018). Flow and density are per lane. Occupancy is in the interval 0 to 1 and means the fraction of time in the observation interval a detector is covered by vehicles, i.e., it approximates density.

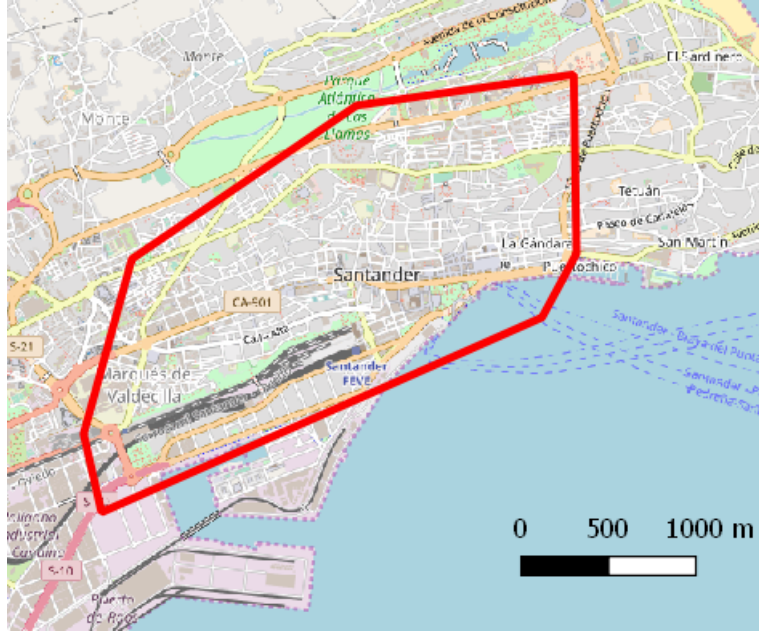

(a) Network exhibit

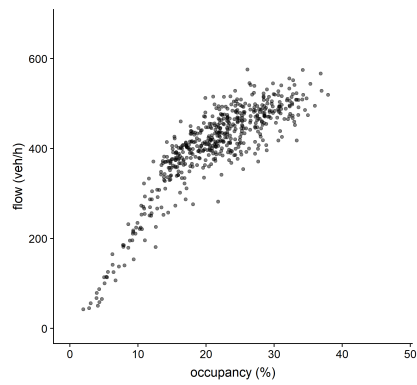

(b) Raw data

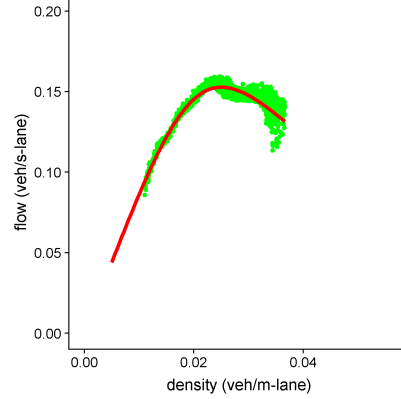

(c) Upper bound and fitted curve

Figure 68: Santander Region I. (a) shows the network exhibit used for the MFD estimation and calculation of network topology variables. The map is oriented to the north and is obtained from OpenStreetMap. (b) presents the scatter plot of the raw, i.e., unfiltered, data of the network shown in a. This includes all malfunctioning detectors, oversampling of lanes, detectors on residential roads etc. (c) shows the upper-bound of the estimated MFD and the fitted curve based on the log-exp function by Ambühl et al. (2018). Flow and density are per lane. Occupancy is in the interval 0 to 1 and means the fraction of time in the observation interval a detector is covered by vehicles, i.e., it approximates density.

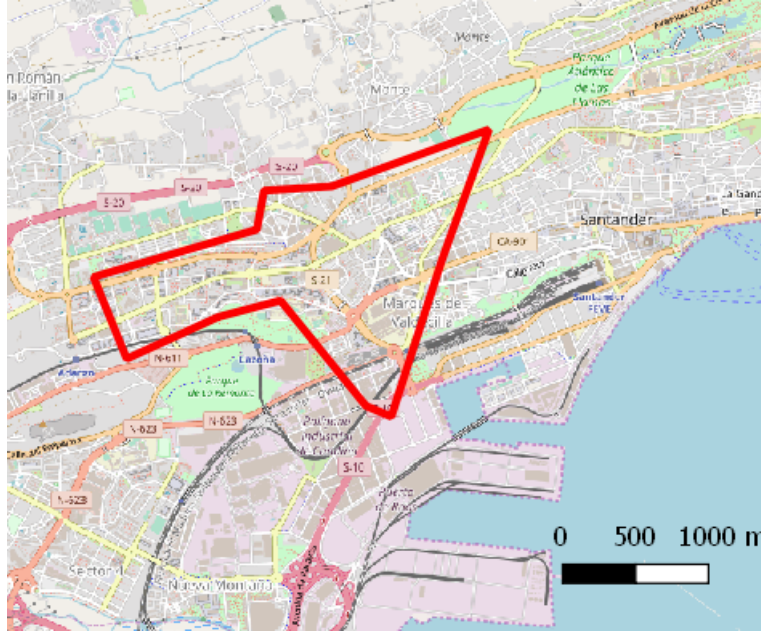

(a) Network exhibit

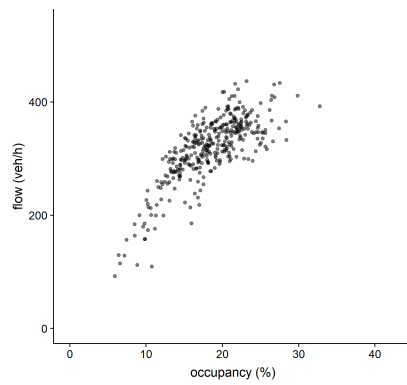

(b) Raw data

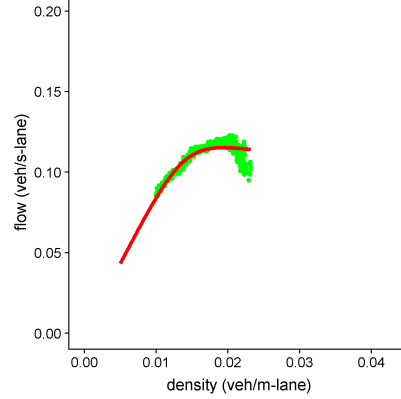

(c) Upper bound and fitted curve

Figure 69: Santander Region II. (a) shows the network exhibit used for the MFD estimation and calculation of network topology variables. The map is oriented to the north and is obtained from OpenStreetMap. (b) presents the scatter plot of the raw, i.e., unfiltered, data of the network shown in a. This includes all malfunctioning detectors, oversampling of lanes, detectors on residential roads etc. (c) shows the upper-bound of the estimated MFD and the fitted curve based on the log-exp function by Ambühl et al. (2018). Flow and density are per lane. Occupancy is in the interval 0 to 1 and means the fraction of time in the observation interval a detector is covered by vehicles, i.e., it approximates density.

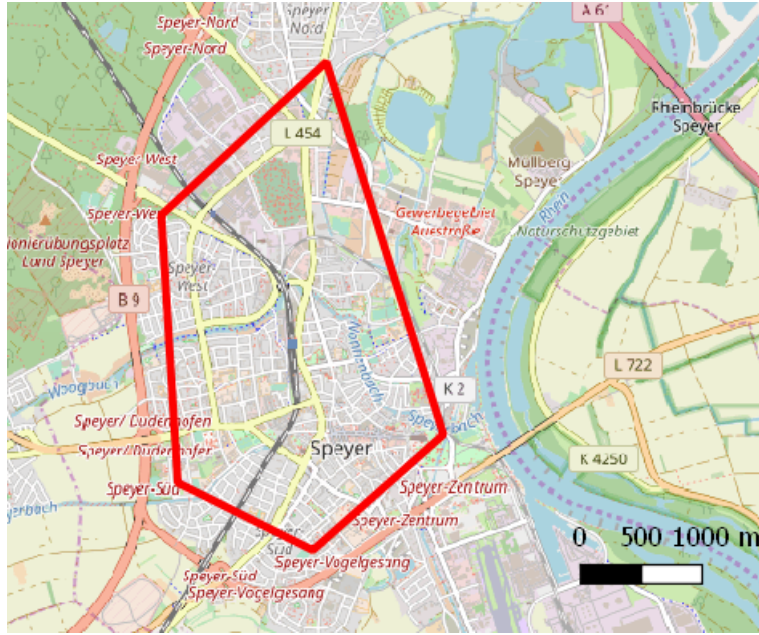

(a) Network exhibit

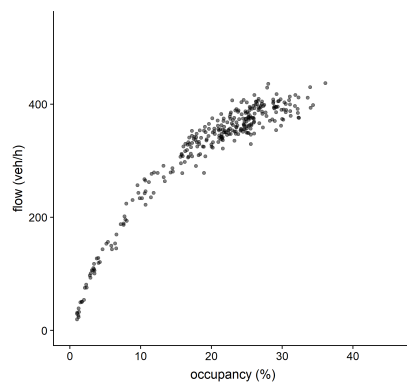

(b) Raw data

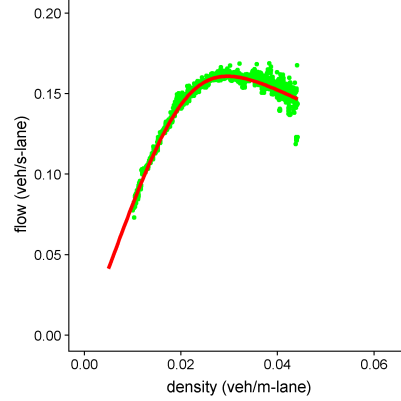

(c) Upper bound and fitted curve

Figure 70: Speyer Region I. (a) shows the network exhibit used for the MFD estimation and calculation of network topology variables. The map is oriented to the north and is obtained from OpenStreetMap. (b) presents the scatter plot of the raw, i.e., unfiltered, data of the network shown in a. This includes all malfunctioning detectors, oversampling of lanes, detectors on residential roads etc. (c) shows the upper-bound of the estimated MFD and the fitted curve based on the log-exp function by Ambühl et al. (2018). Flow and density are per lane. Occupancy is in the interval 0 to 1 and means the fraction of time in the observation interval a detector is covered by vehicles, i.e., it approximates density.

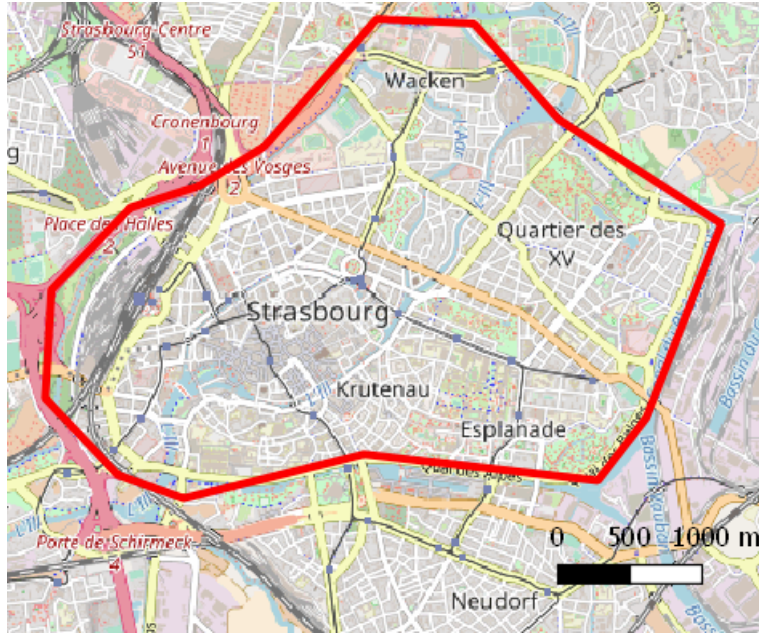

(a) Network exhibit

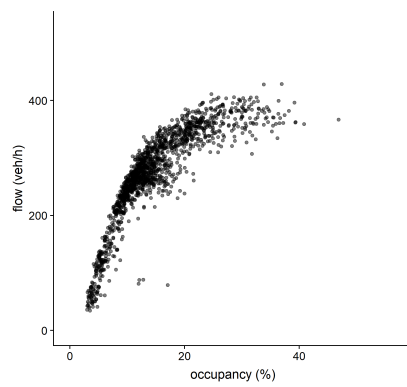

(b) Raw data

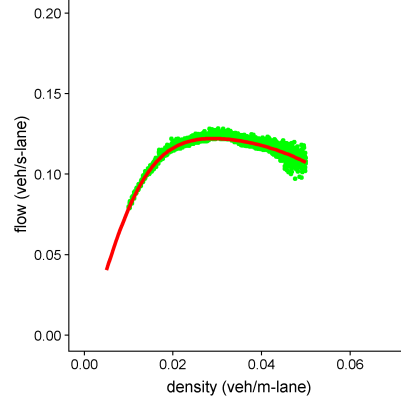

(c) Upper bound and fitted curve

Figure 71: Strasbourg Region I. (a) shows the network exhibit used for the MFD estimation and calculation of network topology variables. The map is oriented to the north and is obtained from OpenStreetMap. (b) presents the scatter plot of the raw, i.e., unfiltered, data of the network shown in a. This includes all malfunctioning detectors, oversampling of lanes, detectors on residential roads etc. (c) shows the upper-bound of the estimated MFD and the fitted curve based on the log-exp function by Ambühl et al. (2018). Flow and density are per lane. Occupancy is in the interval 0 to 1 and means the fraction of time in the observation interval a detector is covered by vehicles, i.e., it approximates density.

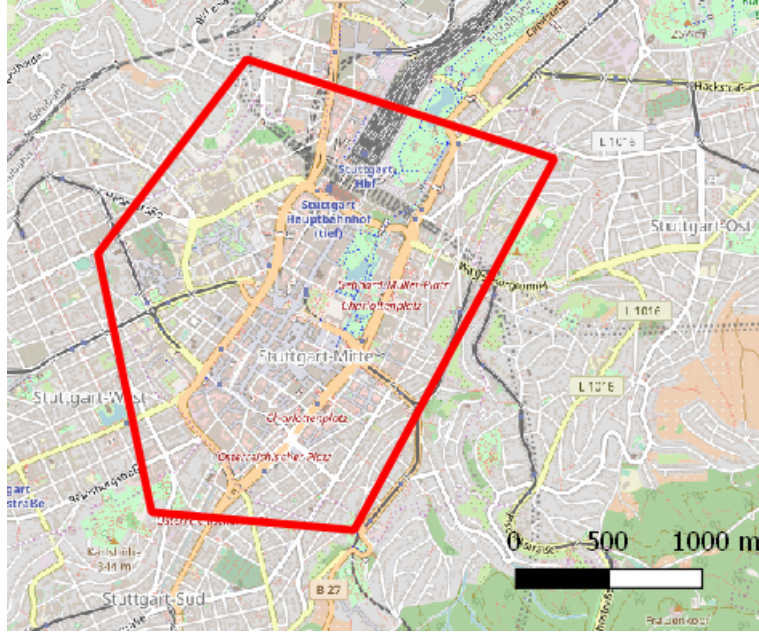

(a) Network exhibit

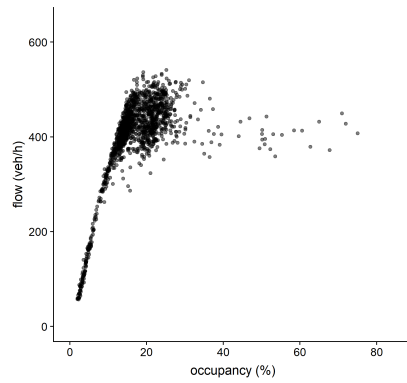

(b) Raw data

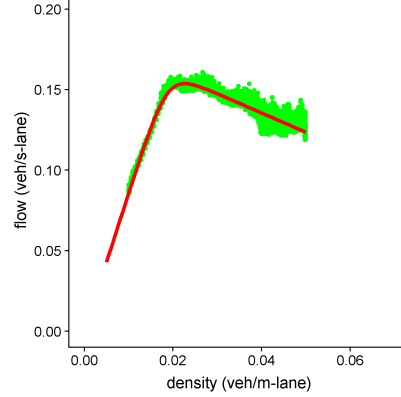

(c) Upper bound and fitted curve

Figure 72: Stuttgart Region I. (a) shows the network exhibit used for the MFD estimation and calculation of network topology variables. The map is oriented to the north and is obtained from OpenStreetMap. (b) presents the scatter plot of the raw, i.e., unfiltered, data of the network shown in a. This includes all malfunctioning detectors, oversampling of lanes, detectors on residential roads etc. (c) shows the upper-bound of the estimated MFD and the fitted curve based on the log-exp function by Ambühl et al. (2018). Flow and density are per lane. Occupancy is in the interval 0 to 1 and means the fraction of time in the observation interval a detector is covered by vehicles, i.e., it approximates density.

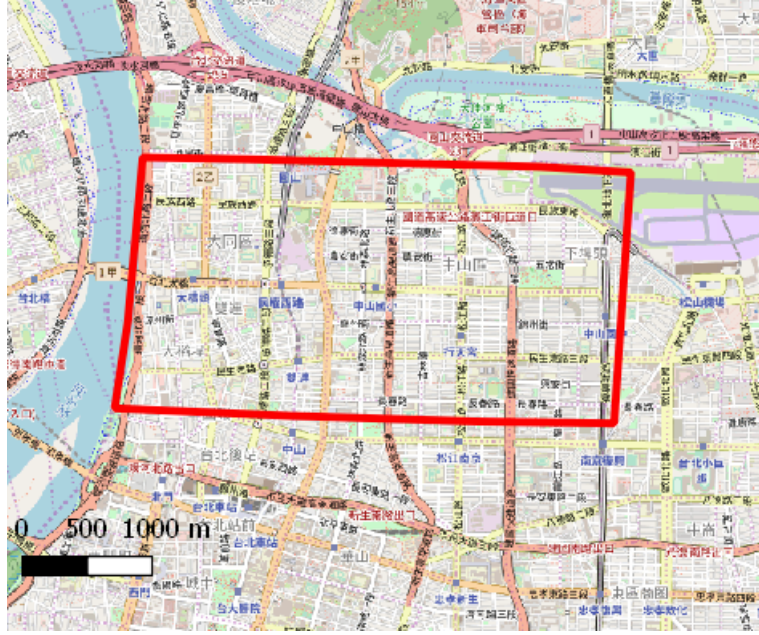

(a) Network exhibit

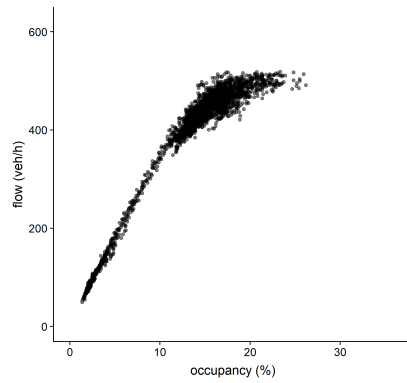

(b) Raw data

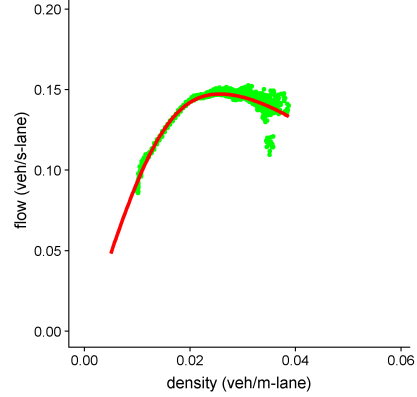

(c) Upper bound and fitted curve

Figure 73: Taipei Region I. (a) shows the network exhibit used for the MFD estimation and calculation of network topology variables. The map is oriented to the north and is obtained from OpenStreetMap. (b) presents the scatter plot of the raw, i.e., unfiltered, data of the network shown in a. This includes all malfunctioning detectors, oversampling of lanes, detectors on residential roads etc. (c) shows the upper-bound of the estimated MFD and the fitted curve based on the log-exp function by Ambühl et al. (2018). Flow and density are per lane. Occupancy is in the interval 0 to 1 and means the fraction of time in the observation interval a detector is covered by vehicles, i.e., it approximates density.

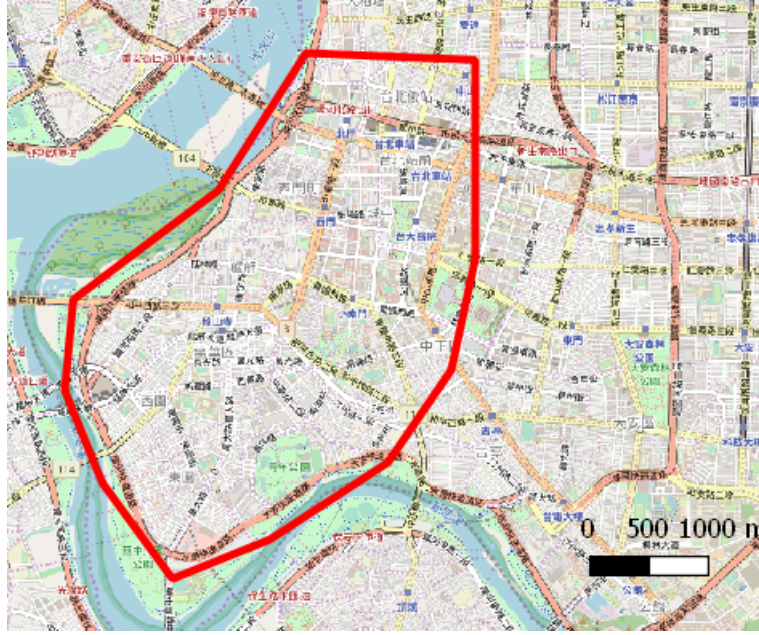

(a) Network exhibit

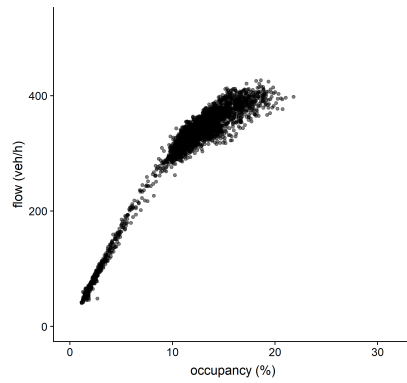

(b) Raw data

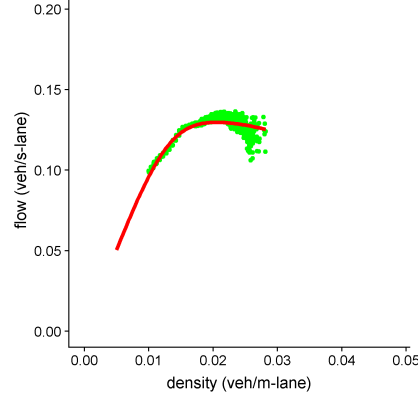

(c) Upper bound and fitted curve

Figure 74: Taipei Region II. (a) shows the network exhibit used for the MFD estimation and calculation of network topology variables. The map is oriented to the north and is obtained from OpenStreetMap. (b) presents the scatter plot of the raw, i.e., unfiltered, data of the network shown in a. This includes all malfunctioning detectors, oversampling of lanes, detectors on residential roads etc. (c) shows the upper-bound of the estimated MFD and the fitted curve based on the log-exp function by Ambühl et al. (2018). Flow and density are per lane. Occupancy is in the interval 0 to 1 and means the fraction of time in the observation interval a detector is covered by vehicles, i.e., it approximates density.

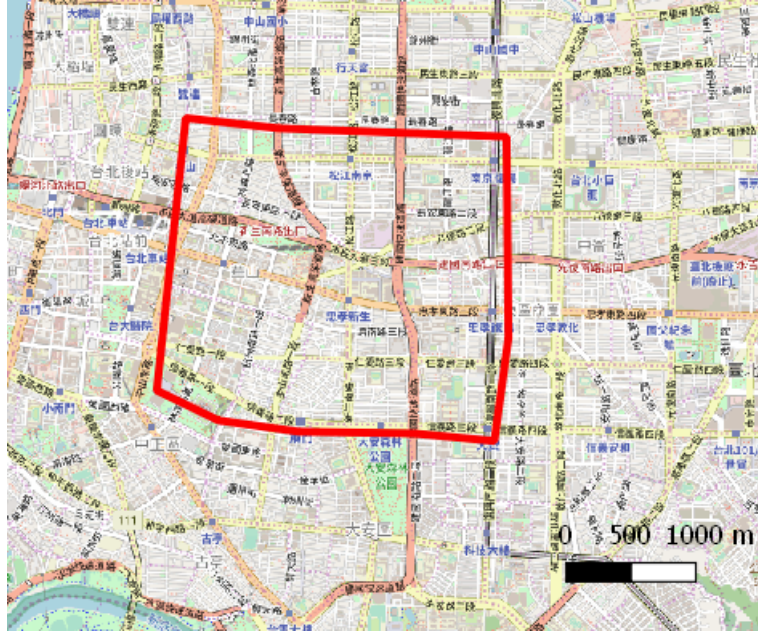

(a) Network exhibit

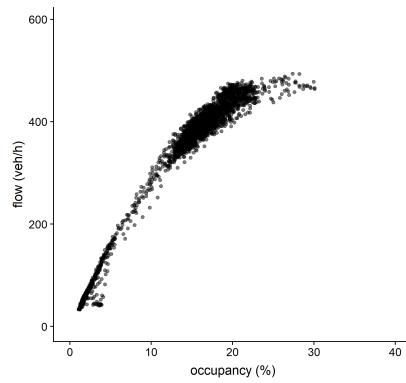

(b) Raw data

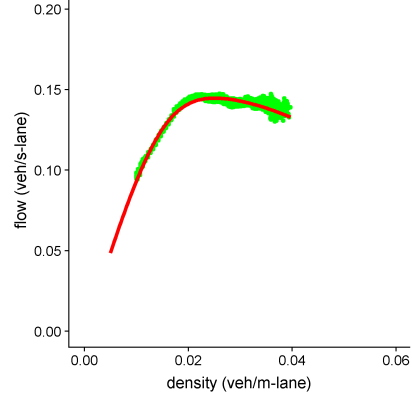

(c) Upper bound and fitted curve

Figure 75: Taipei Region III. (a) shows the network exhibit used for the MFD estimation and calculation of network topology variables. The map is oriented to the north and is obtained from OpenStreetMap. (b) presents the scatter plot of the raw, i.e., unfiltered, data of the network shown in a. This includes all malfunctioning detectors, oversampling of lanes, detectors on residential roads etc. (c) shows the upper-bound of the estimated MFD and the fitted curve based on the log-exp function by Ambühl et al. (2018). Flow and density are per lane. Occupancy is in the interval 0 to 1 and means the fraction of time in the observation interval a detector is covered by vehicles, i.e., it approximates density.

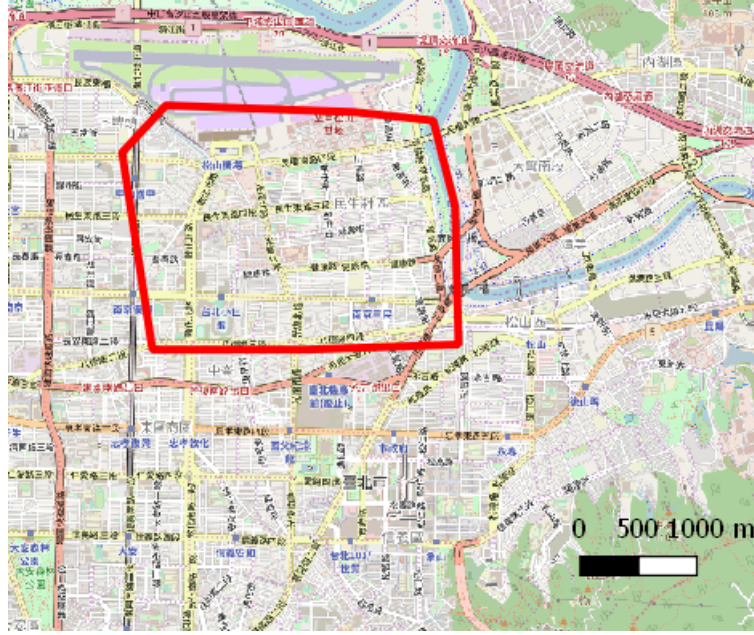

(a) Network exhibit

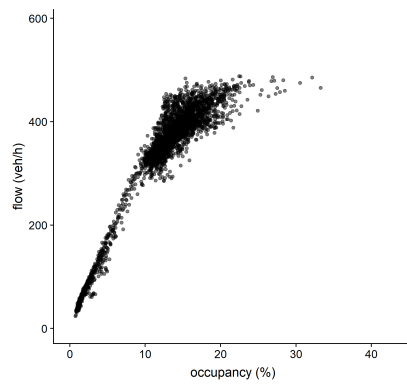

(b) Raw data

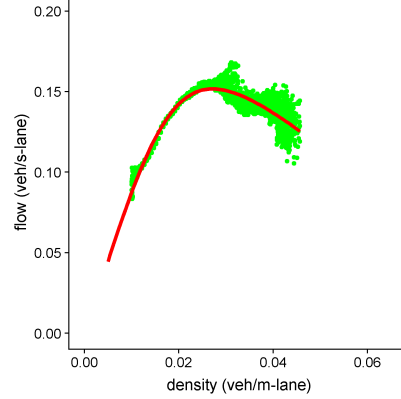

(c) Upper bound and fitted curve

Figure 76: Taipei Region IV. (a) shows the network exhibit used for the MFD estimation and calculation of network topology variables. The map is oriented to the north and is obtained from OpenStreetMap. (b) presents the scatter plot of the raw, i.e., unfiltered, data of the network shown in a. This includes all malfunctioning detectors, oversampling of lanes, detectors on residential roads etc. (c) shows the upper-bound of the estimated MFD and the fitted curve based on the log-exp function by Ambühl et al. (2018). Flow and density are per lane. Occupancy is in the interval 0 to 1 and means the fraction of time in the observation interval a detector is covered by vehicles, i.e., it approximates density.

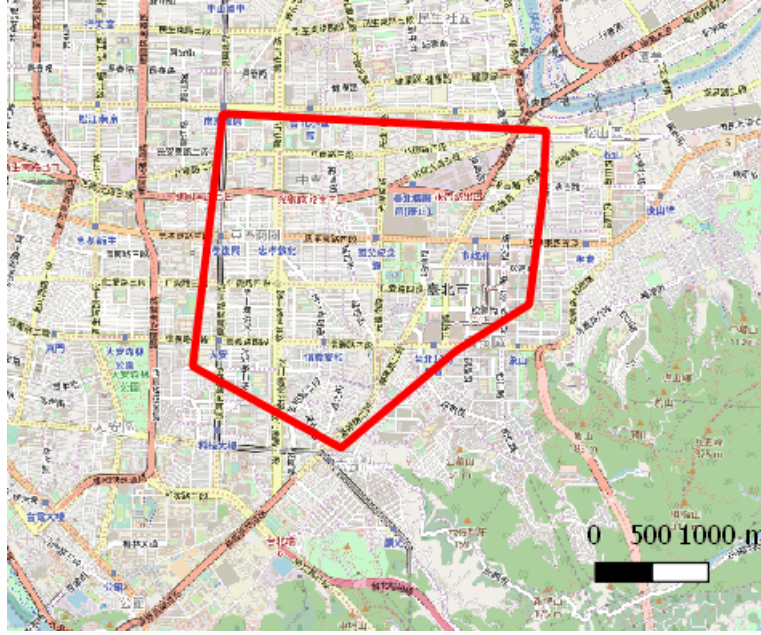

(a) Network exhibit

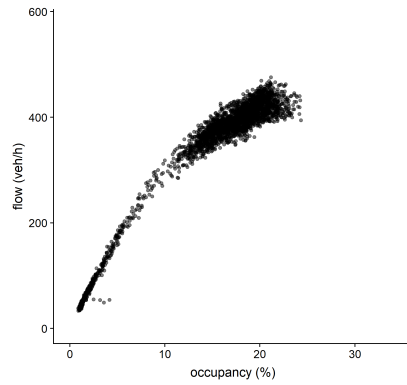

(b) Raw data

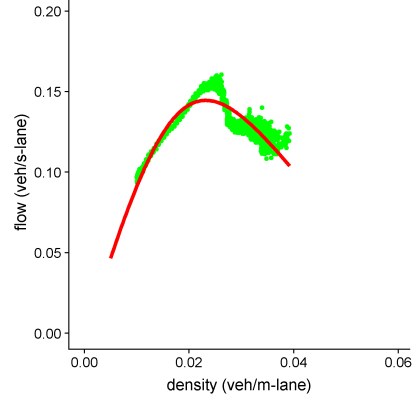

(c) Upper bound and fitted curve

Figure 77: Taipei Region V. (a) shows the network exhibit used for the MFD estimation and calculation of network topology variables. The map is oriented to the north and is obtained from OpenStreetMap. (b) presents the scatter plot of the raw, i.e., unfiltered, data of the network shown in a. This includes all malfunctioning detectors, oversampling of lanes, detectors on residential roads etc. (c) shows the upper-bound of the estimated MFD and the fitted curve based on the log-exp function by Ambühl et al. (2018). Flow and density are per lane. Occupancy is in the interval 0 to 1 and means the fraction of time in the observation interval a detector is covered by vehicles, i.e., it approximates density.

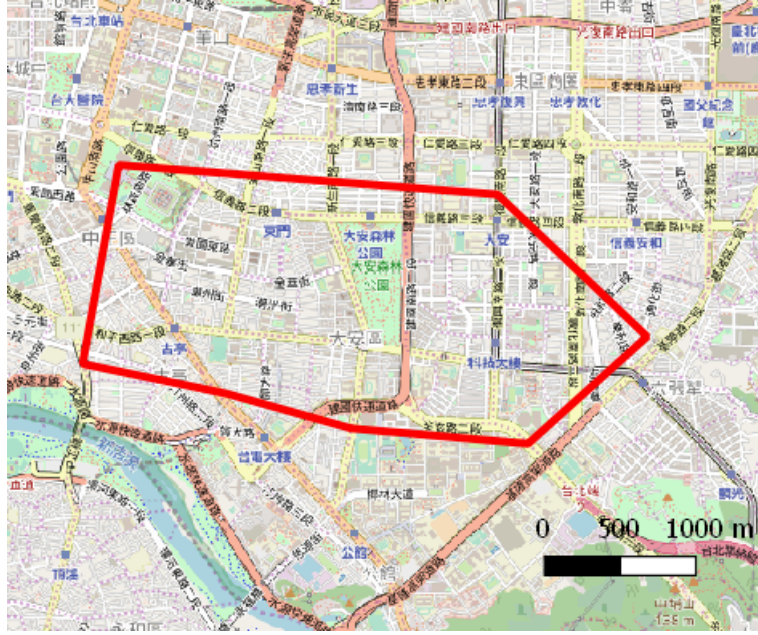

(a) Network exhibit

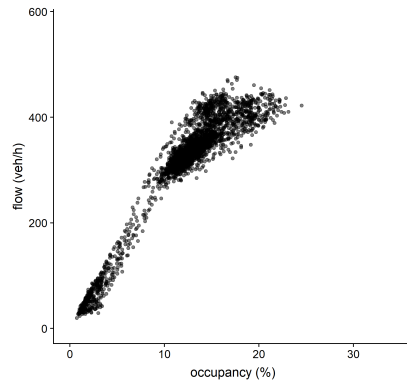

(b) Raw data

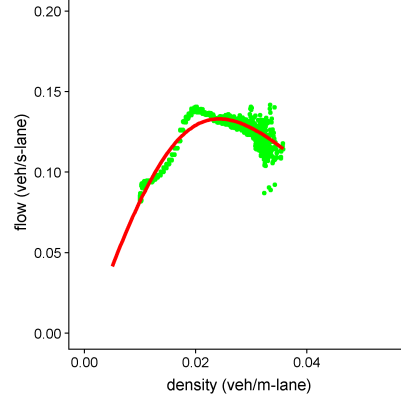

(c) Upper bound and fitted curve

Figure 78: Taipei Region VI. (a) shows the network exhibit used for the MFD estimation and calculation of network topology variables. The map is oriented to the north and is obtained from OpenStreetMap. (b) presents the scatter plot of the raw, i.e., unfiltered, data of the network shown in a. This includes all malfunctioning detectors, oversampling of lanes, detectors on residential roads etc. (c) shows the upper-bound of the estimated MFD and the fitted curve based on the log-exp function by Ambühl et al. (2018). Flow and density are per lane. Occupancy is in the interval 0 to 1 and means the fraction of time in the observation interval a detector is covered by vehicles, i.e., it approximates density.

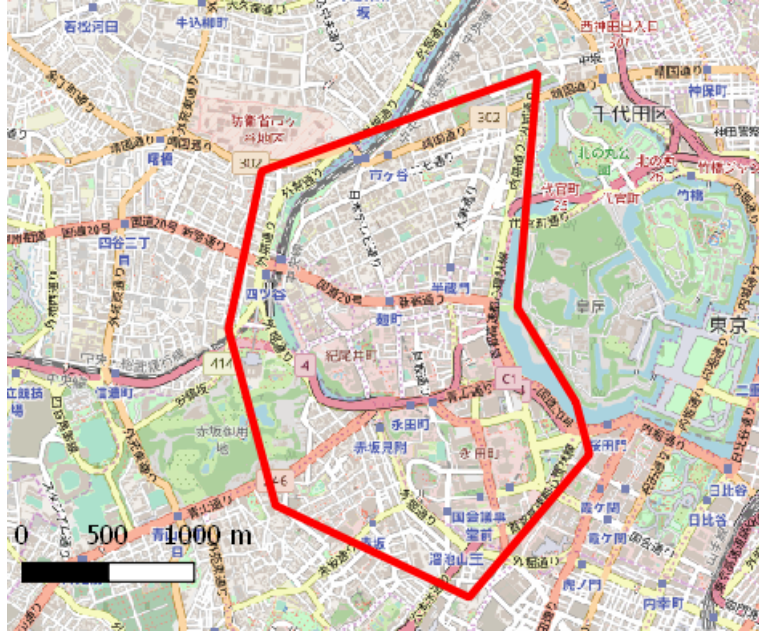

(a) Network exhibit

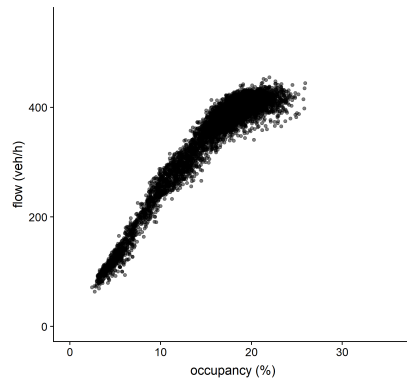

(b) Raw data

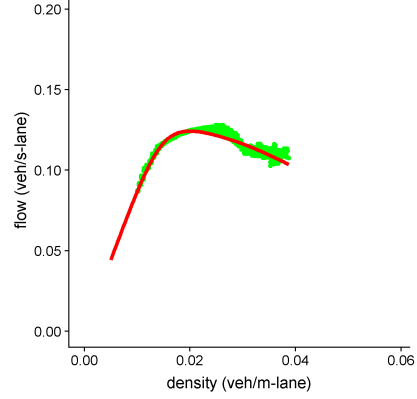

(c) Upper bound and fitted curve

Figure 79: Tokyo Region I. (a) shows the network exhibit used for the MFD estimation and calculation of network topology variables. The map is oriented to the north and is obtained from OpenStreetMap. (b) presents the scatter plot of the raw, i.e., unfiltered, data of the network shown in a. This includes all malfunctioning detectors, oversampling of lanes, detectors on residential roads etc. (c) shows the upper-bound of the estimated MFD and the fitted curve based on the log-exp function by Ambühl et al. (2018). Flow and density are per lane. Occupancy is in the interval 0 to 1 and means the fraction of time in the observation interval a detector is covered by vehicles, i.e., it approximates density.

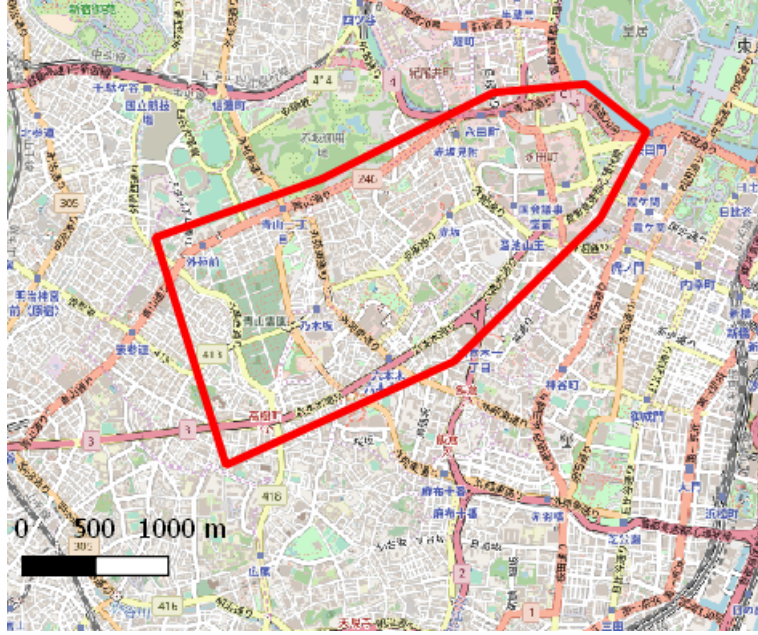

(a) Network exhibit

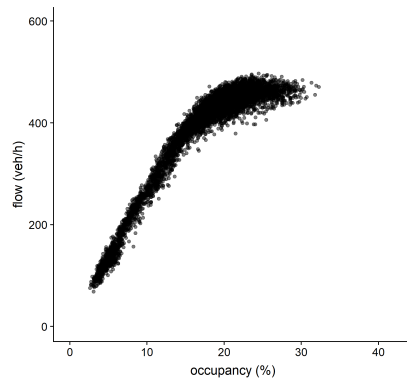

(b) Raw data

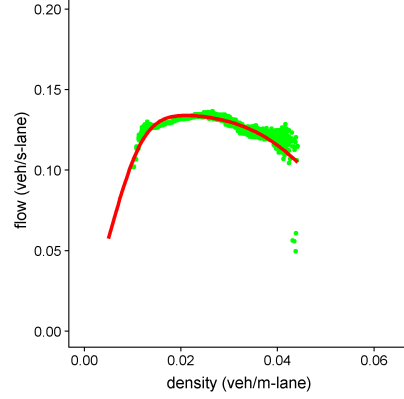

(c) Upper bound and fitted curve

Figure 80: Tokyo Region II. (a) shows the network exhibit used for the MFD estimation and calculation of network topology variables. The map is oriented to the north and is obtained from OpenStreetMap. (b) presents the scatter plot of the raw, i.e., unfiltered, data of the network shown in a. This includes all malfunctioning detectors, oversampling of lanes, detectors on residential roads etc. (c) shows the upper-bound of the estimated MFD and the fitted curve based on the log-exp function by Ambühl et al. (2018). Flow and density are per lane. Occupancy is in the interval 0 to 1 and means the fraction of time in the observation interval a detector is covered by vehicles, i.e., it approximates density.

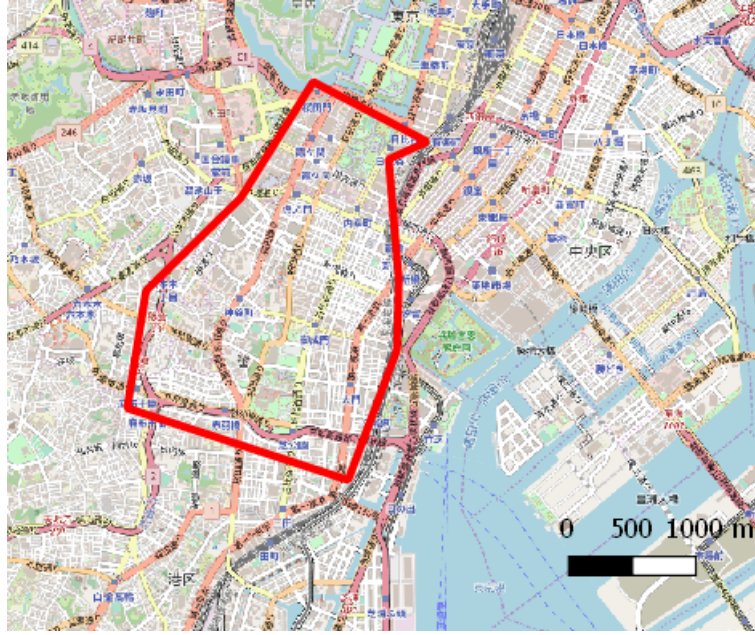

(a) Network exhibit

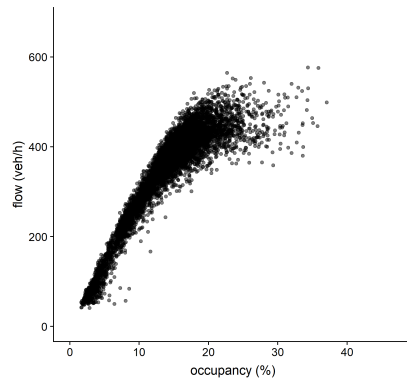

(b) Raw data

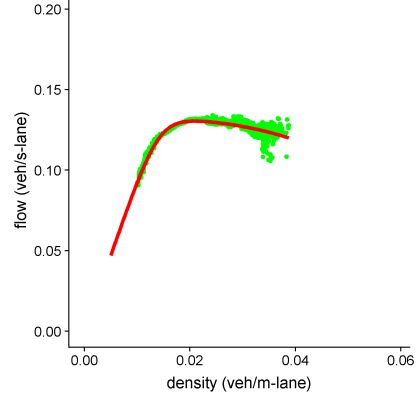

(c) Upper bound and fitted curve

Figure 81: Tokyo Region III. (a) shows the network exhibit used for the MFD estimation and calculation of network topology variables. The map is oriented to the north and is obtained from OpenStreetMap. (b) presents the scatter plot of the raw, i.e., unfiltered, data of the network shown in a. This includes all malfunctioning detectors, oversampling of lanes, detectors on residential roads etc. (c) shows the upper-bound of the estimated MFD and the fitted curve based on the log-exp function by Ambühl et al. (2018). Flow and density are per lane. Occupancy is in the interval 0 to 1 and means the fraction of time in the observation interval a detector is covered by vehicles, i.e., it approximates density.

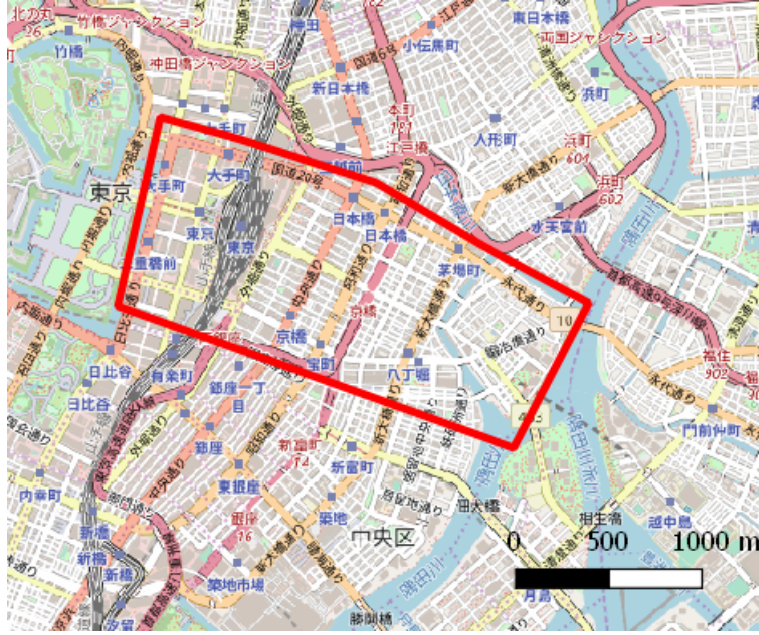

(a) Network exhibit

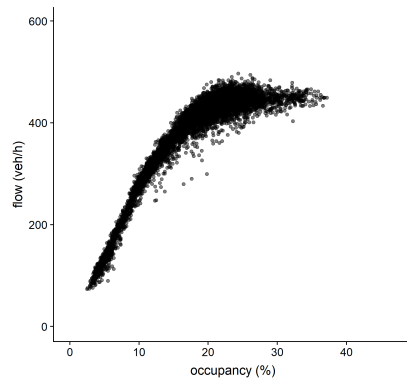

(b) Raw data

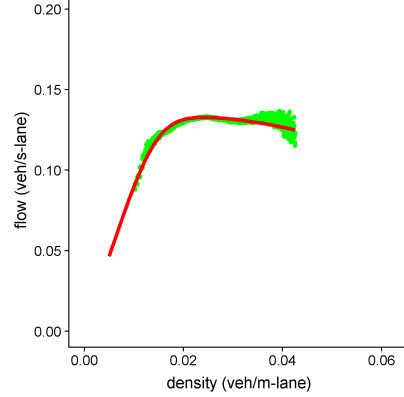

(c) Upper bound and fitted curve

Figure 82: Tokyo Region IV. (a) shows the network exhibit used for the MFD estimation and calculation of network topology variables. The map is oriented to the north and is obtained from OpenStreetMap. (b) presents the scatter plot of the raw, i.e., unfiltered, data of the network shown in a. This includes all malfunctioning detectors, oversampling of lanes, detectors on residential roads etc. (c) shows the upper-bound of the estimated MFD and the fitted curve based on the log-exp function by Ambühl et al. (2018). Flow and density are per lane. Occupancy is in the interval 0 to 1 and means the fraction of time in the observation interval a detector is covered by vehicles, i.e., it approximates density.

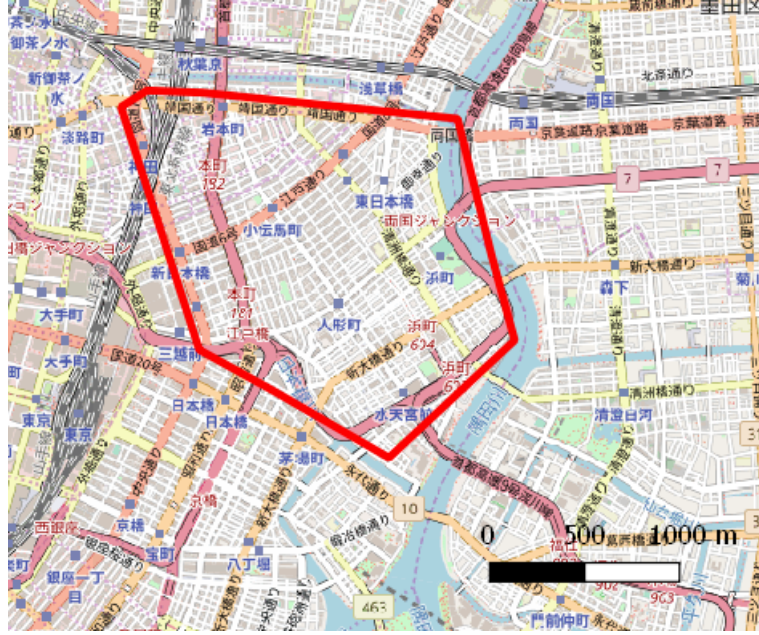

(a) Network exhibit

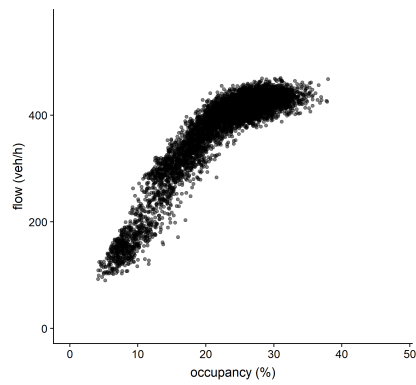

(b) Raw data

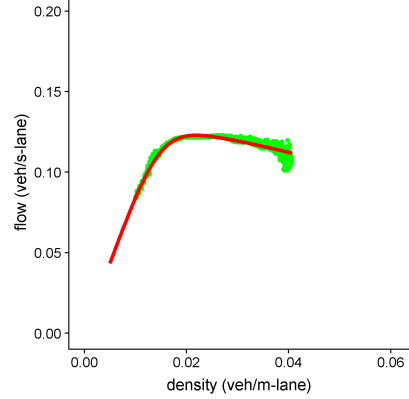

(c) Upper bound and fitted curve

Figure 83: Tokyo Region V. (a) shows the network exhibit used for the MFD estimation and calculation of network topology variables. The map is oriented to the north and is obtained from OpenStreetMap. (b) presents the scatter plot of the raw, i.e., unfiltered, data of the network shown in a. This includes all malfunctioning detectors, oversampling of lanes, detectors on residential roads etc. (c) shows the upper-bound of the estimated MFD and the fitted curve based on the log-exp function by Ambühl et al. (2018). Flow and density are per lane. Occupancy is in the interval 0 to 1 and means the fraction of time in the observation interval a detector is covered by vehicles, i.e., it approximates density.

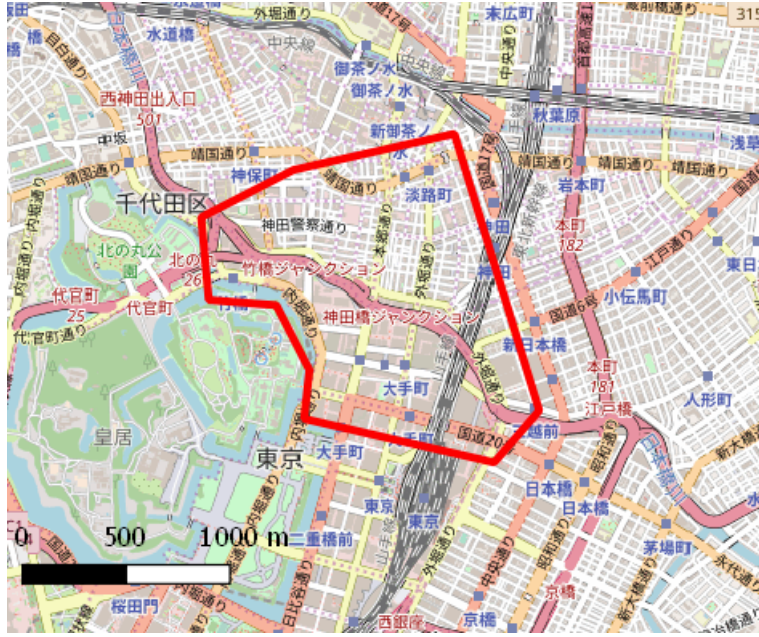

(a) Network exhibit

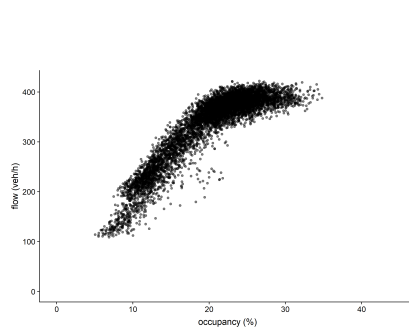

(b) Raw data

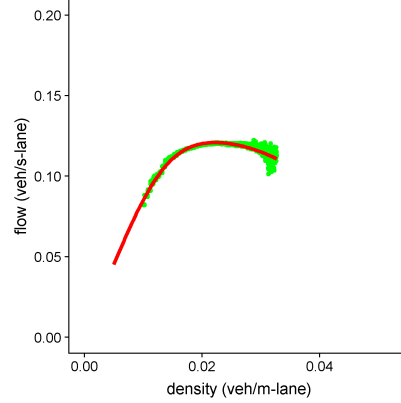

(c) Upper bound and fitted curve

Figure 84: Tokyo Region VI. (a) shows the network exhibit used for the MFD estimation and calculation of network topology variables. The map is oriented to the north and is obtained from OpenStreetMap. (b) presents the scatter plot of the raw, i.e., unfiltered, data of the network shown in a. This includes all malfunctioning detectors, oversampling of lanes, detectors on residential roads etc. (c) shows the upper-bound of the estimated MFD and the fitted curve based on the log-exp function by Ambühl et al. (2018). Flow and density are per lane. Occupancy is in the interval 0 to 1 and means the fraction of time in the observation interval a detector is covered by vehicles, i.e., it approximates density.

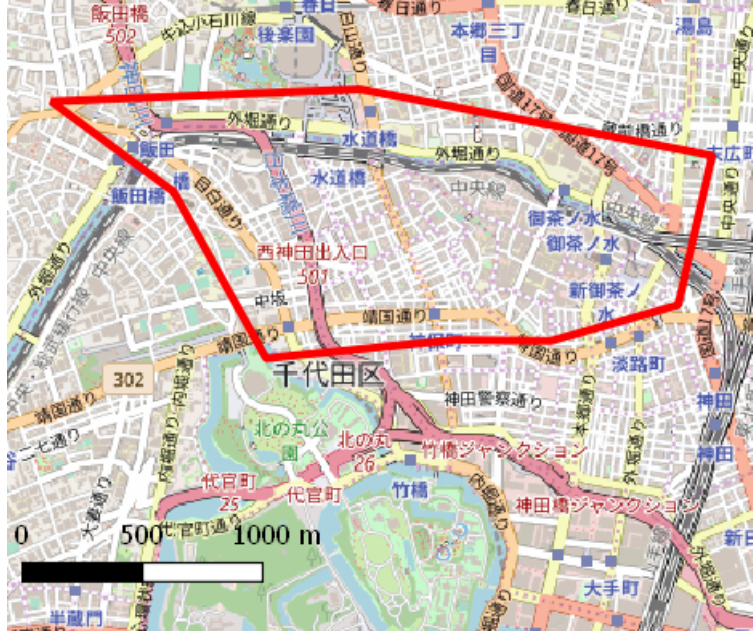

(a) Network exhibit

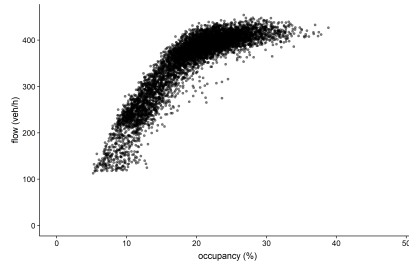

(b) Raw data

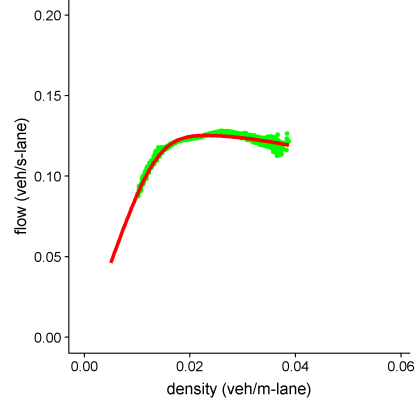

(c) Upper bound and fitted curve

Figure 85: Tokyo Region VII. (a) shows the network exhibit used for the MFD estimation and calculation of network topology variables. The map is oriented to the north and is obtained from OpenStreetMap. (b) presents the scatter plot of the raw, i.e., unfiltered, data of the network shown in a. This includes all malfunctioning detectors, oversampling of lanes, detectors on residential roads etc. (c) shows the upper-bound of the estimated MFD and the fitted curve based on the log-exp function by Ambühl et al. (2018). Flow and density are per lane. Occupancy is in the interval 0 to 1 and means the fraction of time in the observation interval a detector is covered by vehicles, i.e., it approximates density.

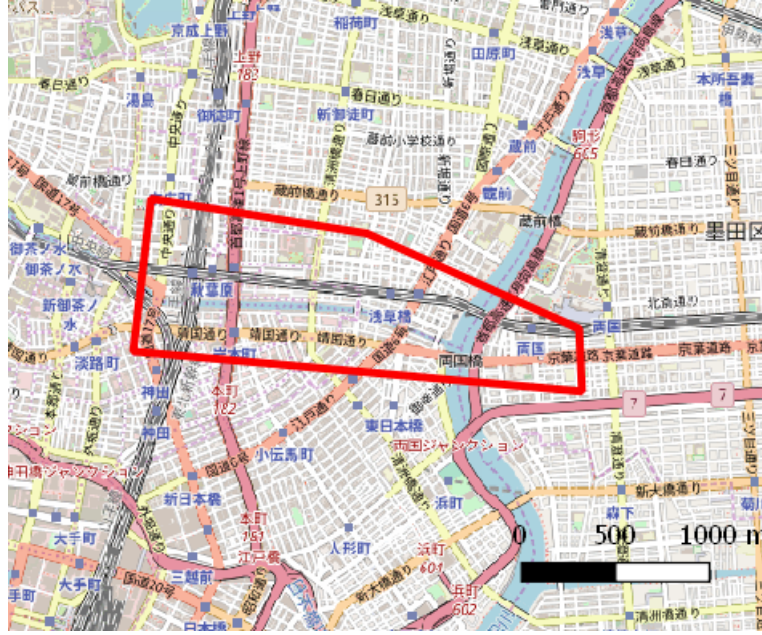

(a) Network exhibit

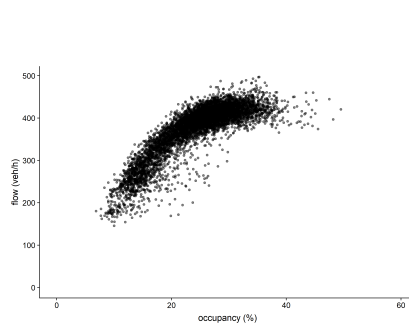

(b) Raw data

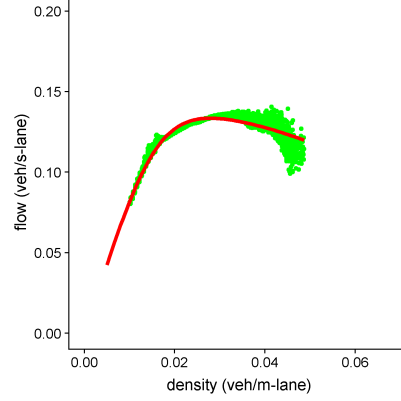

(c) Upper bound and fitted curve

Figure 86: Tokyo Region VIII. (a) shows the network exhibit used for the MFD estimation and calculation of network topology variables. The map is oriented to the north and is obtained from OpenStreetMap. (b) presents the scatter plot of the raw, i.e., unfiltered, data of the network shown in a. This includes all malfunctioning detectors, oversampling of lanes, detectors on residential roads etc. (c) shows the upper-bound of the estimated MFD and the fitted curve based on the log-exp function by Ambühl et al. (2018). Flow and density are per lane. Occupancy is in the interval 0 to 1 and means the fraction of time in the observation interval a detector is covered by vehicles, i.e., it approximates density.

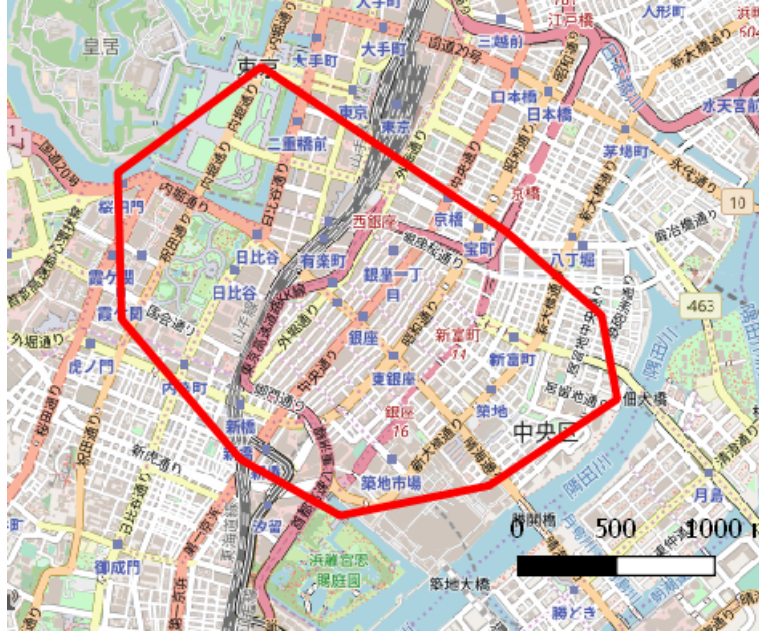

(a) Network exhibit

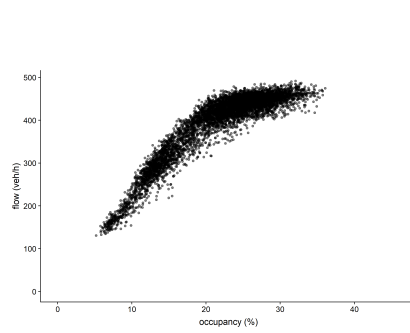

(b) Raw data

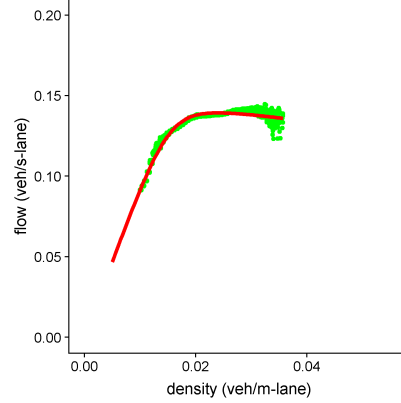

(c) Upper bound and fitted curve

Figure 87: Tokyo Region IX. (a) shows the network exhibit used for the MFD estimation and calculation of network topology variables. The map is oriented to the north and is obtained from OpenStreetMap. (b) presents the scatter plot of the raw, i.e., unfiltered, data of the network shown in a. This includes all malfunctioning detectors, oversampling of lanes, detectors on residential roads etc. (c) shows the upper-bound of the estimated MFD and the fitted curve based on the log-exp function by Ambühl et al. (2018). Flow and density are per lane. Occupancy is in the interval 0 to 1 and means the fraction of time in the observation interval a detector is covered by vehicles, i.e., it approximates density.

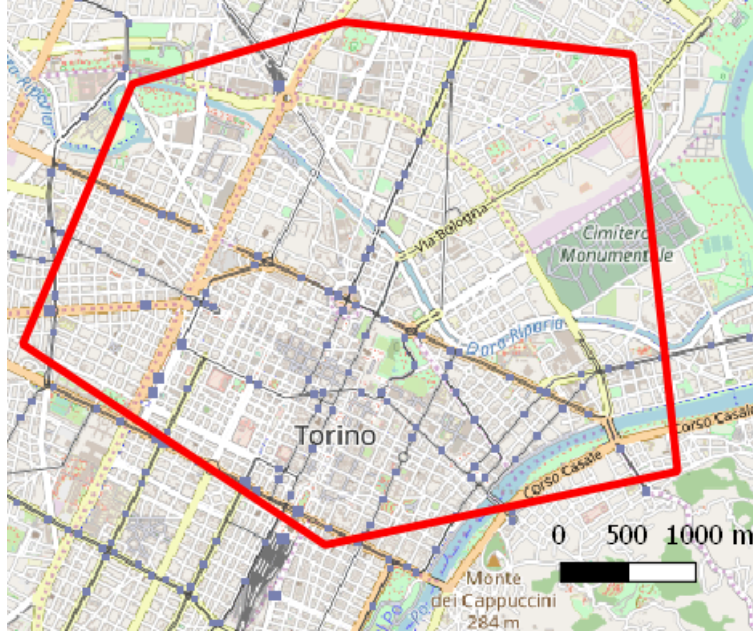

(a) Network exhibit

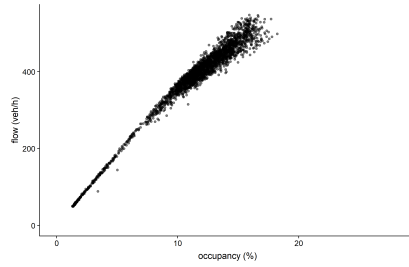

(b) Raw data

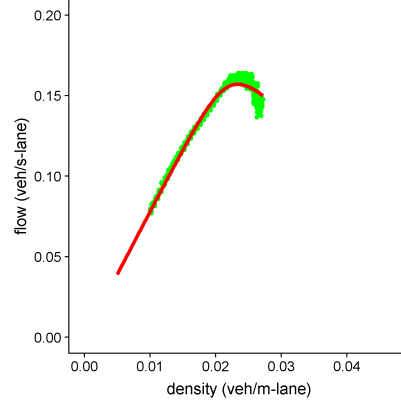

(c) Upper bound and fitted curve

Figure 88: Torino Region I. (a) shows the network exhibit used for the MFD estimation and calculation of network topology variables. The map is oriented to the north and is obtained from OpenStreetMap. (b) presents the scatter plot of the raw, i.e., unfiltered, data of the network shown in a. This includes all malfunctioning detectors, oversampling of lanes, detectors on residential roads etc. (c) shows the upper-bound of the estimated MFD and the fitted curve based on the log-exp function by Ambühl et al. (2018). Flow and density are per lane. Occupancy is in the interval 0 to 1 and means the fraction of time in the observation interval a detector is covered by vehicles, i.e., it approximates density.

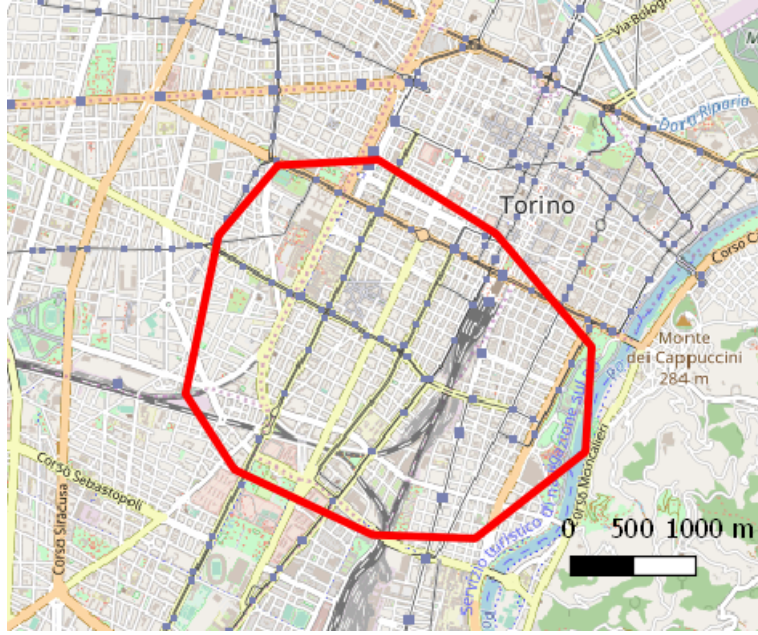

(a) Network exhibit

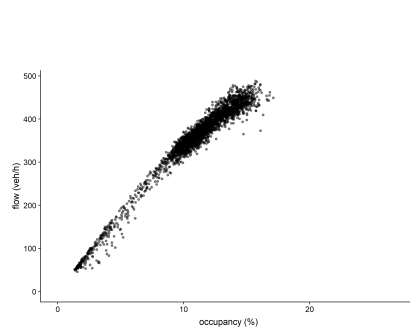

(b) Raw data

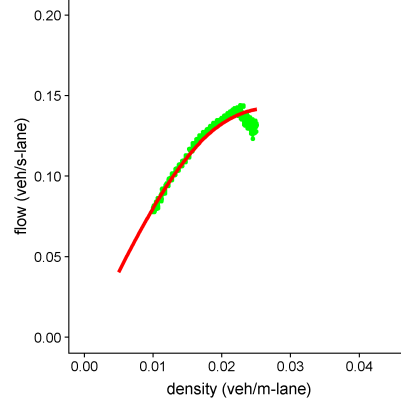

(c) Upper bound and fitted curve

Figure 89: Torino Region II. (a) shows the network exhibit used for the MFD estimation and calculation of network topology variables. The map is oriented to the north and is obtained from OpenStreetMap. (b) presents the scatter plot of the raw, i.e., unfiltered, data of the network shown in a. This includes all malfunctioning detectors, oversampling of lanes, detectors on residential roads etc. (c) shows the upper-bound of the estimated MFD and the fitted curve based on the log-exp function by Ambühl et al. (2018). Flow and density are per lane. Occupancy is in the interval 0 to 1 and means the fraction of time in the observation interval a detector is covered by vehicles, i.e., it approximates density.

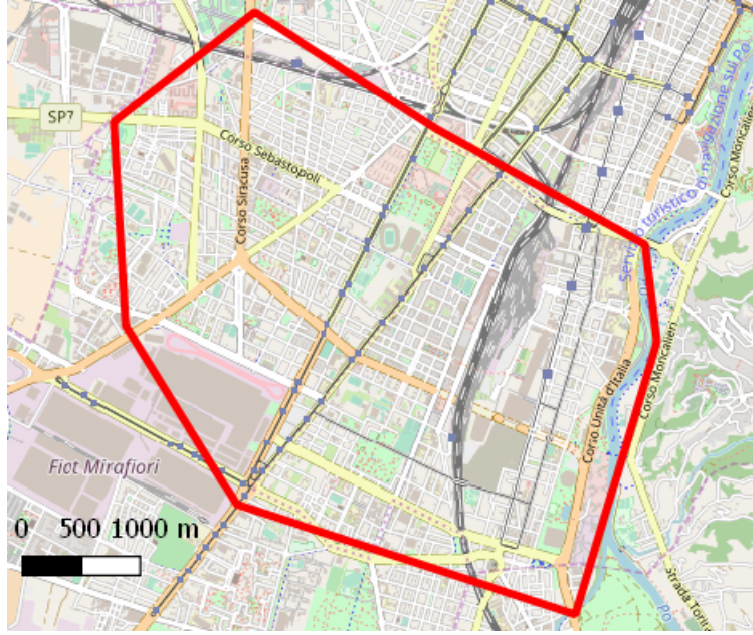

(a) Network exhibit

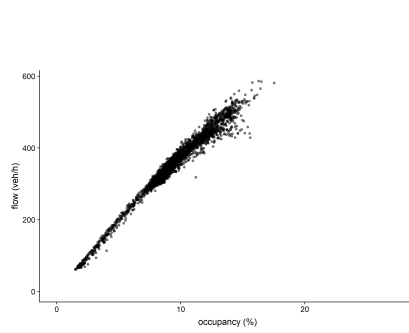

(b) Raw data

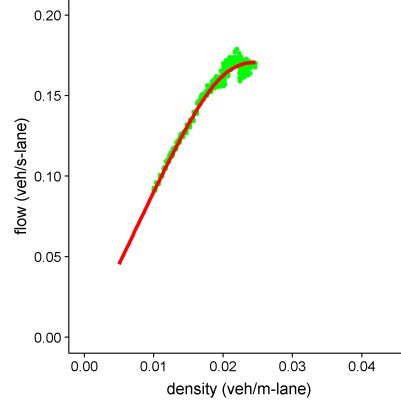

(c) Upper bound and fitted curve

Figure 90: Torino Region III. (a) shows the network exhibit used for the MFD estimation and calculation of network topology variables. The map is oriented to the north and is obtained from OpenStreetMap. (b) presents the scatter plot of the raw, i.e., unfiltered, data of the network shown in a. This includes all malfunctioning detectors, oversampling of lanes, detectors on residential roads etc. (c) shows the upper-bound of the estimated MFD and the fitted curve based on the log-exp function by Ambühl et al. (2018). Flow and density are per lane. Occupancy is in the interval 0 to 1 and means the fraction of time in the observation interval a detector is covered by vehicles, i.e., it approximates density.

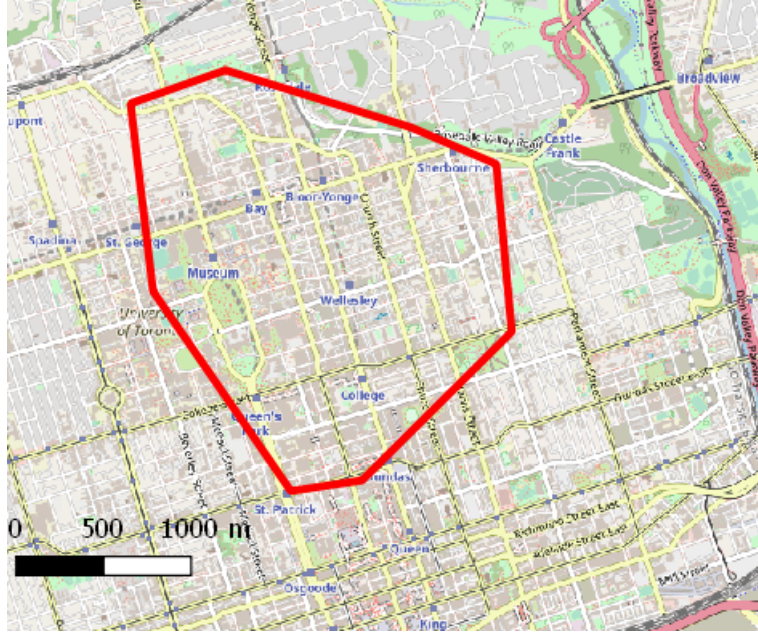

(a) Network exhibit

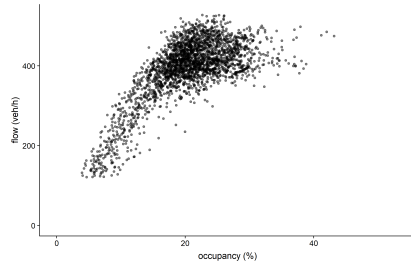

(b) Raw data

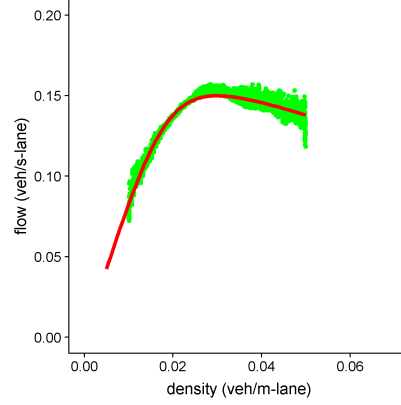

(c) Upper bound and fitted curve

Figure 91: Toronto Region I. (a) shows the network exhibit used for the MFD estimation and calculation of network topology variables. The map is oriented to the north and is obtained from OpenStreetMap. (b) presents the scatter plot of the raw, i.e., unfiltered, data of the network shown in a. This includes all malfunctioning detectors, oversampling of lanes, detectors on residential roads etc. (c) shows the upper-bound of the estimated MFD and the fitted curve based on the log-exp function by Ambühl et al. (2018). Flow and density are per lane. Occupancy is in the interval 0 to 1 and means the fraction of time in the observation interval a detector is covered by vehicles, i.e., it approximates density.

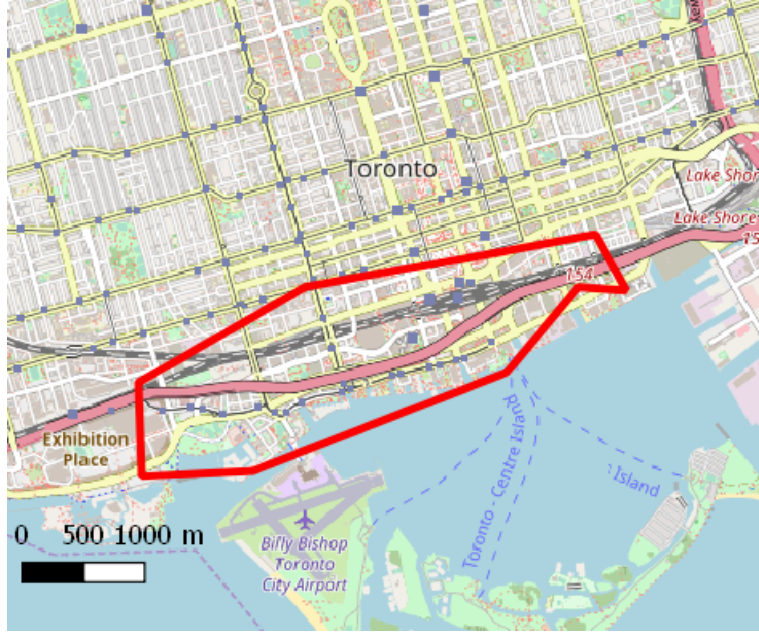

(a) Network exhibit

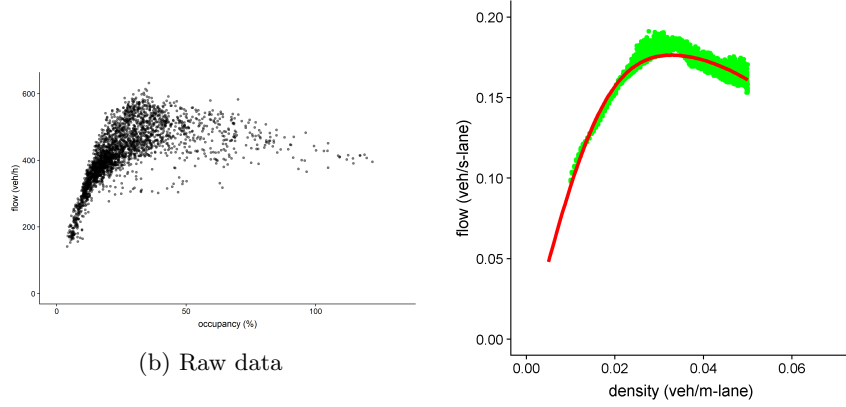

(b) Raw data

(c) Upper bound and fitted curve

Figure 92: Toronto Region II. (a) shows the network exhibit used for the MFD estimation and calculation of network topology variables. The map is oriented to the north and is obtained from OpenStreetMap. (b) presents the scatter plot of the raw, i.e., unfiltered, data of the network shown in a. This includes all malfunctioning detectors, oversampling of lanes, detectors on residential roads etc. (c) shows the upper-bound of the estimated MFD and the fitted curve based on the log-exp function by Ambühl et al. (2018). Flow and density are per lane. Occupancy is in the interval 0 to 1 and means the fraction of time in the observation interval a detector is covered by vehicles, i.e., it approximates density.

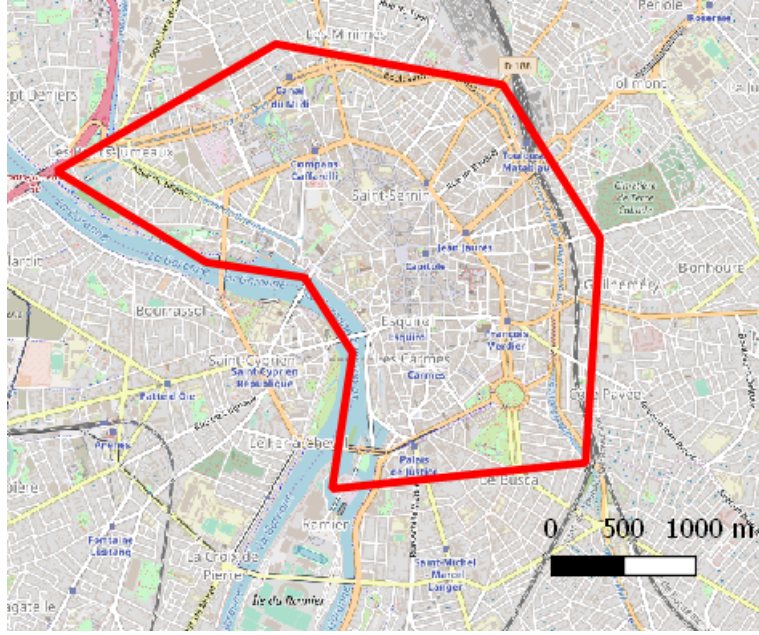

(a) Network exhibit

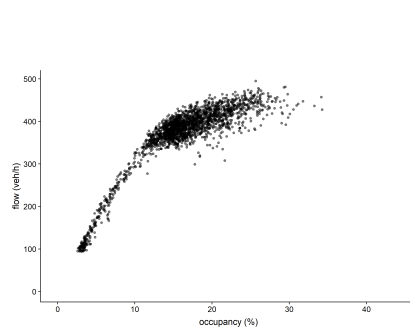

(b) Raw data

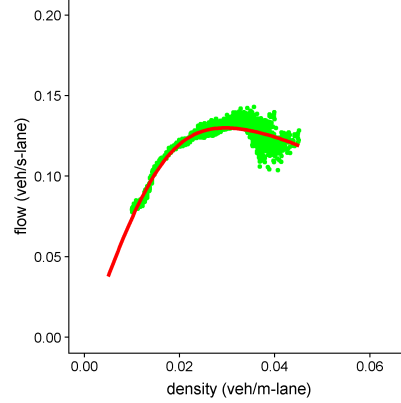

(c) Upper bound and fitted curve

Figure 93: Toulouse Region I. (a) shows the network exhibit used for the MFD estimation and calculation of network topology variables. The map is oriented to the north and is obtained from OpenStreetMap. (b) presents the scatter plot of the raw, i.e., unfiltered, data of the network shown in a. This includes all malfunctioning detectors, oversampling of lanes, detectors on residential roads etc. (c) shows the upper-bound of the estimated MFD and the fitted curve based on the log-exp function by Ambühl et al. (2018). Flow and density are per lane. Occupancy is in the interval 0 to 1 and means the fraction of time in the observation interval a detector is covered by vehicles, i.e., it approximates density.

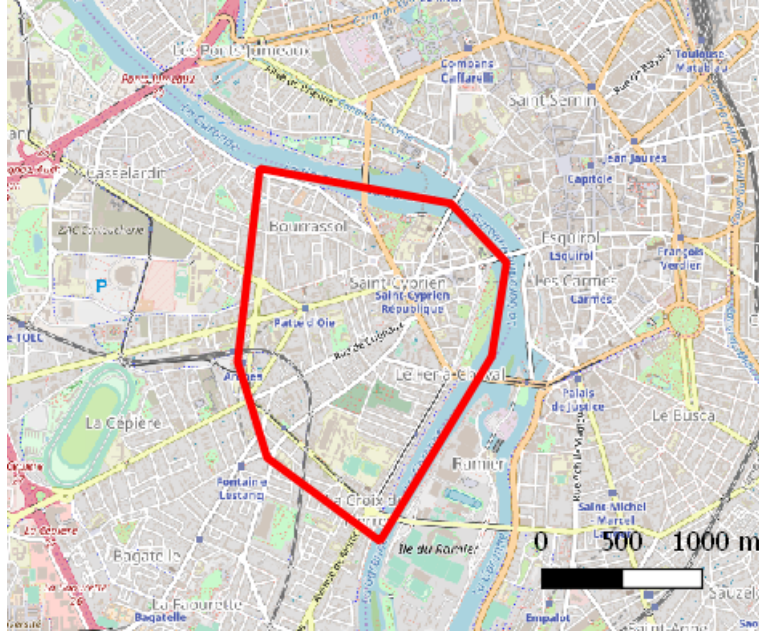

(a) Network exhibit

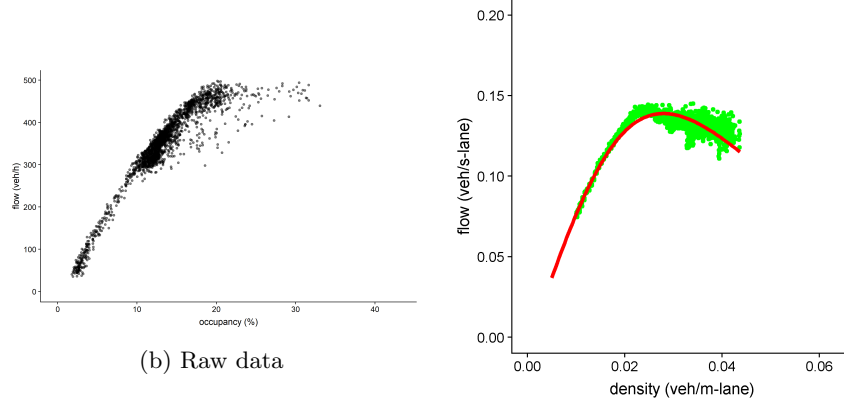

(b) Raw data

(c) Upper bound and fitted curve

Figure 94: Toulouse Region II. (a) shows the network exhibit used for the MFD estimation and calculation of network topology variables. The map is oriented to the north and is obtained from OpenStreetMap. (b) presents the scatter plot of the raw, i.e., unfiltered, data of the network shown in a. This includes all malfunctioning detectors, oversampling of lanes, detectors on residential roads etc. (c) shows the upper-bound of the estimated MFD and the fitted curve based on the log-exp function by Ambühl et al. (2018). Flow and density are per lane. Occupancy is in the interval 0 to 1 and means the fraction of time in the observation interval a detector is covered by vehicles, i.e., it approximates density.

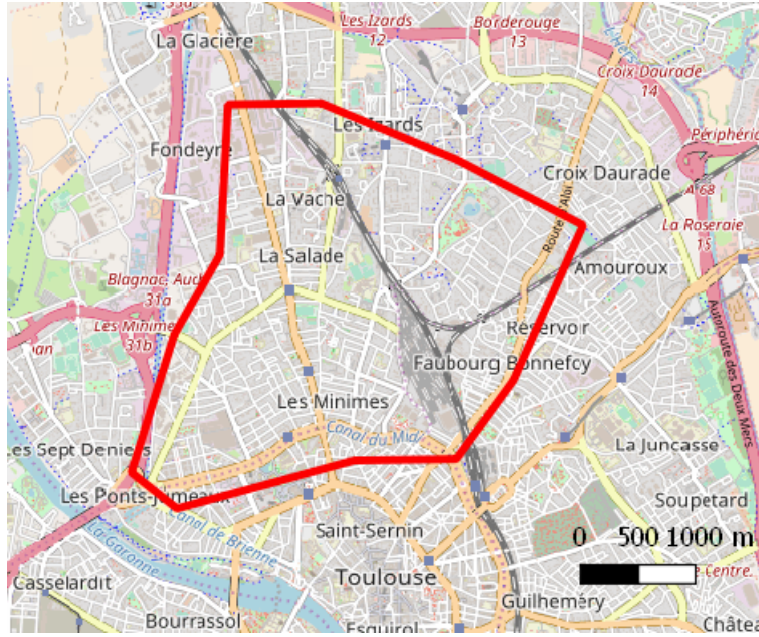

(a) Network exhibit

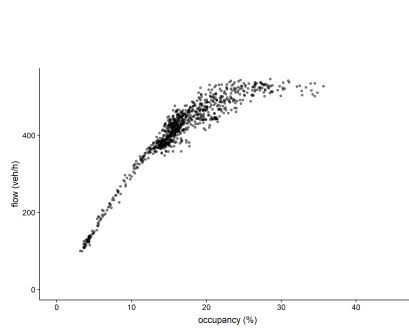

(b) Raw data

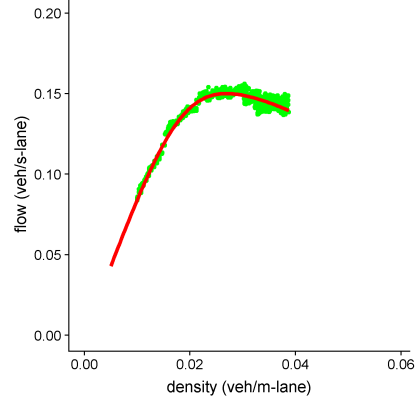

(c) Upper bound and fitted curve

Figure 95: Toulouse Region III. (a) shows the network exhibit used for the MFD estimation and calculation of network topology variables. The map is oriented to the north and is obtained from OpenStreetMap. (b) presents the scatter plot of the raw, i.e., unfiltered, data of the network shown in a. This includes all malfunctioning detectors, oversampling of lanes, detectors on residential roads etc. (c) shows the upper-bound of the estimated MFD and the fitted curve based on the log-exp function by Ambühl et al. (2018). Flow and density are per lane. Occupancy is in the interval 0 to 1 and means the fraction of time in the observation interval a detector is covered by vehicles, i.e., it approximates density.

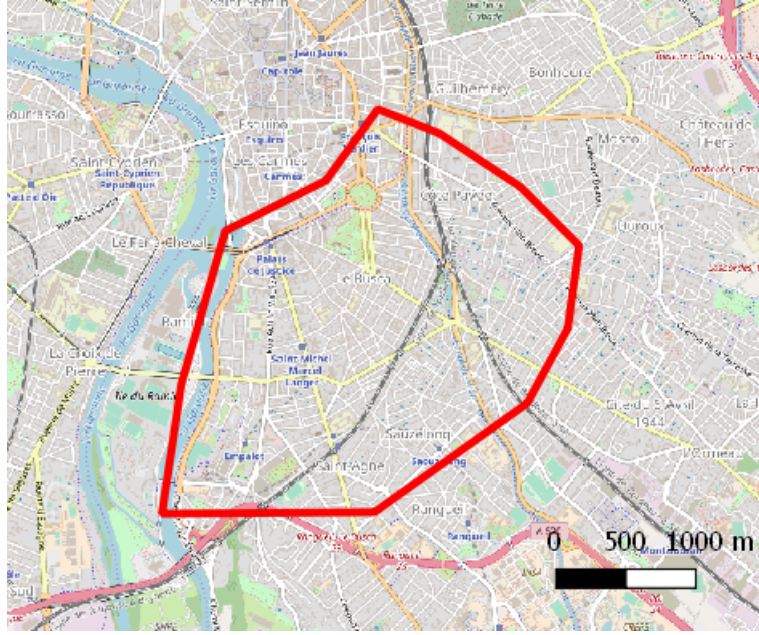

(a) Network exhibit

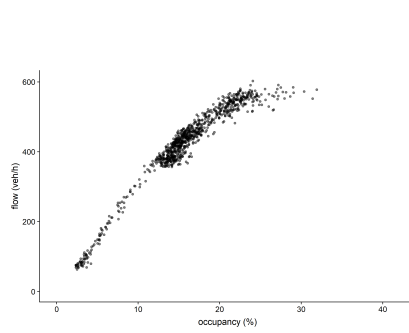

(b) Raw data

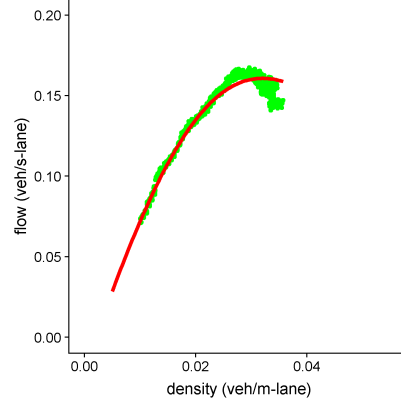

(c) Upper bound and fitted curve

Figure 96: Toulouse Region IV. (a) shows the network exhibit used for the MFD estimation and calculation of network topology variables. The map is oriented to the north and is obtained from OpenStreetMap. (b) presents the scatter plot of the raw, i.e., unfiltered, data of the network shown in a. This includes all malfunctioning detectors, oversampling of lanes, detectors on residential roads etc. (c) shows the upper-bound of the estimated MFD and the fitted curve based on the log-exp function by Ambühl et al. (2018). Flow and density are per lane. Occupancy is in the interval 0 to 1 and means the fraction of time in the observation interval a detector is covered by vehicles, i.e., it approximates density.

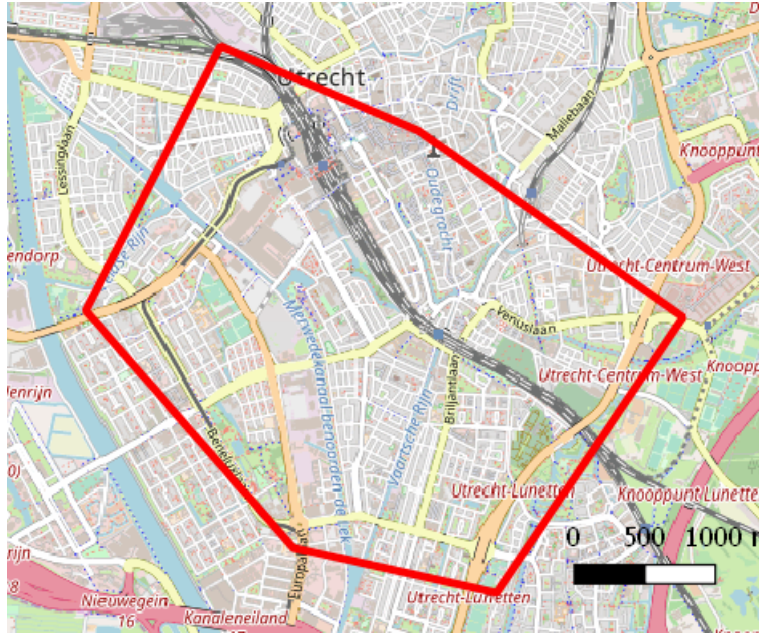

(a) Network exhibit

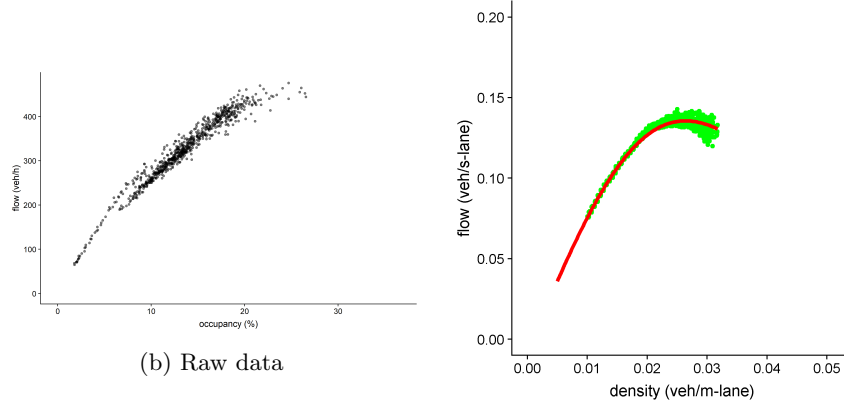

(b) Raw data

(c) Upper bound and fitted curve

Figure 97: Utrecht Region I. (a) shows the network exhibit used for the MFD estimation and calculation of network topology variables. The map is oriented to the north and is obtained from OpenStreetMap. (b) presents the scatter plot of the raw, i.e., unfiltered, data of the network shown in a. This includes all malfunctioning detectors, oversampling of lanes, detectors on residential roads etc. (c) shows the upper-bound of the estimated MFD and the fitted curve based on the log-exp function by Ambühl et al. (2018). Flow and density are per lane. Occupancy is in the interval 0 to 1 and means the fraction of time in the observation interval a detector is covered by vehicles, i.e., it approximates density.

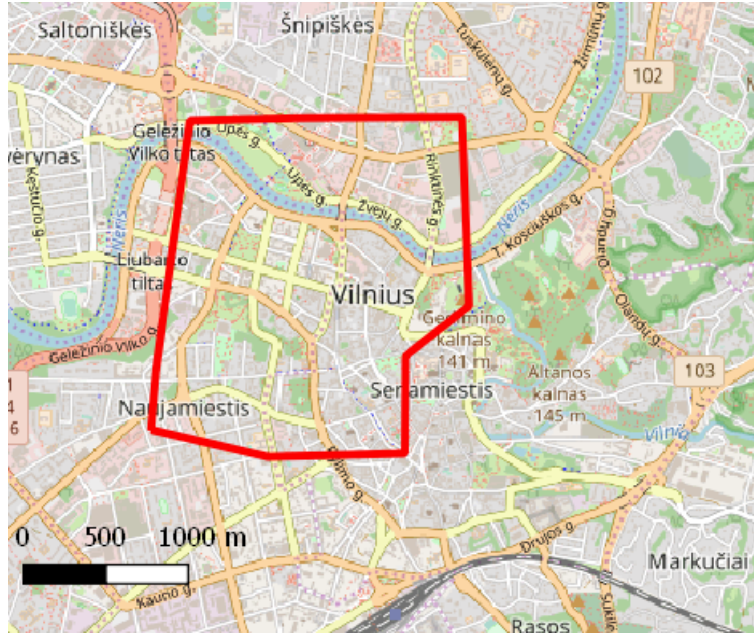

(a) Network exhibit

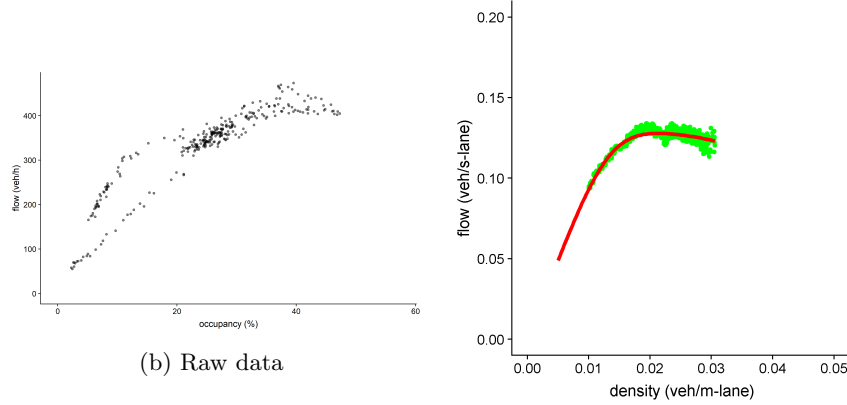

(b) Raw data

(c) Upper bound and fitted curve

Figure 98: Vilnius Region I. (a) shows the network exhibit used for the MFD estimation and calculation of network topology variables. The map is oriented to the north and is obtained from OpenStreetMap. (b) presents the scatter plot of the raw, i.e., unfiltered, data of the network shown in a. This includes all malfunctioning detectors, oversampling of lanes, detectors on residential roads etc. (c) shows the upper-bound of the estimated MFD and the fitted curve based on the log-exp function by Ambühl et al. (2018). Flow and density are per lane. Occupancy is in the interval 0 to 1 and means the fraction of time in the observation interval a detector is covered by vehicles, i.e., it approximates density.

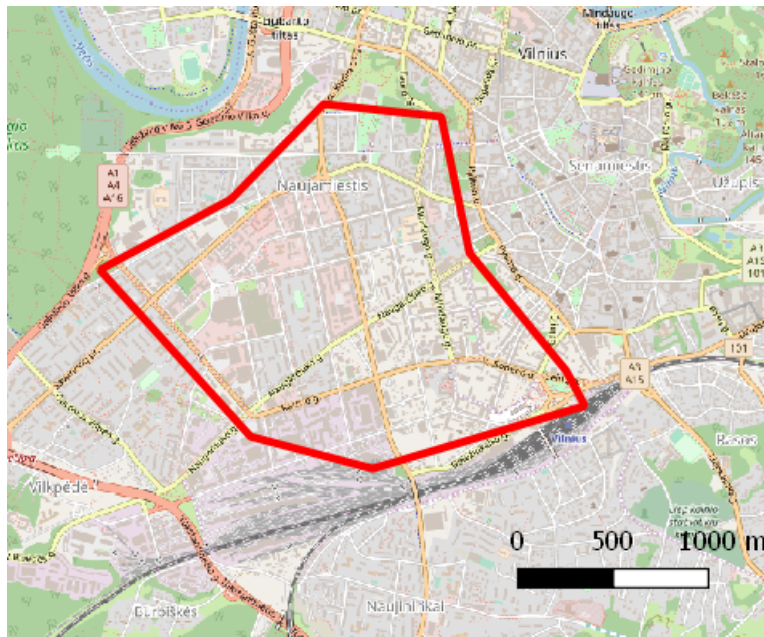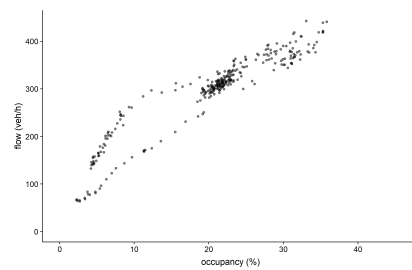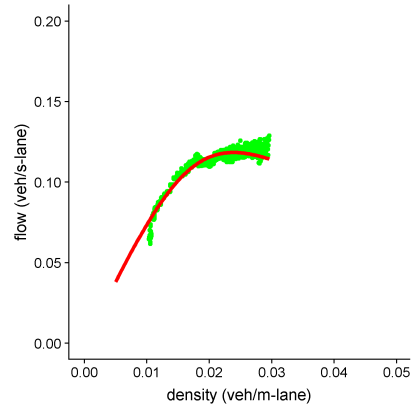

Figure 99: Vilnius Region II. **(a)** shows the network exhibit used for the MFD estimation and calculation of network topology variables. The map is oriented to the north and is obtained from OpenStreetMap. **(b)** presents the scatter plot of the raw, i.e., unfiltered, data of the network shown in **a**. This includes all malfunctioning detectors, oversampling of lanes, detectors on residential roads etc. **(c)** shows the upper-bound of the estimated MFD and the fitted curve based on the log-exp function by Ambühl et al. (2018). Flow and density are per lane. Occupancy is in the interval 0 to 1 and means the fraction of time in the observation interval a detector is covered by vehicles, i.e., it approximates density.

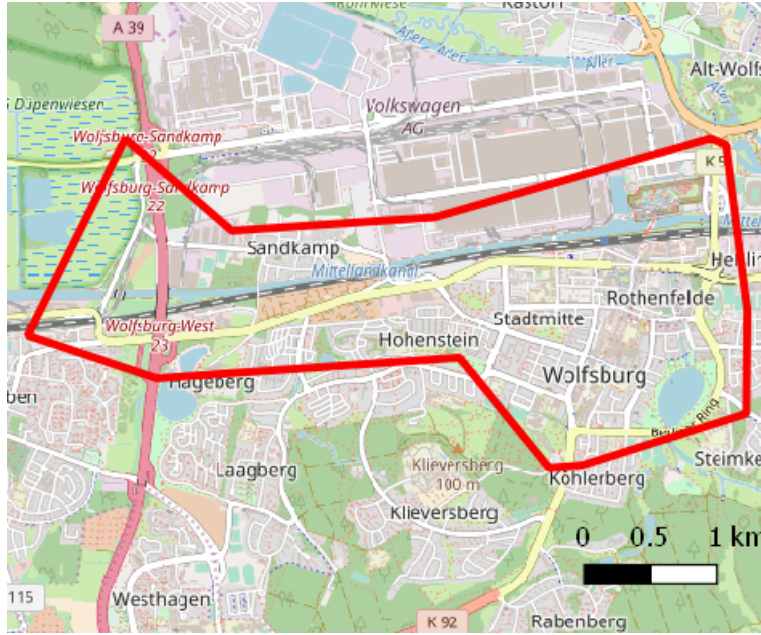

(a) Network exhibit

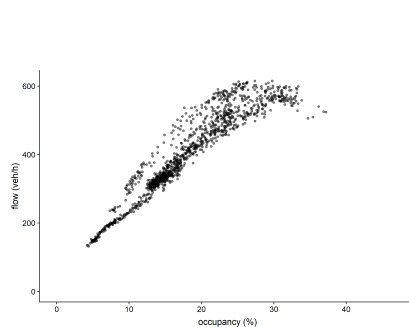

(b) Raw data

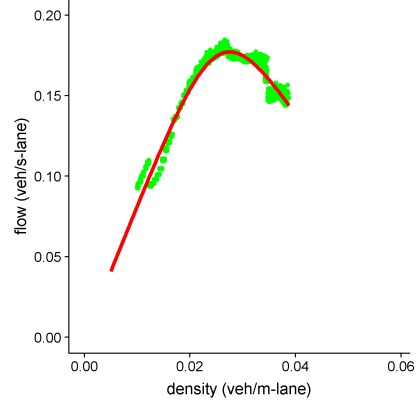

(c) Upper bound and fitted curve

Figure 100: Wolfsburg Region I. (a) shows the network exhibit used for the MFD estimation and calculation of network topology variables. The map is oriented to the north and is obtained from OpenStreetMap. (b) presents the scatter plot of the raw, i.e., unfiltered, data of the network shown in a. This includes all malfunctioning detectors, oversampling of lanes, detectors on residential roads etc. (c) shows the upper-bound of the estimated MFD and the fitted curve based on the log-exp function by Ambühl et al. (2018). Flow and density are per lane. Occupancy is in the interval 0 to 1 and means the fraction of time in the observation interval a detector is covered by vehicles, i.e., it approximates density.

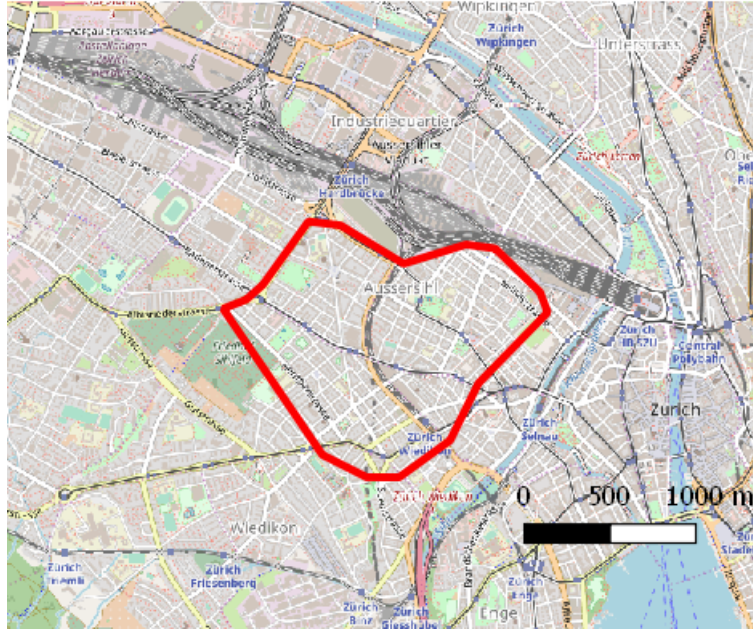

(a) Network exhibit

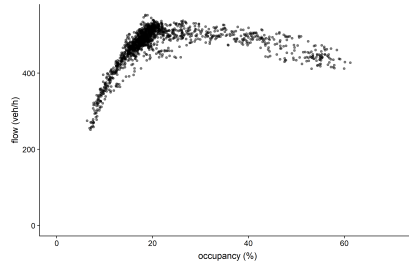

(b) Raw data

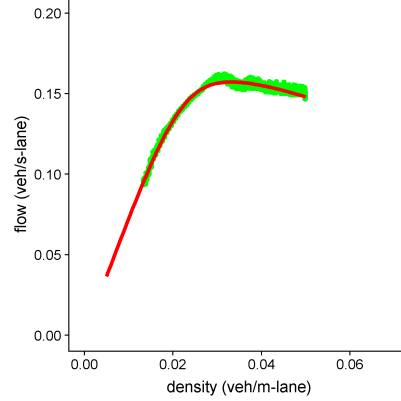

(c) Upper bound and fitted curve

Figure 101: Zurich Region I. (a) shows the network exhibit used for the MFD estimation and calculation of network topology variables. The map is oriented to the north and is obtained from OpenStreetMap. (b) presents the scatter plot of the raw, i.e., unfiltered, data of the network shown in a. This includes all malfunctioning detectors, oversampling of lanes, detectors on residential roads etc. (c) shows the upper-bound of the estimated MFD and the fitted curve based on the log-exp function by Ambühl et al. (2018). Flow and density are per lane. Occupancy is in the interval 0 to 1 and means the fraction of time in the observation interval a detector is covered by vehicles, i.e., it approximates density.

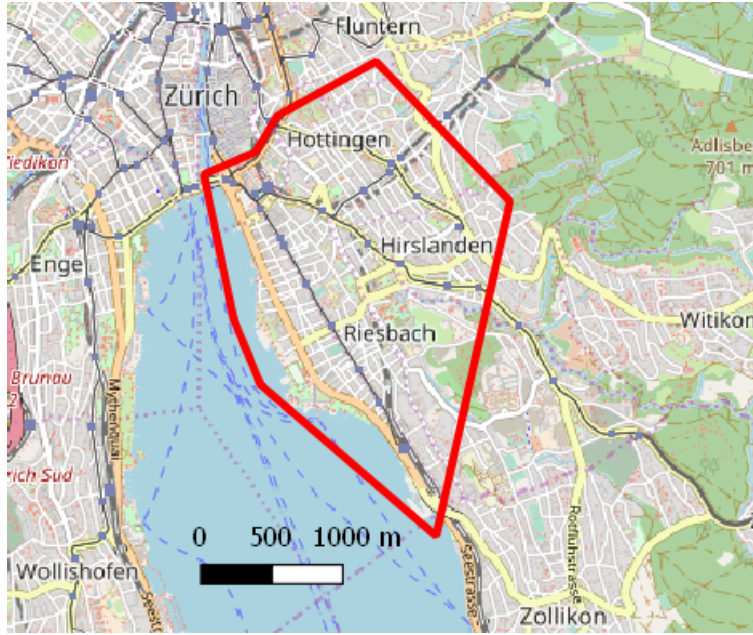

(a) Network exhibit

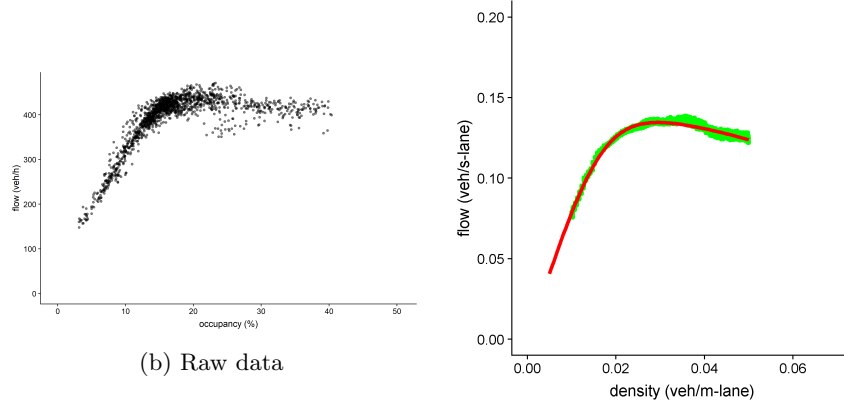

(b) Raw data

(c) Upper bound and fitted curve

Figure 102: Zurich Region II. (a) shows the network exhibit used for the MFD estimation and calculation of network topology variables. The map is oriented to the north and is obtained from OpenStreetMap. (b) presents the scatter plot of the raw, i.e., unfiltered, data of the network shown in a. This includes all malfunctioning detectors, oversampling of lanes, detectors on residential roads etc. (c) shows the upper-bound of the estimated MFD and the fitted curve based on the log-exp function by Ambühl et al. (2018). Flow and density are per lane. Occupancy is in the interval 0 to 1 and means the fraction of time in the observation interval a detector is covered by vehicles, i.e., it approximates density.

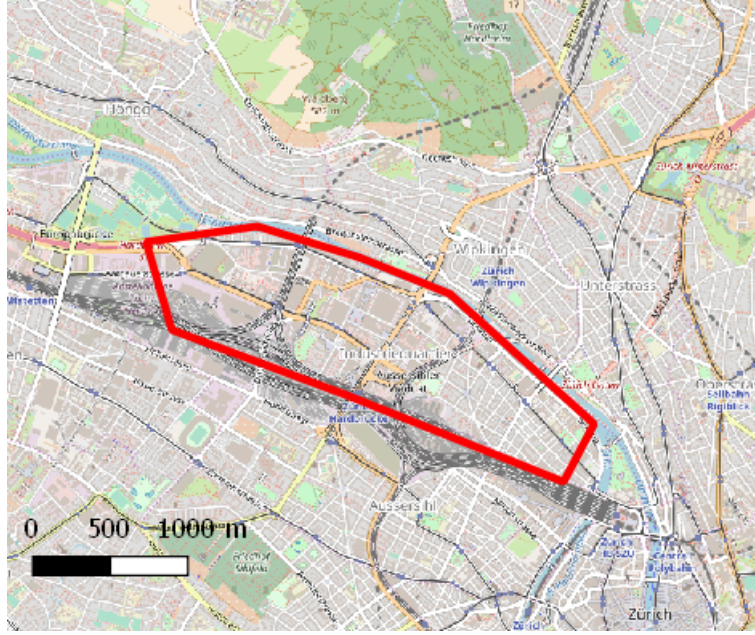

(a) Network exhibit

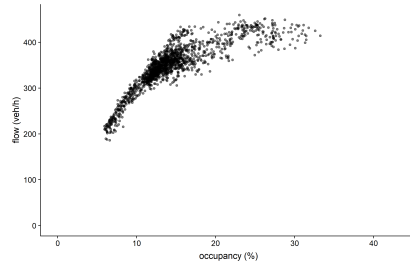

(b) Raw data

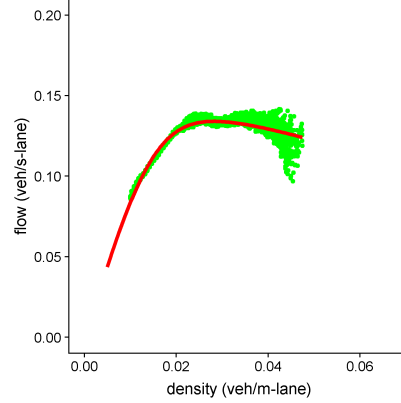

(c) Upper bound and fitted curve

Figure 103: Zurich Region III. (a) shows the network exhibit used for the MFD estimation and calculation of network topology variables. The map is oriented to the north and is obtained from OpenStreetMap. (b) presents the scatter plot of the raw, i.e., unfiltered, data of the network shown in a. This includes all malfunctioning detectors, oversampling of lanes, detectors on residential roads etc. (c) shows the upper-bound of the estimated MFD and the fitted curve based on the log-exp function by Ambühl et al. (2018). Flow and density are per lane. Occupancy is in the interval 0 to 1 and means the fraction of time in the observation interval a detector is covered by vehicles, i.e., it approximates density.

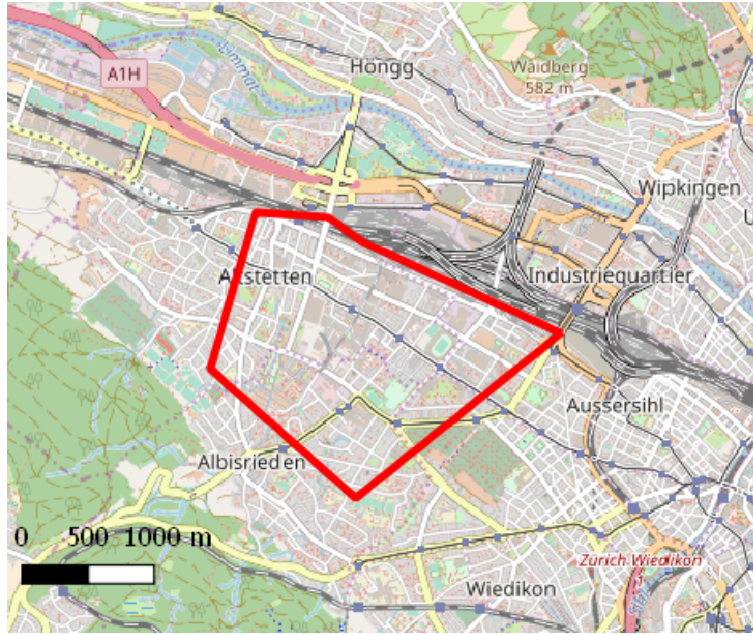

(a) Network exhibit

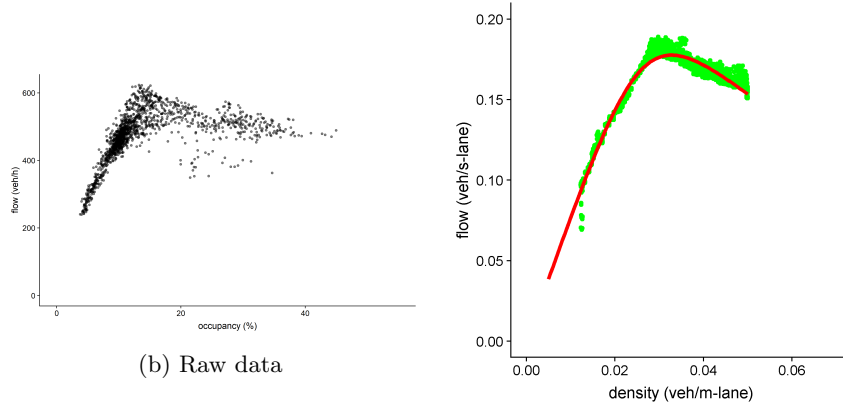

(b) Raw data

(c) Upper bound and fitted curve

Figure 104: Zurich Region IV. (a) shows the network exhibit used for the MFD estimation and calculation of network topology variables. The map is oriented to the north and is obtained from OpenStreetMap. (b) presents the scatter plot of the raw, i.e., unfiltered, data of the network shown in a. This includes all malfunctioning detectors, oversampling of lanes, detectors on residential roads etc. (c) shows the upper-bound of the estimated MFD and the fitted curve based on the log-exp function by Ambühl et al. (2018). Flow and density are per lane. Occupancy is in the interval 0 to 1 and means the fraction of time in the observation interval a detector is covered by vehicles, i.e., it approximates density.

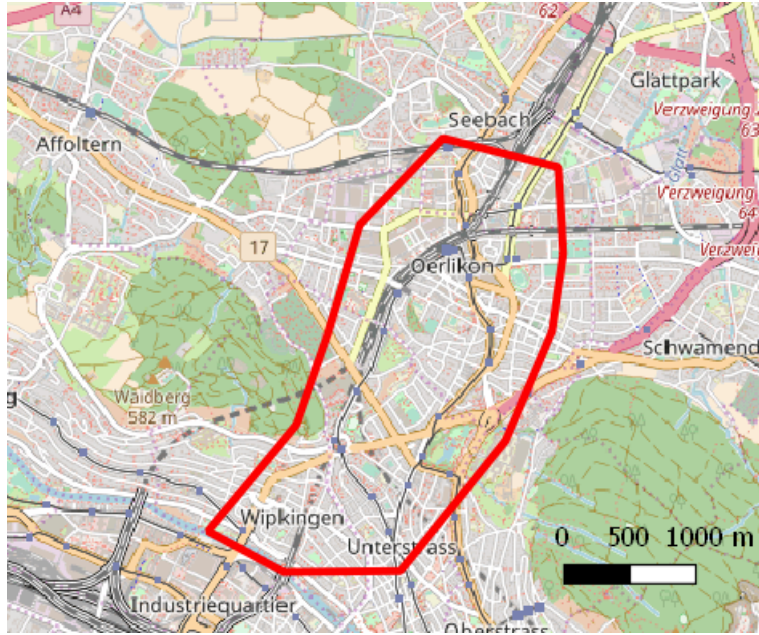

(a) Network exhibit

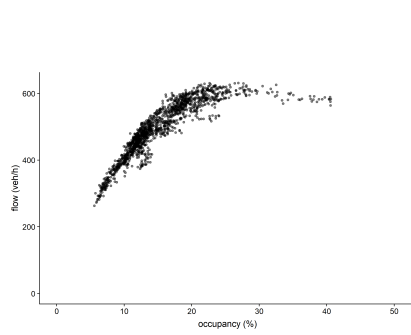

(b) Raw data

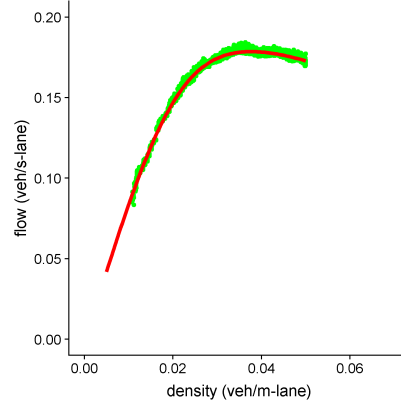

(c) Upper bound and fitted curve

Figure 105: Zurich Region V. (a) shows the network exhibit used for the MFD estimation and calculation of network topology variables. The map is oriented to the north and is obtained from OpenStreetMap. (b) presents the scatter plot of the raw, i.e., unfiltered, data of the network shown in a. This includes all malfunctioning detectors, oversampling of lanes, detectors on residential roads etc. (c) shows the upper-bound of the estimated MFD and the fitted curve based on the log-exp function by Ambühl et al. (2018). Flow and density are per lane. Occupancy is in the interval 0 to 1 and means the fraction of time in the observation interval a detector is covered by vehicles, i.e., it approximates density.

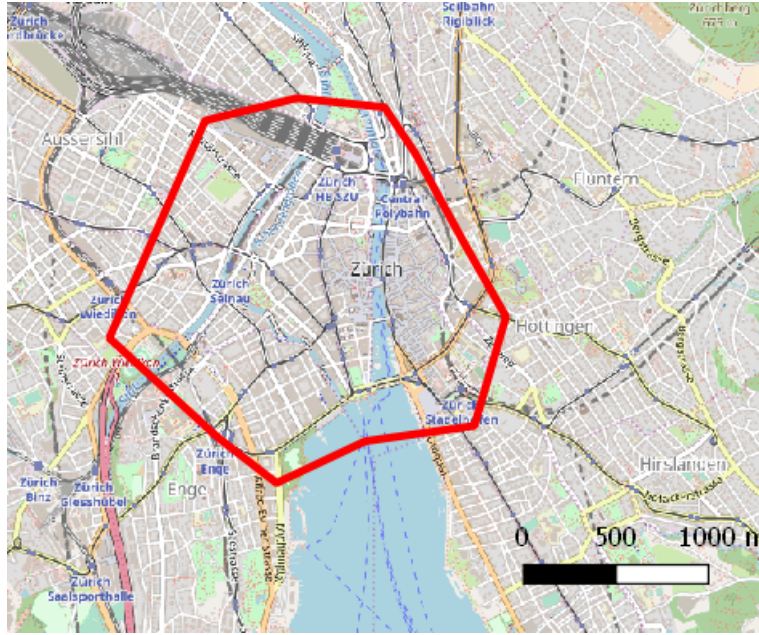

(a) Network exhibit

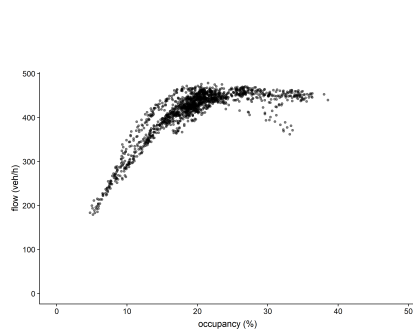

(b) Raw data

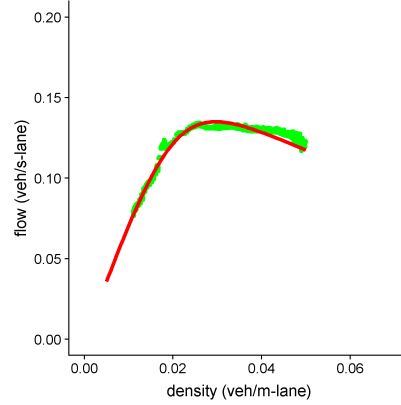

(c) Upper bound and fitted curve

Figure 106: Zurich Region VI. (a) shows the network exhibit used for the MFD estimation and calculation of network topology variables. The map is oriented to the north and is obtained from OpenStreetMap. (b) presents the scatter plot of the raw, i.e., unfiltered, data of the network shown in a. This includes all malfunctioning detectors, oversampling of lanes, detectors on residential roads etc. (c) shows the upper-bound of the estimated MFD and the fitted curve based on the log-exp function by Ambühl et al. (2018). Flow and density are per lane. Occupancy is in the interval 0 to 1 and means the fraction of time in the observation interval a detector is covered by vehicles, i.e., it approximates density.

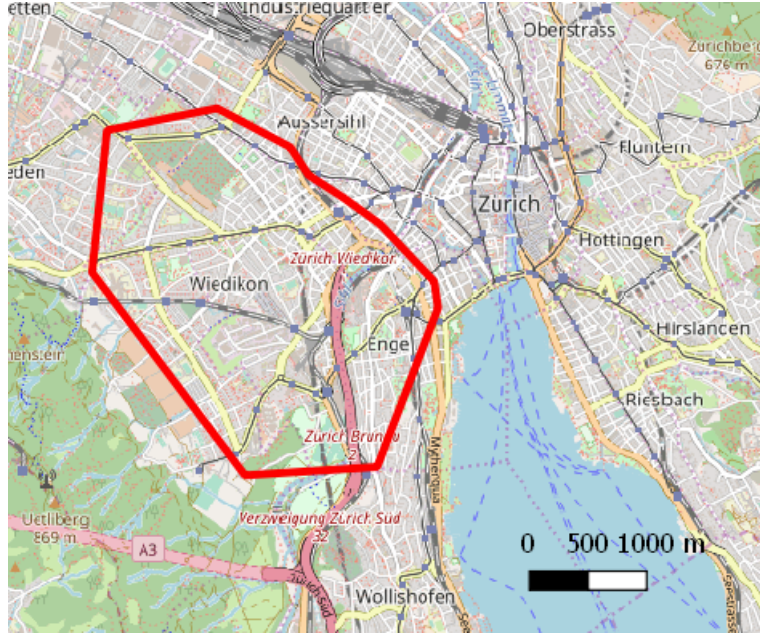

(a) Network exhibit

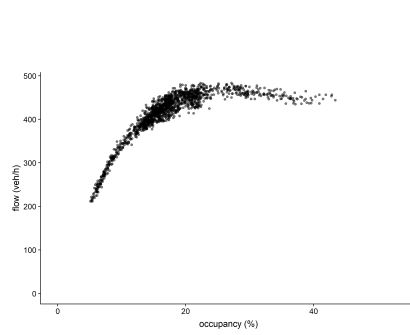

(b) Raw data

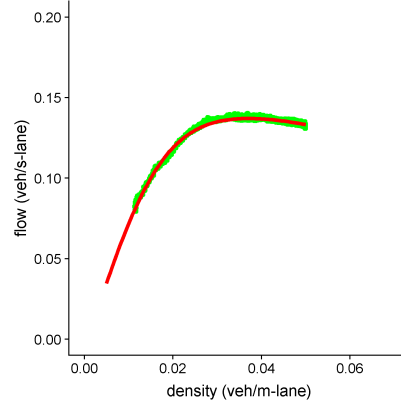

(c) Upper bound and fitted curve

Figure 107: Zurich Region VII. (a) shows the network exhibit used for the MFD estimation and calculation of network topology variables. The map is oriented to the north and is obtained from OpenStreetMap. (b) presents the scatter plot of the raw, i.e., unfiltered, data of the network shown in a. This includes all malfunctioning detectors, oversampling of lanes, detectors on residential roads etc. (c) shows the upper-bound of the estimated MFD and the fitted curve based on the log-exp function by Ambühl et al. (2018). Flow and density are per lane. Occupancy is in the interval 0 to 1 and means the fraction of time in the observation interval a detector is covered by vehicles, i.e., it approximates density.
